# Supplementary material for: Spatiotemporal coupling and decoupling of gene transcription with DNA replication origins during embryogenesis in C. elegans
Source: eLife journal article supplement (doi:10.7554/elife.21728), 2016-12-23
Supplement: supp [file elife-21728-supp-v1.zip]

Archive with 8 entries (8 files):
- elife_poa_e21728_Figure_4_figure_supplement_1.pdf
- elife_poa_e21728_Figure_2_figure_supplement_1.pdf
- elife_poa_e21728_Figure_1_figure_supplement_3.pdf
- elife_poa_e21728_Figure_1_figure_supplement_1.pdf
- elife_poa_e21728_Figure_1_figure_supplement_4.pdf
- elife_poa_e21728_Figure_1_figure_supplement_2.pdf
- elife_poa_e21728_Figure_4_figure_supplement_2.pdf
- elife_poa_e21728_Supplementary_File.xlsx
