# Supplementary material for: Spatiotemporal coupling and decoupling of gene transcription with DNA replication origins during embryogenesis in C. elegans
Source: eLife journal article supplement (doi:10.7554/elife.21728), 2016-12-23
Supplement: supp [file elife-21728-supp-v1.zip › elife_poa_e21728_Figure_1_figure_supplement_1.pdf]

Pourkarimi et al., Figure 1- figure supplement 1

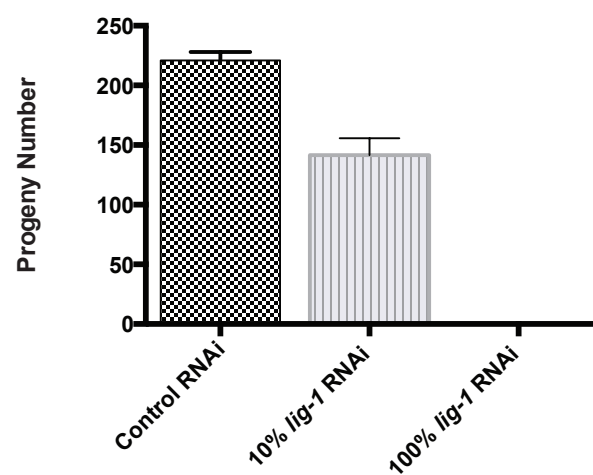

Figure 1- figure supplement 1

Average progeny number in *C. elegans* treated with 100% and 10% lig-1 RNAi. Mean ± SD is presented, n=10.
