# Supplementary material for: Spatiotemporal coupling and decoupling of gene transcription with DNA replication origins during embryogenesis in C. elegans
Source: eLife journal article supplement (doi:10.7554/elife.21728), 2016-12-23
Supplement: supp [file elife-21728-supp-v1.zip › elife_poa_e21728_Figure_1_figure_supplement_2.pdf]

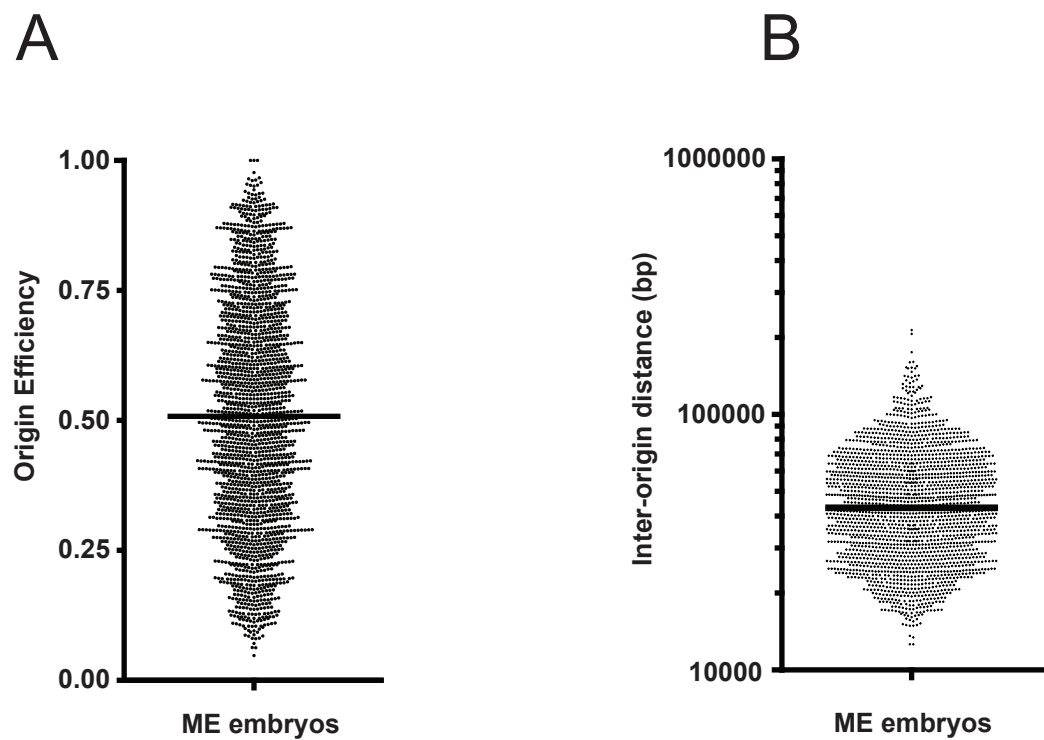

Figure 1- figure supplement 2

**A & B,** Scatter dot-plots of replication origin efficiencies and inter-origin distances from mixed early embryos (ME), median values are shown as a black horizontal bars.
