# Supplementary material for: Spatiotemporal coupling and decoupling of gene transcription with DNA replication origins during embryogenesis in C. elegans
Source: eLife journal article supplement (doi:10.7554/elife.21728), 2016-12-23
Supplement: supp [file elife-21728-supp-v1.zip › elife_poa_e21728_Figure_1_figure_supplement_4.pdf]

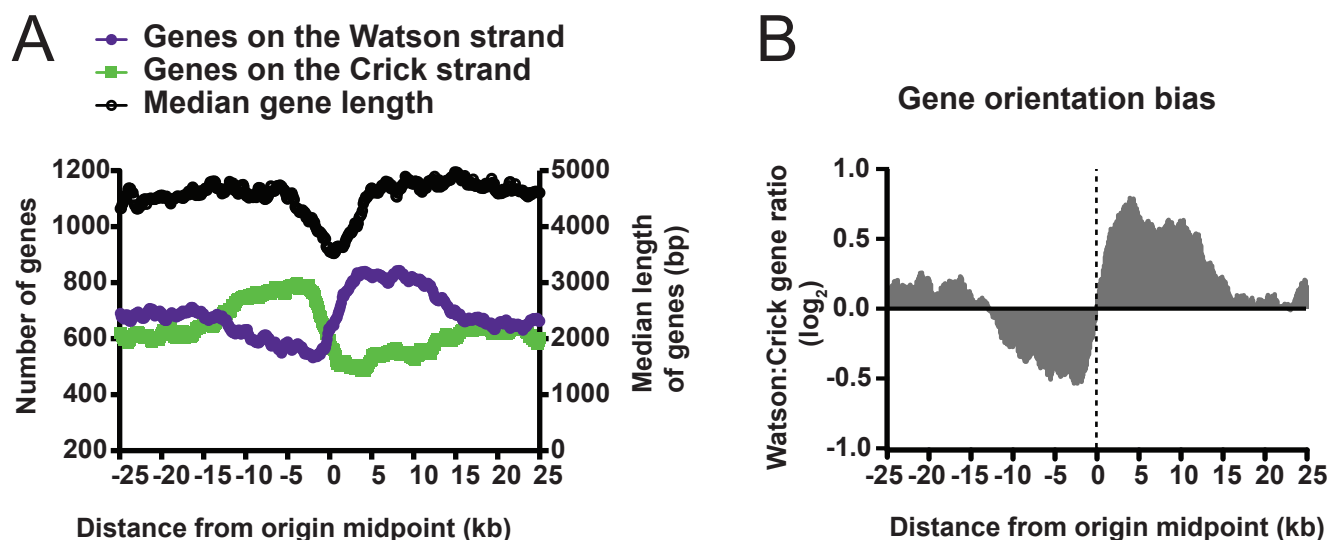

Figure 1- figure supplement 4

**A**, Graph displaying the length and strand bias of genes within +/- 25kb of replication origins. Median gene length, defined as from translation start to end, is shown as black line on right y-axis. Strand bias of gene orientation is shown on the left y-axis; Watson strand genes (purple) are defined as genes whose transcribed RNA is complementary to the Crick strand; Crick strand genes (green) have RNA product complementary to the Watson strand. **B**, Gene orientation bias from A is displayed as a  $\log_2$  ratio of Watson:Crick genes.
