# Supplementary material for: Spatiotemporal coupling and decoupling of gene transcription with DNA replication origins during embryogenesis in C. elegans
Source: eLife journal article supplement (doi:10.7554/elife.21728), 2016-12-23
Supplement: supp [file elife-21728-supp-v1.zip › elife_poa_e21728_Figure_2_figure_supplement_1.pdf]

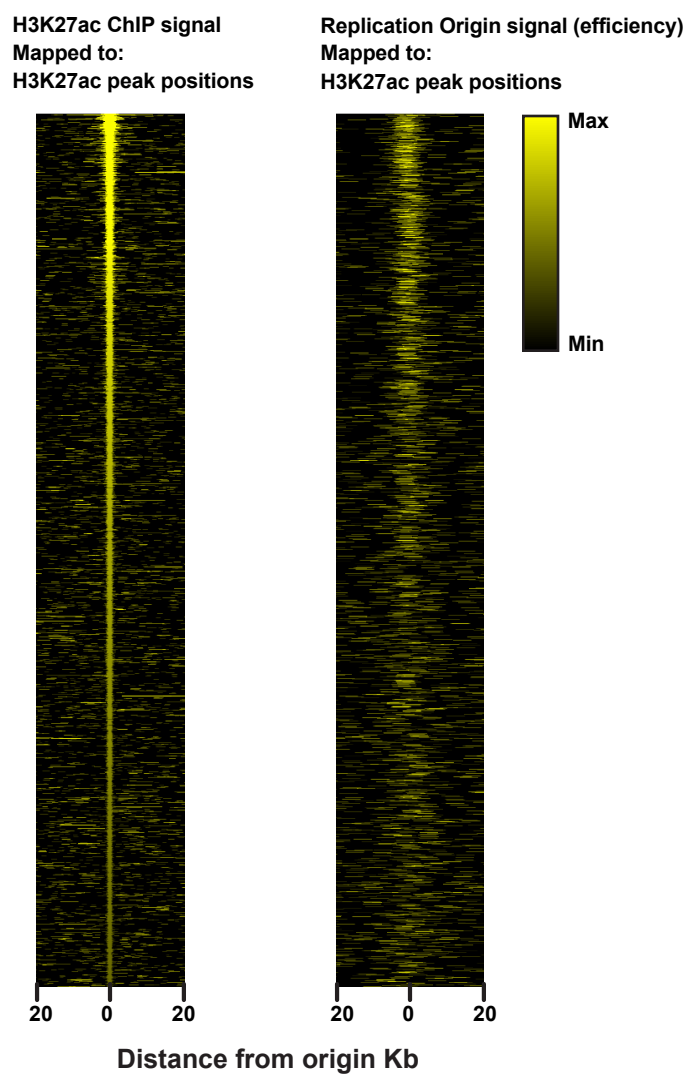

Figure 2- figure supplement 1

Heatmap illustrating the relationship between H3K27ac and replication origins. H3K27ac peaks as defined by Macs2 (see methods) were used as reference positions to map either H3K27ac ChIP signal (left) or origin efficiency (right).
