# Supplementary material for: Spatiotemporal coupling and decoupling of gene transcription with DNA replication origins during embryogenesis in C. elegans
Source: eLife journal article supplement (doi:10.7554/elife.21728), 2016-12-23
Supplement: supp [file elife-21728-supp-v1.zip › elife_poa_e21728_Figure_4_figure_supplement_1.pdf]

Pourkarimi et al., Figure 4- figure supplement 1

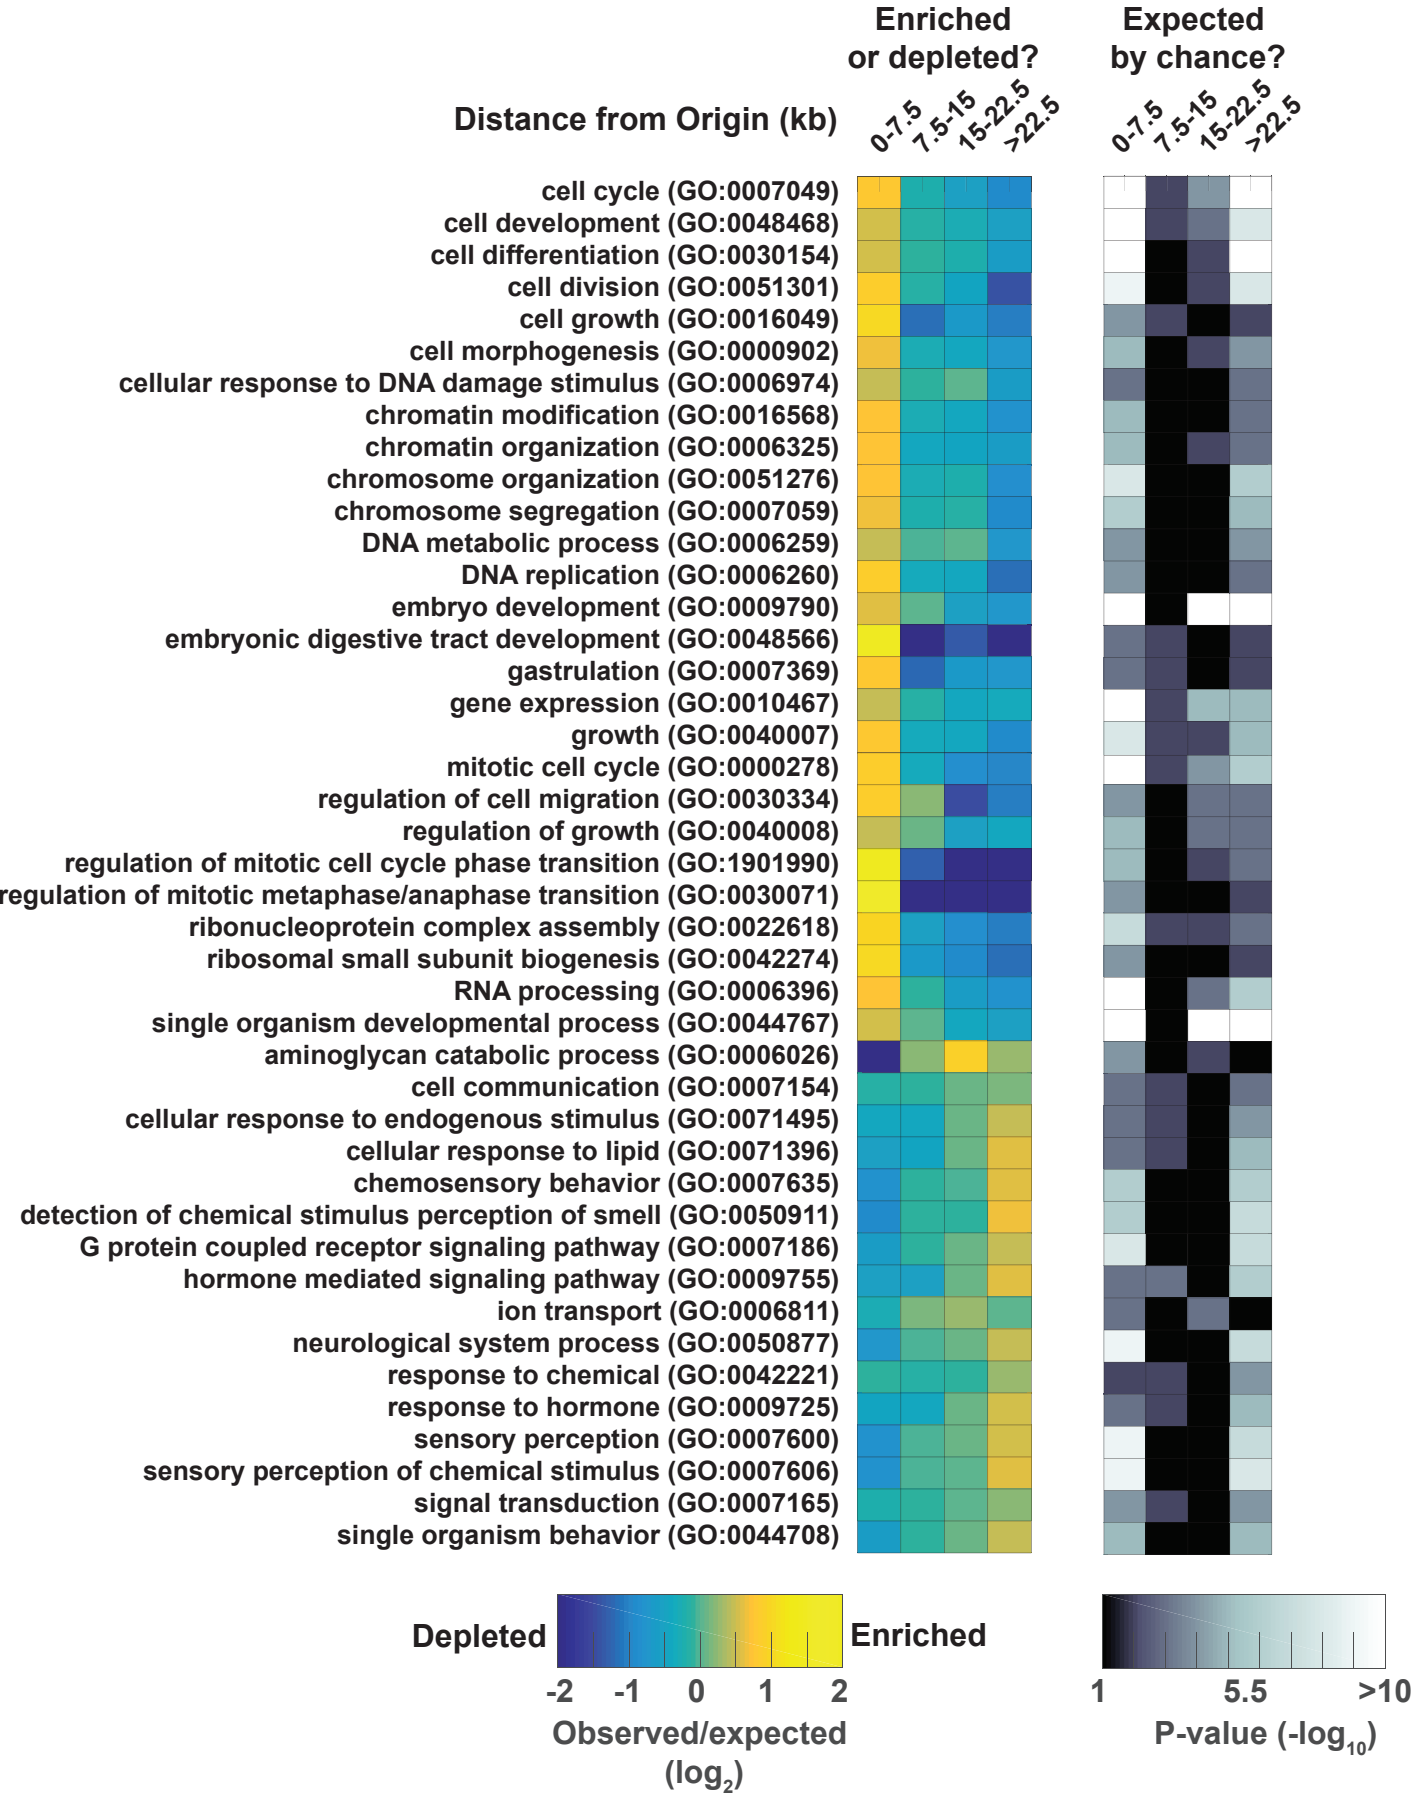

cont...

Figure 4- figure sepplement 1

Gene ontology analysis for genes at varying distances from the midpoint of a replication origin. Gene ontologies were calculated using the Gene Ontology Consortium (<http://geneontology.org/>). Select GO terms with greatest significance are shown that lie within “Biological Process” annotation datasets. Left, observed/expected  $\log_2$  ratio is shown at varying distances from origins for each ontology term as a heatmap: color key is below – yellow indicates enrichment, blue is depletion. Right, heatmap showing the calculated p-values (hypergeometric distribution) for the data on left; color key is below.
