# Supplementary material for: Spatiotemporal coupling and decoupling of gene transcription with DNA replication origins during embryogenesis in C. elegans
Source: eLife journal article supplement (doi:10.7554/elife.21728), 2016-12-23
Supplement: supp [file elife-21728-supp-v1.zip › elife_poa_e21728_Supplementary_File.xlsx]

## Sheet: Sheet1
ME_Ion Torrent (used for majority of anaysis)		Origin Efficiency		PG_Illumina		Origin Efficiency		ME_Illumina		Origin Efficiency		N2Late_Illumina		Origin Efficiency		PG_Ion Torrent		Origin Efficiency		N2Late_Ion Torrent		Origin Efficiency
chrI	17300	0.40152		I	18300	0.558049		I	18200	0.473233		I	18400	0.389404		I	17500	0.388384		I	3400	0.843461
chrI	65400	0.338064		I	43000	0.300386		I	43000	0.160659		I	42300	0.132379		I	41700	0.384349		I	35900	0.309163
chrI	109800	0.563774		I	94000	0.184875		I	94300	0.244469		I	64800	0.355291		I	93800	0.111199		I	75200	0.268971
chrI	128300	0.69038		I	121500	0.564896		I	122600	0.589141		I	94000	0.213455		I	120600	0.57848		I	128400	0.670053
chrI	181400	0.47021		I	170500	0.669902		I	170800	0.629178		I	121700	0.659304		I	166800	0.616026		I	161400	0.327988
chrI	220100	0.481556		I	221700	0.655707		I	221600	0.653285		I	170400	0.608956		I	221500	0.663717		I	219900	0.549477
chrI	274300	0.262231		I	268900	0.78956		I	270300	0.495116		I	221500	0.655409		I	270500	0.670415		I	278400	0.596328
chrI	316900	0.771795		I	345300	0.450732		I	309600	0.603799		I	270300	0.629257		I	307000	0.537568		I	301300	0.688874
chrI	397500	0.793477		I	368700	0.460467		I	345500	0.391181		I	307400	0.196985		I	345700	0.491032		I	345100	0.434054
chrI	440800	0.618051		I	394900	0.542282		I	372000	0.207696		I	345500	0.537577		I	368800	0.636938		I	369300	0.385057
chrI	516800	0.633833		I	412100	0.655215		I	394800	0.42637		I	372000	0.493903		I	395100	0.303184		I	394900	0.433186
chrI	537400	0.759309		I	438300	0.498927		I	438100	0.64301		I	394600	0.199349		I	416500	0.28446		I	419400	0.22235
chrI	607300	0.31508		I	471300	0.271785		I	471200	0.199635		I	412000	0.375803		I	438000	0.42338		I	468600	0.482785
chrI	630600	0.504651		I	539800	0.800776		I	533900	0.815942		I	435900	0.49859		I	471200	0.28775		I	538200	0.768852
chrI	649100	0.813954		I	570400	0.295797		I	570100	0.154224		I	468300	0.332037		I	514000	0.364364		I	566200	0.428394
chrI	720700	0.791355		I	641400	0.409821		I	624300	0.604136		I	533100	0.79828		I	534000	0.744825		I	624600	0.366128
chrI	812700	0.605735		I	662600	0.325227		I	641600	0.328113		I	570300	0.254677		I	565700	0.241747		I	644600	0.697868
chrI	846100	0.18725		I	691400	0.249483		I	681600	0.573301		I	662500	0.233227		I	644600	0.457536		I	703000	0.394167
chrI	898500	0.320958		I	726200	0.759924		I	725300	0.796431		I	691300	0.465459		I	681700	0.181678		I	726200	0.65448
chrI	920300	0.426785		I	753600	0.378858		I	784400	0.33218		I	726200	0.701787		I	725200	0.69572		I	754400	0.375184
chrI	959100	0.870716		I	784400	0.21641		I	812900	0.705013		I	754000	0.6091		I	754000	0.292347		I	814000	0.801264
chrI	1034500	0.753402		I	816100	0.566531		I	861600	0.649223		I	784400	0.291862		I	784400	0.128097		I	840500	0.242162
chrI	1069100	0.601224		I	862300	0.545795		I	909100	0.695936		I	814000	0.691322		I	812800	0.674485		I	864100	0.84403
chrI	1108400	0.263342		I	903300	0.766054		I	959200	0.904705		I	860100	0.413705		I	840600	0.237783		I	898900	0.484859
chrI	1133000	0.294092		I	955300	0.855115		I	1016900	0.283136		I	875300	0.720418		I	862300	0.511314		I	959400	0.778092
chrI	1156900	0.645799		I	1016700	0.690421		I	1037500	0.47653		I	902700	0.700312		I	901500	0.392926		I	992800	0.189322
chrI	1198200	0.17843		I	1034600	0.66991		I	1071900	0.71171		I	920500	0.761819		I	955000	0.441786		I	1016500	0.293591
chrI	1229900	0.406297		I	1071900	0.713523		I	1112300	0.29167		I	955600	0.868543		I	990500	0.192238		I	1037700	0.586355
chrI	1248700	0.598153		I	1111700	0.522066		I	1157800	0.558586		I	1017000	0.322788		I	1034600	0.611115		I	1072500	0.631715
chrI	1295600	0.140407		I	1133000	0.82018		I	1207100	0.872293		I	1037700	0.355996		I	1068900	0.638957		I	1108400	0.590252
chrI	1340700	0.58492		I	1169600	0.546104		I	1248800	0.788773		I	1072600	0.695124		I	1111800	0.31467		I	1167200	0.48055
chrI	1379200	0.356676		I	1207000	0.914912		I	1288800	0.473444		I	1112300	0.373253		I	1132900	0.720778		I	1207000	0.861831
chrI	1401700	0.306358		I	1248300	0.855501		I	1339000	0.406987		I	1166200	0.467428		I	1164900	0.551273		I	1233300	0.683093
chrI	1440500	0.680101		I	1289300	0.6278		I	1376500	0.724787		I	1208500	0.946233		I	1207100	0.850378		I	1285500	0.629044
chrI	1514300	0.211928		I	1316200	0.43724		I	1407300	0.538296		I	1248700	0.842175		I	1233300	0.701788		I	1325400	0.598443
chrI	1559100	0.72238		I	1335500	0.64043		I	1440600	0.55257		I	1289100	0.604325		I	1248600	0.701788		I	1376400	0.661779
chrI	1580800	0.40765		I	1380100	0.680122		I	1494400	0.379618		I	1330300	0.418624		I	1289100	0.403636		I	1413400	0.530724
chrI	1651000	0.535605		I	1407500	0.731074		I	1539900	0.466681		I	1358500	0.718269		I	1333500	0.629176		I	1439000	0.752032
chrI	1696400	0.749406		I	1439800	0.663964		I	1558800	0.702683		I	1380600	0.563518		I	1359100	0.28318		I	1460600	0.524609
chrI	1719400	0.627961		I	1494400	0.473487		I	1581400	0.688585		I	1407300	0.809958		I	1383000	0.325841		I	1501600	0.334833
chrI	1745600	0.242765		I	1533700	0.572402		I	1605800	0.289416		I	1440700	0.737599		I	1406700	0.528714		I	1537100	0.77098
chrI	1834900	0.91572		I	1562900	0.474042		I	1653400	0.436511		I	1494100	0.605125		I	1440500	0.407786		I	1566100	0.77932
chrI	1870100	0.136983		I	1587300	0.431121		I	1693900	0.636997		I	1539700	0.542218		I	1494200	0.249853		I	1607200	0.484976
chrI	1895600	0.187602		I	1607300	0.476501		I	1721200	0.430645		I	1565700	0.609513		I	1540500	0.281398		I	1653800	0.352476
chrI	1945000	0.273195		I	1622800	0.666756		I	1741100	0.431736		I	1587400	0.613693		I	1562600	0.465081		I	1673600	0.397806
chrI	1977500	0.751127		I	1653300	0.35241		I	1834300	0.92314		I	1605800	0.40558		I	1588200	0.189296		I	1696600	0.638347
chrI	2036400	0.423252		I	1673400	0.547425		I	1910000	0.280683		I	1624200	0.285505		I	1622000	0.580446		I	1718200	0.694563
chrI	2070300	0.650782		I	1694100	0.75966		I	1948600	0.587242		I	1653400	0.21689		I	1653400	0.291505		I	1746100	0.282287
chrI	2095100	0.569314		I	1721800	0.628739		I	1977600	0.627853		I	1693500	0.801962		I	1674200	0.41778		I	1771100	0.827947
chrI	2154700	0.836585		I	1746400	0.406569		I	2012100	0.332989		I	1718400	0.444864		I	1693600	0.42122		I	1802400	0.157381
chrI	2181600	0.329232		I	1829800	0.916526		I	2040900	0.410069		I	1740800	0.535419		I	1718100	0.510762		I	1834900	0.843011
chrI	2292900	0.549945		I	1874800	0.315681		I	2071200	0.579903		I	1789800	0.734313		I	1746200	0.449158		I	1860100	0.344069
chrI	2317500	0.503184		I	1910000	0.520308		I	2091600	0.611701		I	1833500	0.929716		I	1771500	0.626587		I	1912600	0.654928
chrI	2342500	0.376677		I	1949400	0.752226		I	2151000	0.901537		I	1858800	0.417279		I	1798400	0.368825		I	1949500	0.64132
chrI	2401500	0.372557		I	1979700	0.594463		I	2175800	0.568739		I	1884200	0.431122		I	1827700	0.820158		I	1983900	0.285108
chrI	2434300	0.60399		I	2006700	0.427782		I	2203900	0.352504		I	1909800	0.346986		I	1860100	0.144		I	2006200	0.314783
chrI	2492300	0.110416		I	2041200	0.717841		I	2299000	0.92868		I	1945900	0.767211		I	1913300	0.535968		I	2041000	0.808851
chrI	2512400	0.259127		I	2071000	0.556974		I	2317700	0.733185		I	1984000	0.594431		I	1948400	0.480993		I	2070600	0.643679
chrI	2591900	0.333194		I	2091400	0.544157		I	2432900	0.640095		I	2007400	0.451536		I	1984000	0.487055		I	2095800	0.541821
chrI	2631700	0.380843		I	2151100	0.822987		I	2464200	0.261232		I	2041100	0.441789		I	2006700	0.359294		I	2136100	0.380978
chrI	2708500	0.26692		I	2172500	0.722535		I	2510400	0.450391		I	2070900	0.693899		I	2040900	0.665005		I	2156500	0.720401
chrI	2732400	0.767097		I	2204300	0.357333		I	2553300	0.205121		I	2095000	0.516576		I	2071200	0.421958		I	2181600	0.490148
chrI	2750200	0.571789		I	2224000	0.326581		I	2582700	0.105436		I	2151500	0.85931		I	2095700	0.532034		I	2243800	0.208814
chrI	2832400	0.933965		I	2243600	0.268751		I	2708500	0.538305		I	2204200	0.475059		I	2136900	0.353412		I	2293300	0.678318
chrI	2886800	0.80357		I	2281400	0.424699		I	2754000	0.679396		I	2223700	0.264888		I	2155800	0.712689		I	2333200	0.44932
chrI	2929500	0.499146		I	2299700	0.882371		I	2832400	0.936493		I	2298200	0.750439		I	2180300	0.474277		I	2390400	0.478629
chrI	2965700	0.631186		I	2317500	0.702742		I	2886000	0.592978		I	2317700	0.750226		I	2204100	0.324463		I	2437200	0.542379
chrI	3033700	0.464084		I	2396100	0.734618		I	2902800	0.506135		I	2387100	0.461622		I	2243800	0.26207		I	2463800	0.488309
chrI	3100900	0.603841		I	2432400	0.713414		I	2965600	0.792359		I	2429900	0.497158		I	2283000	0.514269		I	2505500	0.713154
chrI	3157600	0.612444		I	2513600	0.769557		I	3034700	0.83648		I	2464600	0.458421		I	2390800	0.72577		I	2632800	0.348057
chrI	3217800	0.574058		I	2553200	0.276198		I	3071700	0.378882		I	2510600	0.654089		I	2436600	0.425921		I	2665500	0.188743
chrI	3266600	0.543672		I	2582700	0.296662		I	3090200	0.757407		I	2556400	0.074215		I	2463800	0.138677		I	2708400	0.478899
chrI	3336800	0.562676		I	2759100	0.637115		I	3129600	0.131124		I	2632500	0.533309		I	2512100	0.265243		I	2759200	0.598273
chrI	3409300	0.420956		I	2802900	0.277873		I	3198800	0.321516		I	2708500	0.82093		I	2530900	0.400749		I	2803800	0.344079
chrI	3465700	0.502428		I	2827500	0.889144		I	3220700	0.405946		I	2754100	0.656173		I	2553400	0.105259		I	2841400	0.864402
chrI	3502300	0.490283		I	2868600	0.258683		I	3246300	0.601436		I	2802700	0.255521		I	2575100	0.134088		I	2902800	0.590195
chrI	3553600	0.439416		I	2903000	0.420907		I	3263500	0.651791		I	2841600	0.612078		I	2601200	0.228159		I	2940200	0.367724
chrI	3604100	0.740069		I	2940200	0.553161		I	3336800	0.701702		I	2887700	0.616274		I	2629500	0.288726		I	2965400	0.511806
chrI	3639300	0.402442		I	2966500	0.334943		I	3412200	0.455013		I	2910000	0.559594		I	2708500	0.707239		I	2986700	0.399264
chrI	3723100	0.550865		I	2986000	0.476039		I	3462400	0.816888		I	2940200	0.376263		I	2759900	0.475485		I	3044100	0.420148
chrI	3788600	0.660439		I	3034700	0.443309		I	3487800	0.628388		I	2968100	0.792067		I	2803000	0.181051		I	3069000	0.0974563
chrI	3831500	0.490592		I	3071700	0.706298		I	3527400	0.52699		I	3034600	0.739811		I	2827500	0.775332		I	3111000	0.664088
chrI	3868200	0.554748		I	3090000	0.634414		I	3558900	0.786564		I	3071500	0.483615		I	2902400	0.517681		I	3130100	0.547486
chrI	3908000	0.412735		I	3129900	0.206924		I	3602500	0.798164		I	3088900	0.798476		I	2940200	0.397749		I	3156700	0.302961
chrI	3958200	0.395236		I	3171200	0.712176		I	3693800	0.175297		I	3106600	0.72587		I	2965800	0.516023		I	3177200	0.548998
chrI	3998300	0.767152		I	3199500	0.561733		I	3723200	0.65562		I	3129800	0.238387		I	2999000	0.311102		I	3217500	0.651424
chrI	4034300	0.748824		I	3220800	0.476403		I	3788400	0.185959		I	3171300	0.571122		I	3034600	0.610736		I	3246400	0.566762
chrI	4139600	0.900092		I	3263000	0.595185		I	3826200	0.40996		I	3217400	0.618881		I	3069800	0.182518		I	3319100	0.421841
chrI	4178300	0.3695		I	3319800	0.562067		I	3846200	0.663822		I	3246600	0.786807		I	3091900	0.279814		I	3336900	0.711069
chrI	4198900	0.646185		I	3336800	0.715853		I	3871100	0.26125		I	3319700	0.855256		I	3129500	0.136721		I	3401500	0.273767
chrI	4257300	0.574455		I	3412100	0.511029		I	3907300	0.501274		I	3336800	0.855256		I	3156700	0.158567		I	3460400	0.744411
chrI	4298000	0.835619		I	3437600	0.126317		I	3959500	0.344962		I	3366000	0.152405		I	3220700	0.393971		I	3501900	0.56427
chrI	4319300	0.725695		I	3462600	0.844412		I	3996900	0.775564		I	3420900	0.692168		I	3246400	0.460187		I	3528300	0.716363
chrI	4382100	0.781474		I	3526800	0.689537		I	4033800	0.803747		I	3462400	0.435628		I	3264200	0.662756		I	3559700	0.562475
chrI	4427000	0.133502		I	3558600	0.783984		I	4140400	0.733806		I	3487800	0.611686		I	3319500	0.473601		I	3602300	0.743815
chrI	4452900	0.638251		I	3602800	0.71823		I	4198900	0.76301		I	3526600	0.699896		I	3338200	0.682089		I	3641500	0.142354
chrI	4494100	0.323745		I	3693400	0.346446		I	4266500	0.635907		I	3559100	0.792178		I	3405400	0.625848		I	3664100	0.393314
chrI	4535900	0.699257		I	3722800	0.738791		I	4301200	0.913409		I	3602300	0.730385		I	3465500	0.707432		I	3699600	0.43881
chrI	4584000	0.576059		I	3757200	0.201382		I	4385000	0.641749		I	3625300	0.663804		I	3499300	0.301479		I	3723400	0.822505
chrI	4654300	0.647011		I	3783600	0.0837534		I	4451500	0.404758		I	3693700	0.207698		I	3530300	0.235578		I	3752300	0.203624
chrI	4701200	0.860139		I	3825500	0.503065		I	4494000	0.158144		I	3723300	0.801422		I	3556900	0.508246		I	3792000	0.631494
chrI	4752200	0.486399		I	3846200	0.414272		I	4526700	0.682955		I	3757600	0.268721		I	3602400	0.719455		I	3831900	0.819075
chrI	4766100	0.497524		I	3870300	0.268995		I	4554700	0.089919		I	3794200	0.214636		I	3635900	0.188628		I	3869900	0.435813
chrI	4790600	0.603716		I	3903200	0.593926		I	4582300	0.850902		I	3825700	0.368461		I	3697400	0.199763		I	3904000	0.503286
chrI	4827000	0.119942		I	3932200	0.395808		I	4659300	0.84518		I	3846200	0.655657		I	3723200	0.694142		I	3955300	0.620957
chrI	4847900	0.295992		I	3960000	0.550592		I	4701400	0.775816		I	3893000	0.58694		I	3756300	0.148585		I	3997200	0.696919
chrI	4910200	0.492397		I	3991000	0.834736		I	4764900	0.430745		I	3960300	0.370842		I	3791600	0.320843		I	4035300	0.792384
chrI	4932800	0.854326		I	4034200	0.864358		I	4790100	0.660114		I	3991700	0.81752		I	3826200	0.721592		I	4084600	0.32967
chrI	4971500	0.422065		I	4076800	0.234945		I	4841600	0.374187		I	4034300	0.764723		I	3867500	0.423731		I	4125900	0.491692
chrI	4994200	0.592662		I	4110900	0.461006		I	4875000	0.187183		I	4144400	0.854806		I	3904100	0.540755		I	4181200	0.631318
chrI	5080000	0.413117		I	4144300	0.631393		I	4931600	0.831681		I	4198800	0.771288		I	3958700	0.598517		I	4198400	0.516394
chrI	5134400	0.681628		I	4198800	0.683481		I	4970200	0.526919		I	4236300	0.397823		I	3997200	0.681652		I	4236900	0.44501
chrI	5165100	0.603528		I	4241800	0.414206		I	4994600	0.580546		I	4266800	0.691638		I	4037400	0.808934		I	4263800	0.644979
chrI	5222300	0.482752		I	4267800	0.708254		I	5080800	0.40148		I	4300900	0.945833		I	4083900	0.304835		I	4296400	0.79867
chrI	5290800	0.396075		I	4300900	1		I	5114200	0.394107		I	4357400	0.572906		I	4110800	0.310558		I	4319300	0.75526
chrI	5315400	0.772931		I	4385000	0.785704		I	5132900	0.652761		I	4385200	0.686671		I	4181400	0.627563		I	4360000	0.521725
chrI	5355100	0.345068		I	4451700	0.581989		I	5167100	0.463397		I	4451700	0.645167		I	4202700	0.42419		I	4385600	0.650443
chrI	5376300	0.426097		I	4526900	0.652159		I	5220700	0.639018		I	4469300	0.480944		I	4236700	0.257489		I	4422600	0.194913
chrI	5422900	0.62062		I	4557600	0.206351		I	5268700	0.376384		I	4494400	0.189411		I	4263800	0.689418		I	4463800	0.155794
chrI	5486100	0.533398		I	4581700	0.760683		I	5313300	0.834627		I	4526500	0.687645		I	4299300	0.706508		I	4495400	0.526877
chrI	5516400	0.35773		I	4615200	0.256947		I	5360600	0.273801		I	4555600	0.177415		I	4385300	0.677617		I	4518600	0.554758
chrI	5547600	0.168522		I	4653900	0.758268		I	5421300	0.795112		I	4581200	0.833647		I	4452200	0.378132		I	4556800	0.30204
chrI	5595800	0.274271		I	4701000	0.711822		I	5488000	0.688141		I	4618800	0.227598		I	4495400	0.370598		I	4580600	0.38814
chrI	5620400	0.403215		I	4745700	0.271336		I	5519000	0.480654		I	4659300	0.802858		I	4518600	0.639937		I	4675800	0.550136
chrI	5661700	0.376918		I	4765400	0.385275		I	5581600	0.285804		I	4701000	0.555947		I	4557200	0.201164		I	4701300	0.524191
chrI	5697400	0.46183		I	4789500	0.711355		I	5612300	0.590972		I	4765000	0.410436		I	4579700	0.3374		I	4793400	0.602854
chrI	5743600	0.115315		I	4841000	0.425793		I	5660100	0.263935		I	4790100	0.734307		I	4622700	0.40073		I	4820200	0.318943
chrI	5822200	0.787797		I	4874900	0.453966		I	5697900	0.674031		I	4841500	0.359082		I	4655800	0.445277		I	4845600	0.474401
chrI	5870700	0.566937		I	4931600	0.858372		I	5748000	0.261016		I	4875000	0.407776		I	4676100	0.238444		I	4875700	0.159102
chrI	5930200	0.262173		I	4970200	0.653258		I	5772800	0.311253		I	4931600	0.766714		I	4701300	0.580664		I	4909500	0.171009
chrI	5983000	0.533573		I	4993400	0.610303		I	5823000	0.81137		I	4971800	0.655129		I	4748600	0.68224		I	4936000	0.6889
chrI	6000700	0.336847		I	5040100	0.242377		I	5874800	0.695585		I	5040200	0.231665		I	4765700	0.487998		I	4971100	0.697125
chrI	6077500	0.775654		I	5080800	0.628169		I	5937200	0.613159		I	5080900	0.374442		I	4790700	0.582026		I	5040100	0.420675
chrI	6152300	0.659869		I	5112700	0.428918		I	5975800	0.408003		I	5112900	0.268358		I	4841200	0.369597		I	5065500	0.220118
chrI	6173200	0.864102		I	5136500	0.619545		I	5998700	0.630842		I	5136700	0.55105		I	4875100	0.214252		I	5116400	0.291773
chrI	6219100	0.30517		I	5167400	0.556285		I	6014900	0.404486		I	5170400	0.612869		I	4928000	0.632379		I	5141300	0.484012
chrI	6236100	0.217411		I	5223700	0.533362		I	6066300	0.843516		I	5226700	0.754684		I	4970300	0.399779		I	5175000	0.257125
chrI	6284500	0.897021		I	5268700	0.452466		I	6081600	0.736709		I	5268600	0.507812		I	5040200	0.215643		I	5202500	0.25227
chrI	6342200	0.163859		I	5315300	0.79368		I	6150700	0.849785		I	5314600	0.840897		I	5082200	0.207165		I	5223400	0.53543
chrI	6372400	0.557708		I	5357800	0.375237		I	6217000	0.406054		I	5360500	0.333015		I	5116400	0.406311		I	5268900	0.196921
chrI	6415700	0.406706		I	5421500	0.825678		I	6279400	0.938453		I	5395500	0.266229		I	5136100	0.654959		I	5320700	0.728802
chrI	6458000	0.624691		I	5459800	0.256363		I	6371300	0.459338		I	5420700	0.620451		I	5167500	0.639919		I	5358300	0.39319
chrI	6490200	0.230908		I	5487800	0.64711		I	6404200	0.145589		I	5467400	0.183526		I	5223200	0.429449		I	5376500	0.220497
chrI	6580100	0.717627		I	5518900	0.592912		I	6442500	0.251949		I	5492600	0.525186		I	5268600	0.687853		I	5400900	0.288929
chrI	6613700	0.282998		I	5551700	0.430918		I	6468000	0.656625		I	5519000	0.450515		I	5319700	0.614377		I	5419000	0.301658
chrI	6717600	0.307585		I	5581500	0.243746		I	6498300	0.376301		I	5581700	0.152837		I	5360900	0.534244		I	5492600	0.485732
chrI	6745600	0.725275		I	5612000	0.408474		I	6575800	0.742336		I	5612300	0.569763		I	5376700	0.534244		I	5519000	0.585195
chrI	6799900	0.578369		I	5660000	0.203687		I	6614400	0.323606		I	5660100	0.292827		I	5421300	0.44671		I	5575900	0.222805
chrI	6847500	0.459209		I	5697400	0.65264		I	6713100	0.253748		I	5697400	0.667429		I	5492500	0.550172		I	5620900	0.65196
chrI	6883000	0.501179		I	5744200	0.408178		I	6746200	0.757226		I	5744300	0.480105		I	5518900	0.510152		I	5661800	0.483338
chrI	6923800	0.350768		I	5773000	0.566841		I	6797700	0.54963		I	5772700	0.437949		I	5611300	0.631546		I	5697800	0.66553
chrI	6950200	0.559555		I	5827500	0.688545		I	6845900	0.470557		I	5822900	0.792521		I	5660100	0.319055		I	5728100	0.252847
chrI	6998200	0.297123		I	5874800	0.66953		I	6897800	0.213476		I	5875100	0.655394		I	5697600	0.655912		I	5764400	0.650928
chrI	7023100	0.601843		I	5899900	0.484627		I	6923800	0.269594		I	5937400	0.63824		I	5744300	0.19792		I	5822400	0.488011
chrI	7085100	0.874417		I	5937500	0.806355		I	6949100	0.471601		I	5974800	0.482743		I	5822500	0.5297		I	5876100	0.659689
chrI	7151800	0.624692		I	5974600	0.650125		I	6977500	0.477522		I	5999200	0.832568		I	5874900	0.70563		I	5929900	0.320657
chrI	7192800	0.734564		I	5999000	0.884524		I	7005500	0.294896		I	6045400	0.689254		I	5937400	0.389526		I	5977200	0.396235
chrI	7251600	0.487041		I	6014500	0.306644		I	7024700	0.685828		I	6063400	0.842547		I	5977200	0.516047		I	6014100	0.629543
chrI	7315600	0.736298		I	6036700	0.145264		I	7089400	0.868506		I	6081900	0.842547		I	6014600	0.353462		I	6043900	0.224339
chrI	7348800	0.187174		I	6063100	0.832358		I	7149800	0.670662		I	6149500	0.616395		I	6040400	0.176094		I	6066900	0.829917
chrI	7471900	0.962331		I	6081800	0.780506		I	7193600	0.74573		I	6173700	0.784644		I	6064500	0.752914		I	6082200	0.53612
chrI	7495800	0.78929		I	6116900	0.482467		I	7252200	0.429918		I	6219700	0.292531		I	6082200	0.531942		I	6101800	0.466541
chrI	7519200	0.55739		I	6149800	0.484774		I	7314800	0.611343		I	6278200	0.925085		I	6102600	0.270801		I	6123600	0.165457
chrI	7546000	0.677762		I	6173000	0.730353		I	7353800	0.268144		I	6330700	0.351634		I	6173100	0.703387		I	6217200	0.324736
chrI	7591100	0.210024		I	6219800	0.582975		I	7375600	0.381535		I	6371400	0.430827		I	6217000	0.451134		I	6278800	0.660511
chrI	7653000	0.407377		I	6279300	0.900709		I	7472800	0.956141		I	6403800	0.130611		I	6276800	0.706904		I	6341800	0.488141
chrI	7714900	0.833196		I	6340600	0.335451		I	7497600	0.595355		I	6440800	0.185545		I	6340800	0.464481		I	6371900	0.413797
chrI	7776100	0.65133		I	6371300	0.48306		I	7520700	0.562996		I	6472200	0.676437		I	6371400	0.472001		I	6445900	0.53141
chrI	7865900	0.717565		I	6403800	0.272693		I	7554000	0.600805		I	6504200	0.539484		I	6404100	0.333266		I	6462200	0.724987
chrI	7940800	0.790929		I	6442500	0.228903		I	7591400	0.463829		I	6575900	0.733415		I	6443900	0.644175		I	6483100	0.231333
chrI	7969300	0.428779		I	6468100	0.716476		I	7651400	0.365391		I	6614600	0.370466		I	6462200	0.177795		I	6504500	0.446815
chrI	8049600	0.830741		I	6498300	0.51754		I	7678100	0.0919962		I	6649500	0.244525		I	6498200	0.526122		I	6574900	0.722302
chrI	8135500	0.769832		I	6575800	0.714932		I	7716300	0.786827		I	6711800	0.229372		I	6554800	0.343873		I	6614000	0.329253
chrI	8225100	0.607096		I	6613700	0.511133		I	7776800	0.387921		I	6746700	0.449877		I	6575000	0.502247		I	6666900	0.236512
chrI	8287400	0.317219		I	6706000	0.374665		I	7830300	0.401049		I	6797700	0.528957		I	6614200	0.301964		I	6713300	0.224754
chrI	8329500	0.509893		I	6740600	0.41991		I	7862600	0.649435		I	6845900	0.467083		I	6665500	0.131142		I	6738000	0.366739
chrI	8412500	0.566029		I	6763300	0.47295		I	7937800	0.718732		I	6897500	0.19156		I	6713300	0.244376		I	6763200	0.532522
chrI	8433400	0.749783		I	6797500	0.497808		I	7970700	0.211274		I	6923700	0.265469		I	6739300	0.316651		I	6800300	0.64148
chrI	8485300	0.247988		I	6845800	0.487449		I	8008400	0.254392		I	6949000	0.460513		I	6763100	0.415832		I	6846100	0.453575
chrI	8513400	0.395768		I	6897600	0.26508		I	8040600	0.666913		I	6977800	0.612548		I	6799700	0.617517		I	6874100	0.295996
chrI	8569800	0.193539		I	6923500	0.637964		I	8059300	0.785635		I	7007000	0.545091		I	6849500	0.431068		I	6923700	0.139947
chrI	8600100	0.587782		I	6948800	0.498177		I	8135100	0.842994		I	7027900	0.53004		I	6874300	0.19829		I	6949300	0.535626
chrI	8636500	0.593649		I	6977800	0.650864		I	8225000	0.71877		I	7089600	0.718161		I	6923500	0.421322		I	6975800	0.35426
chrI	8696400	0.414116		I	7002800	0.379946		I	8260000	0.152872		I	7158100	0.529652		I	6949400	0.569792		I	7002200	0.358019
chrI	8726100	0.207957		I	7023700	0.698897		I	8284800	0.369629		I	7197900	0.738248		I	6975700	0.244956		I	7023400	0.333297
chrI	8762700	0.700744		I	7089700	0.86636		I	8312500	0.317982		I	7252200	0.361275		I	7002600	0.315562		I	7089900	0.475117
chrI	8788500	0.119288		I	7157200	0.687452		I	8333100	0.317455		I	7314700	0.428143		I	7023900	0.627344		I	7115000	0.251479
chrI	8813200	0.558024		I	7197100	0.697121		I	8375400	0.456649		I	7353800	0.242205		I	7089800	0.777633		I	7134200	0.118592
chrI	8845300	0.236113		I	7252100	0.56379		I	8413800	0.581458		I	7375300	0.420456		I	7155700	0.585135		I	7156700	0.560943
chrI	8865300	0.379751		I	7315000	0.64911		I	8432500	0.732963		I	7407800	0.160157		I	7193200	0.329511		I	7192300	0.483352
chrI	8916600	0.307128		I	7353600	0.320773		I	8485400	0.577294		I	7472900	0.941273		I	7252000	0.533495		I	7251900	0.409524
chrI	8959800	0.332055		I	7377600	0.411625		I	8513400	0.604383		I	7514500	0.518443		I	7315200	0.465589		I	7320400	0.65122
chrI	8980100	0.645054		I	7408200	0.369038		I	8570000	0.267848		I	7554100	0.618759		I	7353900	0.186022		I	7335200	0.590948
chrI	9015000	0.546485		I	7472800	0.872853		I	8589600	0.3536		I	7591700	0.422982		I	7375800	0.436536		I	7353900	0.442911
chrI	9042200	0.311073		I	7497200	0.540413		I	8609000	0.39844		I	7652100	0.292534		I	7404700	0.259118		I	7371300	0.387981
chrI	9099800	0.289081		I	7520600	0.573099		I	8631100	0.205662		I	7678200	0.103438		I	7470000	0.824695		I	7404700	0.117791
chrI	9125400	0.544864		I	7554100	0.553019		I	8653800	0.641089		I	7716900	0.787042		I	7497600	0.312746		I	7444500	0.17736
chrI	9163700	0.621478		I	7591500	0.497369		I	8689500	0.302033		I	7772600	0.295057		I	7519600	0.565058		I	7469800	0.797335
chrI	9248400	0.181601		I	7651700	0.311511		I	8725300	0.143643		I	7835400	0.509565		I	7553900	0.486882		I	7520600	0.528882
chrI	9296900	0.474916		I	7678200	0.240579		I	8762700	0.698122		I	7862600	0.46094		I	7591000	0.362097		I	7554000	0.533667
chrI	9313500	0.674006		I	7715600	0.452006		I	8793000	0.276718		I	7944800	0.609112		I	7651200	0.446674		I	7653000	0.393797
chrI	9375700	0.692859		I	7776500	0.650879		I	8813100	0.470173		I	7970700	0.186681		I	7675800	0.177347		I	7676100	0.730256
chrI	9414500	0.53101		I	7835200	0.567664		I	8845800	0.358561		I	8008400	0.422027		I	7716200	0.436618		I	7720800	0.711031
chrI	9446900	0.575906		I	7862900	0.606893		I	8862800	0.358561		I	8044000	0.760989		I	7776800	0.461078		I	7759900	0.529247
chrI	9473800	0.282126		I	7944900	0.423217		I	8918300	0.520267		I	8059100	0.722136		I	7831100	0.257234		I	7776800	0.345039
chrI	9516400	0.195874		I	7970000	0.317165		I	8961200	0.324132		I	8134900	0.86898		I	7862600	0.564399		I	7831100	0.559707
chrI	9545700	0.335895		I	8008600	0.245395		I	9000500	0.482978		I	8226000	0.601465		I	7938100	0.632753		I	7869400	0.577533
chrI	9583800	0.28455		I	8059100	0.667632		I	9045300	0.197145		I	8263400	0.368959		I	8007700	0.242935		I	7940200	0.735054
chrI	9623600	0.646443		I	8098500	0.138323		I	9084500	0.647589		I	8282800	0.252382		I	8037700	0.365408		I	7981800	0.269929
chrI	9660700	0.514394		I	8129100	0.823211		I	9110800	0.595157		I	8311800	0.258092		I	8059500	0.636545		I	8007500	0.382366
chrI	9730700	0.667036		I	8160400	0.309918		I	9160600	0.631249		I	8348900	0.48654		I	8135500	0.68113		I	8055100	0.724834
chrI	9788300	0.598459		I	8224800	0.791534		I	9222900	0.303121		I	8375100	0.52026		I	8224800	0.402974		I	8113600	0.47751
chrI	9857200	0.725509		I	8259300	0.431199		I	9251000	0.14032		I	8398200	0.277571		I	8259900	0.37898		I	8136800	0.75806
chrI	9903100	0.327255		I	8293700	0.286736		I	9313500	0.70112		I	8418400	0.730394		I	8287300	0.282786		I	8225500	0.370311
chrI	9938700	0.193968		I	8335700	0.591862		I	9377000	0.447368		I	8432500	0.700216		I	8333300	0.291144		I	8262600	0.33628
chrI	9987300	0.789086		I	8349000	0.54729		I	9416700	0.734924		I	8485100	0.794413		I	8370100	0.414937		I	8333400	0.494714
chrI	10036700	0.311429		I	8374400	0.498137		I	9449600	0.515613		I	8517600	0.613746		I	8418100	0.48759		I	8376300	0.590978
chrI	10076500	0.109241		I	8393100	0.446863		I	9475800	0.169004		I	8570100	0.292226		I	8433000	0.629875		I	8393000	0.436893
chrI	10181200	0.743515		I	8432500	0.671627		I	9517100	0.638116		I	8584800	0.637517		I	8485100	0.618516		I	8418100	0.633779
chrI	10235300	0.68913		I	8485100	0.499155		I	9549600	0.520915		I	8609100	0.279588		I	8521300	0.302527		I	8485000	0.323198
chrI	10294600	0.625446		I	8513400	0.359446		I	9579300	0.322025		I	8631200	0.271036		I	8569300	0.156878		I	8517100	0.384094
chrI	10335300	0.48584		I	8569900	0.282083		I	9624000	0.617433		I	8652900	0.603426		I	8637900	0.284209		I	8562300	0.713325
chrI	10371300	0.596917		I	8592100	0.364985		I	9661100	0.469339		I	8689700	0.368462		I	8689900	0.291392		I	8600100	0.315167
chrI	10435800	0.842258		I	8638000	0.686667		I	9728300	0.681337		I	8716100	0.271442		I	8769600	0.632722		I	8635300	0.552698
chrI	10477900	0.697282		I	8653700	0.686667		I	9788300	0.63706		I	8743200	0.320068		I	8793100	0.239895		I	8664600	0.15868
chrI	10562800	0.777035		I	8689700	0.369768		I	9853400	0.849729		I	8770200	0.653971		I	8813000	0.425215		I	8689400	0.242002
chrI	10590800	0.503628		I	8725300	0.511868		I	9904000	0.805239		I	8793200	0.432297		I	8862500	0.509021		I	8716600	0.417299
chrI	10636600	0.390903		I	8742800	0.317719		I	9935700	0.578676		I	8819200	0.170204		I	8917800	0.521644		I	8769600	0.736167
chrI	10668900	0.144451		I	8763600	0.641177		I	9987400	0.724021		I	8862500	0.380756		I	8962000	0.246959		I	8793500	0.238353
chrI	10687000	0.568468		I	8792800	0.319519		I	10045000	0.265769		I	8918700	0.42937		I	8980100	0.228021		I	8819200	0.275818
chrI	10725500	0.632662		I	8812800	0.552499		I	10069600	0.348361		I	8947600	0.537269		I	9015600	0.506439		I	8853900	0.554154
chrI	10771900	0.40914		I	8839300	0.517799		I	10110900	0.626604		I	8996000	0.447185		I	9041400	0.185464		I	8870300	0.548646
chrI	10821500	0.667257		I	8862900	0.292914		I	10176600	0.571206		I	9041200	0.139454		I	9063800	0.197722		I	8921400	0.240026
chrI	10900600	0.276617		I	8918100	0.669855		I	10238400	0.83869		I	9084600	0.325281		I	9084400	0.346869		I	8957500	0.492447
chrI	10933600	0.433611		I	8961400	0.493806		I	10259300	0.769554		I	9111600	0.285138		I	9111700	0.510349		I	8985300	0.676832
chrI	10962900	0.287926		I	9000600	0.465094		I	10303000	0.899629		I	9166300	0.610028		I	9166400	0.638702		I	9015700	0.541942
chrI	10991200	0.104448		I	9015800	0.643935		I	10335700	0.338567		I	9222800	0.569723		I	9251000	0.20426		I	9045600	0.230582
chrI	11060600	0.393194		I	9040900	0.379454		I	10371200	0.592537		I	9250800	0.221942		I	9287900	0.302408		I	9065900	0.205577
chrI	11098100	0.84941		I	9063800	0.338721		I	10402900	0.282842		I	9281500	0.197769		I	9313500	0.554837		I	9094000	0.473507
chrI	11124800	0.458947		I	9084400	0.516644		I	10442200	0.791857		I	9305800	0.650608		I	9338900	0.199794		I	9125900	0.408926
chrI	11167800	0.313616		I	9111600	0.540353		I	10483600	0.716478		I	9376600	0.75465		I	9377000	0.408751		I	9166800	0.559836
chrI	11203000	0.828685		I	9160800	0.691623		I	10522900	0.255627		I	9416700	0.724088		I	9414400	0.428175		I	9190500	0.442258
chrI	11292400	0.462262		I	9216100	0.380229		I	10557300	0.795799		I	9450600	0.507752		I	9450500	0.555153		I	9247700	0.217716
chrI	11359300	0.426966		I	9250800	0.231802		I	10586800	0.536995		I	9476800	0.223058		I	9475600	0.220852		I	9287600	0.376748
chrI	11399100	0.204234		I	9281500	0.50279		I	10606300	0.53253		I	9517100	0.272412		I	9502400	0.526529		I	9304300	0.557291
chrI	11418000	0.517289		I	9306000	0.7581		I	10644400	0.414461		I	9552900	0.751359		I	9516900	0.224401		I	9339400	0.20847
chrI	11447200	0.29206		I	9339200	0.232227		I	10669100	0.588946		I	9605500	0.243382		I	9542600	0.482015		I	9356600	0.122137
chrI	11480500	0.129196		I	9376900	0.528707		I	10726000	0.53214		I	9628700	0.409484		I	9584100	0.136434		I	9377600	0.793634
chrI	11512500	0.528344		I	9416600	0.728774		I	10750100	0.238561		I	9659600	0.309831		I	9605400	0.175115		I	9411800	0.487497
chrI	11555400	0.415974		I	9448700	0.669061		I	10773300	0.250343		I	9728500	0.543099		I	9628500	0.381155		I	9450200	0.584348
chrI	11588900	0.46014		I	9476700	0.256354		I	10819700	0.59998		I	9748700	0.733984		I	9659700	0.481474		I	9479300	0.185418
chrI	11609900	0.720651		I	9517200	0.625725		I	10845000	0.571998		I	9788400	0.632574		I	9687300	0.209752		I	9494300	0.403063
chrI	11668000	0.78088		I	9550500	0.575515		I	10897900	0.543434		I	9852000	0.767532		I	9728700	0.723962		I	9517000	0.137096
chrI	11792400	0.60974		I	9584000	0.21457		I	10929300	0.492758		I	9873800	0.707834		I	9788800	0.518		I	9542200	0.661329
chrI	11821300	0.49388		I	9624100	0.70874		I	10962900	0.427276		I	9896300	0.299688		I	9849000	0.720356		I	9605500	0.165237
chrI	11872200	0.602859		I	9661000	0.470284		I	11012000	0.256109		I	9921000	0.726987		I	9874400	0.598345		I	9626500	0.231574
chrI	11912000	0.344148		I	9728200	0.510875		I	11055200	0.252134		I	9987400	0.580405		I	9900000	0.261422		I	9652900	0.443021
chrI	11931900	0.473533		I	9748200	0.648982		I	11105000	0.650314		I	10014400	0.310254		I	9927500	0.512977		I	9687200	0.197378
chrI	12006100	0.411088		I	9788800	0.664186		I	11141400	0.23812		I	10045100	0.224371		I	9987300	0.520521		I	9733700	0.743369
chrI	12043000	0.584195		I	9854100	0.774315		I	11167000	0.684168		I	10069600	0.397251		I	10045700	0.14949		I	9777900	0.404846
chrI	12065300	0.714064		I	9869400	0.763729		I	11199600	0.704759		I	10107600	0.727847		I	10070000	0.146121		I	9808700	0.448708
chrI	12145400	0.438075		I	9896100	0.23327		I	11234700	0.167354		I	10129600	0.642511		I	10111100	0.585178		I	9848900	0.749902
chrI	12194000	0.413094		I	9932500	0.599665		I	11292100	0.56823		I	10173600	0.672586		I	10176800	0.470965		I	9874900	0.619372
chrI	12229000	0.541336		I	9962400	0.104406		I	11355700	0.792833		I	10216200	0.562817		I	10235900	0.566		I	9901000	0.440624
chrI	12284300	0.488506		I	9987300	0.746755		I	11401000	0.447277		I	10239200	0.707506		I	10259300	0.678404		I	9925700	0.381499
chrI	12332900	0.295984		I	10014800	0.385918		I	11447900	0.661729		I	10259100	0.851222		I	10330800	0.647386		I	9981200	0.42976
chrI	12425900	0.561784		I	10045200	0.396368		I	11480400	0.145621		I	10303000	0.904235		I	10371800	0.409536		I	10000500	0.607686
chrI	12482400	0.708753		I	10070300	0.446655		I	11512800	0.58082		I	10327400	0.32126		I	10402800	0.468728		I	10046300	0.143262
chrI	12532300	0.533474		I	10111200	0.66893		I	11565100	0.463126		I	10371200	0.609596		I	10426400	0.318409		I	10061900	0.302816
chrI	12597800	0.804553		I	10176500	0.449182		I	11589100	0.473676		I	10403100	0.280813		I	10442600	0.622348		I	10094100	0.668995
chrI	12627600	0.234502		I	10238200	0.781872		I	11630500	0.213055		I	10426600	0.382918		I	10483600	0.642356		I	10128400	0.298818
chrI	12661100	0.759205		I	10302900	0.919792		I	11664500	0.781786		I	10483600	0.644782		I	10519800	0.35066		I	10176400	0.339582
chrI	12736700	0.786068		I	10330900	0.531449		I	11693100	0.396045		I	10522700	0.208936		I	10556900	0.614849		I	10235600	0.561226
chrI	12815700	0.847224		I	10371700	0.350029		I	11734200	0.293138		I	10557300	0.605874		I	10585900	0.536846		I	10259500	0.642092
chrI	12917900	0.761597		I	10402900	0.546545		I	11795400	0.620484		I	10585100	0.31503		I	10604600	0.536846		I	10327200	0.400794
chrI	12965700	0.569168		I	10483700	0.738207		I	11814300	0.907847		I	10606200	0.480326		I	10644500	0.366274		I	10371600	0.702113
chrI	12990100	0.607169		I	10518500	0.4084		I	11877100	0.447321		I	10644900	0.506104		I	10669900	0.337446		I	10442100	0.450788
chrI	13035100	0.542335		I	10557500	0.725006		I	11910600	0.568766		I	10725900	0.392188		I	10686800	0.574145		I	10483500	0.486014
chrI	13060700	0.462736		I	10585800	0.615218		I	11934800	0.426796		I	10749900	0.242544		I	10717800	0.75334		I	10522300	0.229653
chrI	13096300	0.256163		I	10606100	0.608082		I	11987400	0.514227		I	10822700	0.581133		I	10771900	0.360415		I	10557000	0.352902
chrI	13158900	0.722354		I	10644400	0.517517		I	12042900	0.680233		I	10844600	0.570498		I	10792500	0.653786		I	10580100	0.377675
chrI	13241100	0.559816		I	10686700	0.590382		I	12067600	0.57237		I	10870000	0.22632		I	10822900	0.375146		I	10606200	0.402834
chrI	13264900	0.794196		I	10721400	0.563823		I	12087400	0.401284		I	10898000	0.465485		I	10847500	0.546966		I	10645000	0.391802
chrI	13335700	0.768169		I	10749700	0.360789		I	12107500	0.376946		I	10929000	0.390064		I	10897900	0.420385		I	10670500	0.190479
chrI	13373700	0.636922		I	10775100	0.275532		I	12143900	0.346543		I	10969100	0.363722		I	10929500	0.580189		I	10695700	0.151743
chrI	13411600	0.477657		I	10819300	0.666338		I	12195400	0.339996		I	10994500	0.153583		I	10969100	0.669316		I	10726500	0.476018
chrI	13425600	0.707597		I	10845000	0.538047		I	12229200	0.592187		I	11012500	0.282942		I	11012200	0.255648		I	10770900	0.361465
chrI	13501400	0.781448		I	10877600	0.225736		I	12283800	0.346013		I	11055200	0.376335		I	11050400	0.580405		I	10822800	0.409323
chrI	13534200	0.515049		I	10897400	0.585193		I	12332900	0.462689		I	11105100	0.905841		I	11105300	0.743658		I	10847100	0.51554
chrI	13569900	0.224642		I	10935900	0.599291		I	12377700	0.113444		I	11141900	0.355279		I	11141000	0.340504		I	10900600	0.423943
chrI	13590000	0.533318		I	10969100	0.80142		I	12429300	0.746088		I	11167100	0.762392		I	11167000	0.632558		I	10929100	0.387186
chrI	13629300	0.719054		I	11012500	0.252956		I	12482600	0.916541		I	11197400	0.805832		I	11202900	0.676717		I	11010400	0.331047
chrI	13659800	0.622204		I	11051700	0.594924		I	12504400	0.467444		I	11234800	0.246155		I	11234700	0.357559		I	11050700	0.356614
chrI	13686100	0.311711		I	11075900	0.20358		I	12532300	0.238427		I	11292700	0.552139		I	11292600	0.589686		I	11105100	0.623465
chrI	13747000	0.47018		I	11105200	0.657877		I	12554800	0.540538		I	11313600	0.284797		I	11314000	0.294679		I	11124000	0.756094
chrI	13815600	0.422912		I	11141400	0.461415		I	12597800	0.831093		I	11355400	0.801464		I	11355600	0.693536		I	11140300	0.388189
chrI	13844500	0.754573		I	11166800	0.674895		I	12647000	0.640568		I	11400800	0.696064		I	11400800	0.267193		I	11167000	0.731755
chrI	13949400	0.366174		I	11197500	0.774138		I	12677000	0.508852		I	11447100	0.63806		I	11419200	0.590316		I	11197800	0.834642
chrI	13973000	0.386749		I	11234600	0.3082		I	12731700	0.506418		I	11480200	0.270476		I	11447200	0.727583		I	11234600	0.443915
chrI	13993500	0.692915		I	11262100	0.314927		I	12751100	0.791702		I	11512400	0.565208		I	11480300	0.26616		I	11292300	0.561469
chrI	14086800	0.867725		I	11291200	0.652876		I	12786800	0.449096		I	11565000	0.595151		I	11510400	0.721843		I	11313900	0.463737
chrI	14144300	0.663357		I	11313900	0.134873		I	12813700	0.68435		I	11591600	0.663627		I	11565000	0.653919		I	11363000	0.713563
chrI	14228900	0.747788		I	11355100	0.762776		I	12851500	0.27596		I	11630700	0.390538		I	11591700	0.691444		I	11400500	0.572416
chrI	14306300	0.691207		I	11401000	0.532608		I	12910000	0.790412		I	11663800	0.783422		I	11628500	0.151365		I	11447600	0.719273
chrI	14373100	0.183815		I	11419500	0.615033		I	12971700	0.702282		I	11692400	0.202523		I	11648800	0.450778		I	11480400	0.257934
chrI	14398000	0.448193		I	11447600	0.866667		I	13031200	0.494645		I	11713700	0.187673		I	11667000	0.387002		I	11510900	0.809341
chrI	14425200	0.388759		I	11480400	0.220848		I	13061600	0.355281		I	11764400	0.153077		I	11692600	0.330142		I	11565000	0.843032
chrI	14469800	0.643752		I	11512700	0.63755		I	13099700	0.356707		I	11795600	0.943032		I	11734200	0.546377		I	11591500	0.639075
chrI	14523600	0.736777		I	11565000	0.577654		I	13151800	0.477817		I	11814200	0.934808		I	11761400	0.491473		I	11648500	0.414381
chrI	14611800	0.677394		I	11648300	0.811514		I	13173600	0.78454		I	11853000	0.451581		I	11796900	0.836379		I	11667500	0.763346
chrI	14647700	0.487554		I	11666400	0.811514		I	13241100	0.417789		I	11877500	0.37925		I	11875800	0.30515		I	11734100	0.526542
chrI	14711000	0.287538		I	11692400	0.484895		I	13264200	0.856115		I	11910900	0.558312		I	11895600	0.542002		I	11761600	0.490399
chrI	14734300	0.313606		I	11732500	0.500369		I	13331400	0.755637		I	11936800	0.424346		I	11912300	0.256651		I	11797400	0.805998
chrI	14757100	0.549624		I	11761600	0.238554		I	13358600	0.260715		I	11971400	0.631272		I	11932600	0.420577		I	11933400	0.192071
chrI	14809700	0.417969		I	11796600	0.892343		I	13379900	0.524117		I	11988000	0.631272		I	11988000	0.511656		I	11987000	0.581724
chrI	14839300	0.132423		I	11852700	0.481208		I	13404500	0.582936		I	12036900	0.634724		I	12006600	0.647681		I	12006800	0.678494
chrI	14867000	0.321825		I	11877800	0.328415		I	13448200	0.207713		I	12069400	0.448237		I	12036800	0.618855		I	12042900	0.445295
chrI	14900000	0.221437		I	11911500	0.386093		I	13501300	0.69886		I	12086400	0.34377		I	12067500	0.431312		I	12062500	0.652713
chrI	14957800	0.876777		I	11934300	0.55194		I	13538200	0.597925		I	12107400	0.411726		I	12086600	0.348405		I	12084800	0.23573
chrI	15035300	0.856796		I	11951500	0.416221		I	13566500	0.400835		I	12143200	0.391995		I	12108500	0.221917		I	12107900	0.223537
chrII	22800	0.526709		I	11971100	0.61513		I	13632900	0.567486		I	12195500	0.552204		I	12143200	0.260416		I	12133400	0.490419
chrII	44000	0.225047		I	11991500	0.331953		I	13659700	0.445586		I	12229600	0.70722		I	12175700	0.280782		I	12158900	0.634651
chrII	68900	0.522207		I	12011800	0.608327		I	13687200	0.427669		I	12283700	0.539039		I	12195300	0.444185		I	12175400	0.335096
chrII	95200	0.321957		I	12036900	0.895361		I	13741800	0.655512		I	12333100	0.483323		I	12229700	0.60371		I	12195100	0.423613
chrII	222100	0.545154		I	12069800	0.485645		I	13815100	0.666199		I	12377900	0.158039		I	12284300	0.228044		I	12229100	0.589299
chrII	259400	0.270757		I	12085200	0.586262		I	13846400	0.740023		I	12482700	0.793596		I	12332700	0.359266		I	12283200	0.365885
chrII	313500	0.692543		I	12107400	0.355622		I	13894400	0.419053		I	12504500	0.310059		I	12377600	0.195384		I	12331400	0.337102
chrII	350400	0.197645		I	12142900	0.404853		I	13945000	0.585372		I	12537500	0.636825		I	12406400	0.145823		I	12353300	0.30975
chrII	384100	0.172284		I	12176000	0.47084		I	13973000	0.675117		I	12600700	0.830809		I	12430800	0.505418		I	12378000	0.388895
chrII	430700	0.564717		I	12195800	0.598836		I	13993000	0.913593		I	12646900	0.564196		I	12482600	0.662824		I	12427100	0.567029
chrII	455800	0.612012		I	12229600	0.679229		I	14090800	0.87769		I	12677200	0.63107		I	12503600	0.332397		I	12482700	0.682692
chrII	480800	0.399307		I	12286800	0.746786		I	14145000	0.854061		I	12729800	0.420834		I	12537100	0.637323		I	12555200	0.242681
chrII	535000	0.810543		I	12335000	0.613001		I	14230300	0.737139		I	12751200	0.751817		I	12554800	0.428599		I	12574500	0.196632
chrII	583500	0.258056		I	12372900	0.22025		I	14308200	0.665879		I	12787000	0.599367		I	12598000	0.706379		I	12597900	0.747047
chrII	604400	0.516044		I	12410100	0.346292		I	14345200	0.243806		I	12851600	0.349604		I	12625700	0.142353		I	12625800	0.147782
chrII	629500	0.549081		I	12432800	0.71372		I	14375500	0.193191		I	12909400	0.717051		I	12644700	0.409037		I	12644700	0.575268
chrII	715600	0.195541		I	12479000	0.862593		I	14398200	0.671923		I	12982800	0.51698		I	12678600	0.508406		I	12678800	0.621406
chrII	742500	0.265669		I	12507500	0.281125		I	14434300	0.645085		I	13002600	0.54154		I	12730100	0.621465		I	12730300	0.407206
chrII	870100	0.913506		I	12536900	0.428739		I	14476800	0.685518		I	13039700	0.270861		I	12751100	0.70683		I	12751000	0.664133
chrII	914300	0.458245		I	12601000	0.879394		I	14525400	0.717317		I	13062800	0.401321		I	12786600	0.485731		I	12786900	0.573437
chrII	933600	0.522937		I	12646900	0.59026		I	14553100	0.572505		I	13099600	0.420358		I	12813200	0.600328		I	12824100	0.597897
chrII	957500	0.677674		I	12677100	0.585817		I	14587400	0.335989		I	13151700	0.42133		I	12858700	0.295407		I	12858700	0.309558
chrII	991800	0.57622		I	12735100	0.83287		I	14615100	0.323756		I	13173300	0.496684		I	12903200	0.738865		I	12880400	0.642929
chrII	1051400	0.650555		I	12786700	0.70489		I	14646800	0.399808		I	13223600	0.531633		I	12918800	0.738865		I	12981300	0.520334
chrII	1135100	0.403941		I	12813400	0.622268		I	14708400	0.290703		I	13264200	0.826519		I	12965300	0.688182		I	13008700	0.387475
chrII	1156300	0.582156		I	12851500	0.384959		I	14730000	0.706882		I	13331800	0.75308		I	13008200	0.423199		I	13033100	0.485763
chrII	1210900	0.338557		I	12909400	0.794036		I	14768000	0.636011		I	13358500	0.371993		I	13034800	0.345009		I	13097500	0.418926
chrII	1245100	0.594497		I	12965100	0.558008		I	14810100	0.516621		I	13375800	0.658706		I	13067600	0.432102		I	13153000	0.430645
chrII	1296100	0.353367		I	13002700	0.415993		I	14846600	0.375678		I	13405900	0.39927		I	13152300	0.488867		I	13176200	0.492567
chrII	1320400	0.738907		I	13067600	0.423943		I	14873700	0.464893		I	13501400	0.667672		I	13173400	0.647013		I	13224000	0.384205
chrII	1400900	0.212084		I	13100000	0.386069		I	14905600	0.727789		I	13530700	0.641136		I	13223800	0.419628		I	13249800	0.449696
chrII	1419900	0.301243		I	13127400	0.138549		I	14959100	0.796064		I	13546000	0.564863		I	13241200	0.771225		I	13274600	0.63712
chrII	1445200	0.516498		I	13152100	0.529647		I	15014200	0.399876		I	13566500	0.557258		I	13289500	0.261983		I	13308100	0.23128
chrII	1503100	0.595861		I	13173500	0.797105		I	15035900	0.773484		I	13633800	0.560069		I	13308100	0.132237		I	13330700	0.625177
chrII	1538000	0.618456		I	13199500	0.254136		II	4300	0.48854		I	13663100	0.368325		I	13333200	0.353958		I	13358400	0.354055
chrII	1657500	0.895326		I	13240200	0.878959		II	29700	0.561946		I	13687300	0.55679		I	13358500	0.293143		I	13380200	0.450613
chrII	1684200	0.568785		I	13258100	0.863875		II	65000	0.568414		I	13723700	0.523232		I	13380100	0.333024		I	13403700	0.512199
chrII	1721000	0.270644		I	13289300	0.361464		II	99400	0.536421		I	13741700	0.612569		I	13404200	0.454929		I	13425300	0.456581
chrII	1754700	0.776187		I	13331000	0.742378		II	146200	0.494867		I	13768900	0.242468		I	13456400	0.150076		I	13456400	0.211473
chrII	1789500	0.701243		I	13358600	0.599944		II	176600	0.348016		I	13815600	0.666182		I	13501400	0.613362		I	13507000	0.678492
chrII	1819900	0.35309		I	13380100	0.283979		II	224000	0.636808		I	13845500	0.707931		I	13530100	0.647407		I	13538300	0.632917
chrII	1862400	0.473582		I	13404600	0.406838		II	277900	0.27821		I	13887400	0.585129		I	13570300	0.382167		I	13566400	0.378853
chrII	1926200	0.578512		I	13485300	0.442134		II	317500	0.718633		I	13944200	0.760115		I	13600600	0.34914		I	13599900	0.450278
chrII	1985800	0.742473		I	13504300	0.671409		II	370000	0.686326		I	13975000	0.950144		I	13633900	0.561536		I	13633900	0.351848
chrII	2061000	0.823643		I	13538200	0.735208		II	432700	0.592102		I	13992500	0.950144		I	13659800	0.292393		I	13658100	0.316414
chrII	2093000	0.784583		I	13566700	0.571553		II	455600	0.585386		I	14010900	0.542443		I	13687200	0.490589		I	13686800	0.490533
chrII	2137900	0.926267		I	13599800	0.385449		II	513900	0.590981		I	14091100	0.877768		I	13743800	0.38961		I	13744500	0.378002
chrII	2199100	0.147329		I	13633200	0.61722		II	532600	0.803804		I	14145100	0.877612		I	13768500	0.204585		I	13809600	0.3955
chrII	2227000	0.56247		I	13663500	0.269334		II	603800	0.677512		I	14167900	0.711409		I	13815800	0.381931		I	13847100	0.719675
chrII	2296000	0.500714		I	13687200	0.671268		II	629500	0.678374		I	14188600	0.428333		I	13845600	0.588486		I	13884100	0.510794
chrII	2352100	0.632732		I	13718500	0.426769		II	673900	0.614777		I	14314900	0.634494		I	13868400	0.25353		I	13973700	0.577267
chrII	2433100	0.712445		I	13741600	0.618769		II	715600	0.495668		I	14344900	0.247912		I	13894200	0.471496		I	13997200	0.500744
chrII	2452200	0.907988		I	13768200	0.275459		II	733600	0.653335		I	14375100	0.215211		I	13945200	0.697125		I	14050000	0.189693
chrII	2488000	0.599688		I	13815200	0.71361		II	767700	0.393618		I	14398300	0.625044		I	13973900	0.505871		I	14071200	0.562748
chrII	2563200	0.0813854		I	13846500	0.703412		II	867600	0.941558		I	14434400	0.562574		I	13993000	0.664058		I	14090800	0.765047
chrII	2587700	0.47597		I	13887000	0.583859		II	918300	0.813047		I	14459200	0.689655		I	14029000	0.257057		I	14145200	0.791837
chrII	2640100	0.320356		I	13944900	0.836345		II	933600	0.791222		I	14476900	0.689655		I	14071400	0.480361		I	14173600	0.221326
chrII	2661400	0.691634		I	13973000	0.61151		II	958300	0.593975		I	14508500	0.775588		I	14090500	0.611211		I	14279500	0.162025
chrII	2769400	0.848124		I	13993000	0.892015		II	990800	0.605659		I	14525200	0.739749		I	14144700	0.71246		I	14314800	0.707606
chrII	2810900	0.380405		I	14011000	0.189285		II	1131900	0.491977		I	14553100	0.645037		I	14168400	0.319008		I	14372800	0.673282
chrII	2833500	0.587811		I	14029100	0.344043		II	1151700	0.574812		I	14587000	0.422744		I	14187800	0.503026		I	14398100	0.674079
chrII	2882400	0.285273		I	14090900	0.843579		II	1182600	0.198847		I	14615300	0.692943		I	14224000	0.680392		I	14425100	0.48735
chrII	2926800	0.348953		I	14148400	0.74432		II	1208700	0.419385		I	14632300	0.50023		I	14297800	0.492766		I	14460500	0.60459
chrII	2964700	0.0629688		I	14167900	0.501854		II	1247200	0.671884		I	14651800	0.537114		I	14372800	0.431212		I	14508500	0.745102
chrII	2995100	0.678289		I	14187700	0.447509		II	1297000	0.492708		I	14694400	0.170808		I	14398200	0.667234		I	14525500	0.745102
chrII	3055600	0.47928		I	14230300	0.750215		II	1319200	0.565921		I	14726100	0.730677		I	14424400	0.395449		I	14553100	0.52202
chrII	3083500	0.446871		I	14315100	0.627335		II	1363000	0.370013		I	14771300	0.644301		I	14466100	0.637262		I	14587200	0.32711
chrII	3119400	0.405578		I	14352800	0.291486		II	1400500	0.674497		I	14809800	0.576033		I	14508400	0.569142		I	14611900	0.276003
chrII	3184400	0.283078		I	14372500	0.420684		II	1424500	0.639498		I	14846600	0.4006		I	14525400	0.628068		I	14650800	0.481938
chrII	3310200	0.820111		I	14398100	0.651455		II	1446100	0.685403		I	14880700	0.443712		I	14553200	0.451781		I	14680800	0.178383
chrII	3374800	0.678642		I	14434100	0.653982		II	1486300	0.631629		I	14905600	0.806862		I	14594500	0.7167		I	14726500	0.473239
chrII	3485100	0.581558		I	14476800	0.772533		II	1532200	0.401171		I	14960800	0.754454		I	14611900	0.645768		I	14754200	0.625171
chrII	3522400	0.518027		I	14524200	0.739567		II	1622700	0.207957		I	15013900	0.259755		I	14646900	0.537784		I	14771300	0.625171
chrII	3549400	0.55158		I	14553100	0.6434		II	1659200	0.904372		I	15041600	0.669812		I	14729900	0.602431		I	14801000	0.399977
chrII	3594400	0.408498		I	14587600	0.416595		II	1687200	0.466633		II	4800	0.835086		I	14755100	0.528948		I	14827000	0.31043
chrII	3653300	0.374609		I	14615200	0.314005		II	1717500	0.210839		II	38200	0.333113		I	14817800	0.312082		I	14853100	0.362794
chrII	3679100	0.61062		I	14646800	0.522971		II	1755000	0.801408		II	60700	0.619409		I	14847500	0.44835		I	14880600	0.451032
chrII	3744100	0.599926		I	14697800	0.33332		II	1788800	0.743477		II	94400	0.186946		I	14880700	0.485814		I	14908400	0.643225
chrII	3783500	0.550963		I	14730200	0.712455		II	1817200	0.531238		II	146200	0.687273		I	14908700	0.504638		I	14958300	0.77571
chrII	3812000	0.494385		I	14771000	0.691653		II	1856600	0.471665		II	176900	0.242947		I	14962400	0.691996		I	14987200	0.419578
chrII	3895000	0.449573		I	14818900	0.450739		II	1923400	0.671253		II	227300	0.564879		I	14989900	0.256808		I	15030400	0.459053
chrII	3956700	0.787624		I	14846400	0.517227		II	1986300	0.967758		II	277100	0.565247		I	15014800	0.311726		I	15052700	0.579628
chrII	4006700	0.268414		I	14873700	0.639767		II	2050400	0.785107		II	317400	0.692916		I	15036500	0.754347		II	29700	0.70101
chrII	4045900	0.476889		I	14905600	0.746685		II	2093600	0.720018		II	370300	0.295394		II	65300	0.587008		II	65400	0.639285
chrII	4097700	0.757437		I	14960700	0.707744		II	2138000	0.965374		II	432400	0.575144		II	96500	0.649802		II	106800	0.550248
chrII	4129700	0.310902		I	15014400	0.302008		II	2199500	0.515325		II	455800	0.658863		II	147300	0.39346		II	141600	0.464892
chrII	4152200	0.478797		II	29700	0.725668		II	2221600	0.690722		II	514200	0.559724		II	173400	0.209113		II	174000	0.439013
chrII	4213400	0.38671		II	64800	0.631329		II	2256900	0.528433		II	532400	0.718768		II	224300	0.512487		II	226100	0.645311
chrII	4231200	0.372429		II	99200	0.668088		II	2295300	0.525096		II	577900	0.133491		II	259600	0.189675		II	273400	0.740972
chrII	4288000	0.254019		II	146000	0.701969		II	2358400	0.633263		II	604000	0.420963		II	278700	0.305194		II	316600	0.681544
chrII	4315400	0.645324		II	173800	0.466374		II	2399500	0.144498		II	629300	0.651719		II	317300	0.394954		II	350800	0.161571
chrII	4376700	0.651433		II	224600	0.474892		II	2431200	0.739801		II	673800	0.611943		II	370200	0.6681		II	433100	0.4705
chrII	4418100	0.434526		II	318900	0.460401		II	2451200	0.849093		II	715600	0.733919		II	432500	0.428566		II	460000	0.538247
chrII	4462600	0.496292		II	370300	0.726261		II	2485400	0.476655		II	733500	0.733919		II	456100	0.593708		II	571900	0.0959984
chrII	4508300	0.252834		II	432600	0.506513		II	2506500	0.561275		II	767600	0.647936		II	485200	0.219927		II	604400	0.438826
chrII	4574500	0.795763		II	455500	0.641632		II	2556900	0.60077		II	808000	0.171733		II	513000	0.388077		II	629700	0.448168
chrII	4602800	0.376047		II	485000	0.416775		II	2588100	0.767329		II	867300	0.913452		II	534600	0.574097		II	674400	0.524963
chrII	4673500	0.663735		II	513400	0.568763		II	2609400	0.113274		II	933200	0.817106		II	577500	0.17862		II	717300	0.296845
chrII	4699400	0.665645		II	534400	0.636759		II	2665400	0.560344		II	957700	0.576112		II	603800	0.394798		II	776900	0.323933
chrII	4742300	0.309067		II	572100	0.203915		II	2707500	0.34519		II	983300	0.638055		II	629900	0.472313		II	802000	0.262896
chrII	4823400	0.774651		II	604200	0.527637		II	2742400	0.221359		II	1045700	0.63543		II	674700	0.636897		II	860800	0.425058
chrII	4851800	0.292709		II	629200	0.736803		II	2769800	0.836502		II	1088100	0.275201		II	715400	0.660229		II	897000	0.296765
chrII	4909200	0.376606		II	674600	0.731548		II	2813500	0.437911		II	1121100	0.405286		II	801600	0.297275		II	918200	0.729339
chrII	4949100	0.43242		II	712800	0.427231		II	2840300	0.538352		II	1151600	0.57771		II	860200	0.83144		II	933100	0.387654
chrII	4984600	0.750714		II	767300	0.684211		II	2881500	0.295157		II	1182500	0.135449		II	897000	0.225845		II	957800	0.412013
chrII	5021000	0.420412		II	801800	0.32188		II	2906400	0.45284		II	1202200	0.523039		II	914900	0.683298		II	984600	0.653717
chrII	5049800	0.717786		II	867400	0.899946		II	2961100	0.340961		II	1247300	0.749045		II	933200	0.309175		II	1037300	0.586386
chrII	5082300	0.396072		II	896900	0.183795		II	2994800	0.667144		II	1297200	0.515782		II	957900	0.441315		II	1088900	0.447854
chrII	5182000	0.91213		II	916900	0.639292		II	3055100	0.674753		II	1319500	0.505452		II	1051600	0.435093		II	1121000	0.360079
chrII	5227700	0.699536		II	934200	0.740068		II	3116300	0.443462		II	1341600	0.606951		II	1088800	0.38384		II	1156500	0.220413
chrII	5340500	0.872886		II	982900	0.690198		II	3177900	0.631046		II	1363000	0.397154		II	1133700	0.6787		II	1202300	0.327396
chrII	5380600	0.139923		II	1088100	0.339614		II	3203600	0.614139		II	1400400	0.678883		II	1156100	0.291007		II	1247700	0.629643
chrII	5423000	0.643951		II	1132100	0.485391		II	3304700	0.758599		II	1425700	0.792753		II	1202300	0.30796		II	1290200	0.383001
chrII	5462400	0.701342		II	1151100	0.592888		II	3349200	0.224893		II	1452500	0.678769		II	1235800	0.669138		II	1320100	0.584839
chrII	5501400	0.220583		II	1182500	0.246391		II	3371100	0.59077		II	1486300	0.502907		II	1290400	0.332038		II	1363500	0.46983
chrII	5528900	0.127527		II	1202400	0.504108		II	3456500	0.235905		II	1507000	0.276747		II	1319200	0.48786		II	1400600	0.311533
chrII	5593300	0.640632		II	1228800	0.346875		II	3489800	0.793017		II	1532100	0.738102		II	1343000	0.489804		II	1426800	0.588122
chrII	5664600	0.550561		II	1247400	0.611473		II	3523100	0.840182		II	1623400	0.129686		II	1363300	0.227563		II	1445900	0.776638
chrII	5715300	0.428787		II	1296900	0.634064		II	3558600	0.354756		II	1659500	0.863036		II	1400700	0.665293		II	1486300	0.644604
chrII	5736400	0.624943		II	1318000	0.646231		II	3585900	0.381998		II	1686300	0.186488		II	1418300	0.545756		II	1528400	0.259886
chrII	5783500	0.378771		II	1362900	0.265601		II	3611100	0.536179		II	1754900	0.752179		II	1451300	0.646707		II	1554400	0.568456
chrII	5840100	0.316926		II	1385600	0.707773		II	3647400	0.410868		II	1786400	0.693834		II	1486300	0.421473		II	1590100	0.285807
chrII	5878900	0.408995		II	1400700	0.707773		II	3680100	0.586903		II	1817500	0.50767		II	1503300	0.678435		II	1656800	0.837669
chrII	5933000	0.713747		II	1424200	0.787066		II	3705200	0.223211		II	1858700	0.398492		II	1528600	0.151141		II	1686800	0.242001
chrII	6048700	0.180386		II	1449900	0.72		II	3743300	0.294352		II	1890800	0.409094		II	1548900	0.629745		II	1728400	0.129882
chrII	6114800	0.701929		II	1486300	0.674466		II	3782900	0.635953		II	1923200	0.60442		II	1659300	0.75958		II	1754400	0.681526
chrII	6188500	0.65892		II	1548500	0.657136		II	3816100	0.608666		II	1959500	0.0499942		II	1683800	0.191079		II	1789500	0.690957
chrII	6247600	0.306073		II	1571000	0.489396		II	3894200	0.50819		II	1986600	0.746467		II	1717300	0.30874		II	1820100	0.351265
chrII	6269500	0.41709		II	1622900	0.343349		II	3915800	0.484996		II	2050200	0.704124		II	1755000	0.651509		II	1861900	0.53536
chrII	6333400	0.51813		II	1656600	0.802039		II	3934600	0.483351		II	2093400	0.653915		II	1789500	0.752489		II	1891700	0.489361
chrII	6352300	0.76986		II	1687700	0.209365		II	3954000	0.723916		II	2137500	0.952413		II	1819800	0.437933		II	1920600	0.358847
chrII	6415700	0.74084		II	1717500	0.225973		II	4004800	0.32275		II	2201400	0.682162		II	1864100	0.519657		II	1960800	-0.147737
chrII	6444900	0.272641		II	1755900	0.798781		II	4044700	0.574632		II	2221500	0.753945		II	1892900	0.388262		II	1986200	0.891014
chrII	6491400	0.82823		II	1788800	0.803658		II	4065000	0.670673		II	2256200	0.723262		II	1923100	0.576832		II	2012700	0.383405
chrII	6521700	0.665881		II	1817700	0.693631		II	4095300	0.69404		II	2295400	0.32623		II	1986500	0.654589		II	2052700	0.395281
chrII	6563100	0.452712		II	1859400	0.490391		II	4132500	0.415123		II	2353700	0.61567		II	2012100	0.184394		II	2092700	0.66562
chrII	6592600	0.467138		II	1893000	0.276791		II	4152400	0.613675		II	2430900	0.741394		II	2046100	0.279271		II	2137500	0.931429
chrII	6680500	0.57288		II	1923500	0.736859		II	4181500	0.39316		II	2451100	0.771169		II	2069600	0.393613		II	2222900	0.621951
chrII	6734400	0.276233		II	1986400	1		II	4205900	0.492773		II	2485600	0.541746		II	2093200	0.576385		II	2256500	0.504157
chrII	6778800	0.527775		II	2011600	0.266052		II	4246300	0.351244		II	2506600	0.589215		II	2137000	0.928458		II	2295600	0.208376
chrII	6833900	0.713137		II	2054000	0.817432		II	4314100	0.791368		II	2556500	0.592573		II	2199300	0.231767		II	2314200	0.411712
chrII	6859000	0.517393		II	2093900	0.561564		II	4372000	0.772505		II	2588100	0.677503		II	2222100	0.645224		II	2333500	0.665899
chrII	6934100	0.872332		II	2137600	0.955985		II	4418800	0.577128		II	2611900	0.190672		II	2256200	0.638003		II	2359100	0.633373
chrII	6975000	0.417666		II	2200600	0.537127		II	4467300	0.62378		II	2633500	0.169207		II	2295600	0.252796		II	2405400	0.218048
chrII	7029900	0.259203		II	2221600	0.684111		II	4508500	0.419764		II	2658700	0.724638		II	2333600	0.162922		II	2431400	0.783177
chrII	7050500	0.596807		II	2256500	0.641988		II	4572300	0.883441		II	2707800	0.463594		II	2359000	0.438477		II	2449000	0.836126
chrII	7084200	0.750892		II	2295700	0.312634		II	4673600	0.685189		II	2742100	0.253652		II	2404200	0.180511		II	2487200	0.617449
chrII	7116500	0.307946		II	2364700	0.574895		II	4700800	0.51161		II	2767000	0.843873		II	2430900	0.769256		II	2506500	0.601186
chrII	7148700	0.251489		II	2404600	0.370889		II	4739100	0.415653		II	2806900	0.380014		II	2451200	0.753223		II	2527200	0.304004
chrII	7201100	0.32529		II	2430800	0.798219		II	4779700	0.213319		II	2840300	0.527971		II	2490400	0.634239		II	2556600	0.494558
chrII	7251600	0.630811		II	2451100	0.761148		II	4823100	0.787883		II	2880400	0.531087		II	2506300	0.634239		II	2587800	0.71404
chrII	7302100	0.784251		II	2485200	0.60884		II	4855200	0.408096		II	2902400	0.588942		II	2556900	0.409012		II	2605900	0.25688
chrII	7382000	0.635275		II	2506000	0.537605		II	4941800	0.778508		II	2964700	0.563601		II	2587800	0.681691		II	2633300	0.347006
chrII	7442400	0.36521		II	2555400	0.679113		II	4983700	0.681355		II	2989300	0.465362		II	2609200	0.304328		II	2662200	0.565266
chrII	7459600	0.274211		II	2588100	0.720583		II	5014700	0.57799		II	3055200	0.657001		II	2633300	0.288908		II	2708400	0.420273
chrII	7478600	0.393807		II	2607000	0.280833		II	5044100	0.443189		II	3094100	0.157419		II	2668200	0.476918		II	2742500	0.230154
chrII	7538300	0.492112		II	2633000	0.165966		II	5082100	0.341217		II	3127200	0.457511		II	2707600	0.361323		II	2774400	0.718534
chrII	7570900	0.5126		II	2707600	0.379954		II	5182900	0.961378		II	3177800	0.768986		II	2742600	0.195834		II	2811300	0.715226
chrII	7599300	0.224108		II	2742100	0.248698		II	5228300	0.710118		II	3203600	0.632595		II	2774500	0.459668		II	2881500	0.333372
chrII	7618100	0.483235		II	2770000	0.726343		II	5288000	0.293299		II	3296400	0.792932		II	2813500	0.359884		II	2904800	0.402689
chrII	7667900	0.714505		II	2807600	0.804716		II	5324900	0.611663		II	3335000	0.219526		II	2838500	0.502408		II	2931100	0.28623
chrII	7702800	0.362028		II	2837800	0.488316		II	5344700	0.85808		II	3371300	0.570029		II	2881500	0.39371		II	2964900	0.593627
chrII	7763100	0.256225		II	2864700	0.567924		II	5371600	0.377918		II	3431100	0.272583		II	2905700	0.391039		II	2998400	0.510437
chrII	7783800	0.76007		II	2880300	0.49885		II	5420300	0.621625		II	3457100	0.236163		II	2930900	0.260311		II	3059900	0.683179
chrII	7813900	0.779828		II	2906400	0.71264		II	5461500	0.670992		II	3489900	0.670102		II	2964400	0.525168		II	3093000	0.440023
chrII	7860800	0.647505		II	2964800	0.778925		II	5498400	0.339296		II	3523200	0.855536		II	2988100	0.605939		II	3127400	0.340821
chrII	7893900	0.252649		II	2990800	0.535104		II	5526000	0.539034		II	3558800	0.236894		II	3059900	0.704812		II	3154700	0.282251
chrII	8028000	0.449636		II	3055200	0.74411		II	5593700	0.864826		II	3591200	0.384215		II	3090200	0.103827		II	3178000	0.448812
chrII	8053100	0.745851		II	3115900	0.506065		II	5638400	0.278405		II	3612100	0.307041		II	3130600	0.397138		II	3203800	0.70441
chrII	8093000	0.505833		II	3177900	0.797391		II	5664700	0.571025		II	3647900	0.39996		II	3155300	0.0410657		II	3297500	0.652159
chrII	8129400	0.691042		II	3203700	0.803317		II	5701400	0.169085		II	3680100	0.537124		II	3177900	0.666001		II	3371400	0.416848
chrII	8222900	0.67648		II	3259500	0.484553		II	5737300	0.553365		II	3705200	0.280793		II	3203600	0.43663		II	3402900	0.119679
chrII	8276200	0.405924		II	3304700	0.69951		II	5782500	0.470982		II	3743100	0.12308		II	3277800	0.33182		II	3456600	0.469854
chrII	8326700	0.854598		II	3328700	0.44422		II	5836900	0.350824		II	3783400	0.57511		II	3349700	0.350568		II	3490100	0.2904
chrII	8412700	0.698153		II	3349000	0.200426		II	5877200	0.613279		II	3816400	0.476128		II	3371200	0.388885		II	3558300	0.494794
chrII	8456800	0.0954101		II	3374100	0.521714		II	5928200	0.658663		II	3894300	0.744874		II	3456800	0.441237		II	3584900	0.291547
chrII	8481700	0.37501		II	3413900	0.170036		II	5988900	0.311192		II	3916000	0.2534		II	3489900	0.484158		II	3610600	0.358042
chrII	8569200	0.779528		II	3437000	0.117574		II	6051700	0.563484		II	3953300	0.443271		II	3557200	0.494202		II	3652100	0.509652
chrII	8602600	0.286824		II	3489800	0.492259		II	6122000	0.698792		II	4002900	0.305241		II	3586000	0.34147		II	3671000	0.462511
chrII	8653200	0.352445		II	3529100	0.826909		II	6173800	0.660631		II	4044600	0.624451		II	3612700	0.152944		II	3708100	0.108156
chrII	8692500	0.460062		II	3556700	0.498638		II	6192000	0.756318		II	4064800	0.596628		II	3647800	0.405801		II	3743200	0.120999
chrII	8764800	0.419174		II	3586200	0.51812		II	6243800	0.443914		II	4094600	0.680352		II	3713300	0.398182		II	3765300	0.580532
chrII	8788000	0.551929		II	3611700	0.607193		II	6266500	0.738591		II	4132400	0.396326		II	3759300	0.594623		II	3783700	0.580532
chrII	8811200	0.657915		II	3647200	0.493337		II	6292300	0.421256		II	4151900	0.627229		II	3784300	0.503457		II	3816700	0.446517
chrII	8846800	0.275181		II	3680100	0.574107		II	6357600	0.833695		II	4181600	0.385076		II	3816400	0.410906		II	3892200	0.37652
chrII	8896700	0.909736		II	3705200	0.207631		II	6420800	0.676471		II	4205800	0.416228		II	3839900	0.155086		II	3916300	0.403776
chrII	8925700	0.429846		II	3743100	0.220284		II	6492500	0.771058		II	4244000	0.312283		II	3894600	0.398411		II	3935900	0.571247
chrII	8966100	0.165501		II	3782800	0.698191		II	6523400	0.817209		II	4314100	0.862544		II	3916500	0.641379		II	3953500	0.301284
chrII	9061400	0.918892		II	3816000	0.662235		II	6562300	0.509013		II	4344100	0.175764		II	3932600	0.216412		II	3972300	0.674851
chrII	9093200	0.30483		II	3839800	0.132746		II	6588600	0.461256		II	4369100	0.569519		II	3953400	0.350338		II	4001100	0.276531
chrII	9177400	0.75889		II	3894200	0.736477		II	6608600	0.567302		II	4402800	0.609398		II	3971900	0.583861		II	4044600	0.426214
chrII	9215300	0.194185		II	3932700	0.554897		II	6682800	0.683643		II	4417000	0.433577		II	4004500	0.177017		II	4064100	0.52554
chrII	9265600	0.860997		II	3952600	0.669674		II	6709400	0.564994		II	4467200	0.489292		II	4045000	0.564539		II	4092100	0.66069
chrII	9309000	0.66346		II	3978600	0.266209		II	6733900	0.505099		II	4491500	0.478879		II	4094100	0.633323		II	4130000	0.288348
chrII	9356000	0.384796		II	4000400	0.384287		II	6777600	0.504562		II	4508600	0.400164		II	4129500	0.310957		II	4152200	0.374607
chrII	9490800	0.870597		II	4044800	0.712707		II	6830400	0.892975		II	4565400	0.843449		II	4152200	0.318461		II	4212300	0.300189
chrII	9573800	0.310661		II	4065400	0.712707		II	6860400	0.340941		II	4580200	0.694453		II	4177300	0.272188		II	4253100	0.268967
chrII	9610500	0.176054		II	4094600	0.751738		II	6909500	0.117234		II	4675100	0.783776		II	4205700	0.335056		II	4288500	0.360005
chrII	9646800	0.779808		II	4132200	0.35664		II	6934700	0.667261		II	4700900	0.515412		II	4252700	0.406921		II	4316200	0.589901
chrII	9717700	0.694093		II	4152300	0.580262		II	6974100	0.424192		II	4779200	0.407445		II	4288600	0.120475		II	4372100	0.766432
chrII	9770800	0.299902		II	4174200	0.267035		II	7029700	0.480567		II	4823200	0.782737		II	4320300	0.475979		II	4405000	0.698385
chrII	9839200	1		II	4205800	0.477816		II	7083900	0.702712		II	4862300	0.143199		II	4372600	0.692891		II	4464100	0.623304
chrII	9894800	0.804212		II	4289300	0.784349		II	7117900	0.25227		II	4887300	0.212655		II	4405100	0.665323		II	4491300	0.264803
chrII	9931600	0.415948		II	4320500	0.798629		II	7159400	0.181871		II	4915400	0.373569		II	4421500	0.471152		II	4508000	0.680736
chrII	9966700	0.61807		II	4373000	0.729957		II	7202900	0.454489		II	4942000	0.461902		II	4464000	0.573376		II	4572000	0.860484
chrII	10035500	0.286271		II	4402800	0.30749		II	7257100	0.417199		II	4958300	0.289997		II	4488900	0.143845		II	4654700	0.268967
chrII	10070700	0.862786		II	4421900	0.625662		II	7301700	0.416558		II	4979400	0.68213		II	4508500	0.418281		II	4676500	0.829683
chrII	10147500	0.424273		II	4464400	0.667206		II	7334000	0.380003		II	5013100	0.607319		II	4570300	0.695297		II	4728900	0.626642
chrII	10172200	0.759975		II	4491400	0.785974		II	7357000	0.389012		II	5048700	0.297647		II	4595300	0.497125		II	4763400	0.593727
chrII	10209200	0.47229		II	4508600	0.529452		II	7381800	0.67763		II	5082000	0.310831		II	4673400	0.466427		II	4779500	0.483264
chrII	10247500	0.393997		II	4570200	0.84855		II	7474700	0.369145		II	5124200	0.326857		II	4700800	0.55825		II	4821600	0.771839
chrII	10297600	0.330092		II	4672300	0.926065		II	7542300	0.347032		II	5182700	0.710874		II	4763700	0.146593		II	4859600	0.220291
chrII	10350900	0.420808		II	4700900	0.605396		II	7567000	0.774973		II	5228300	0.812007		II	4779500	0.250737		II	4880400	0.552073
chrII	10375600	0.648996		II	4739200	0.560459		II	7604100	0.314988		II	5288000	0.356759		II	4823600	0.527272		II	4915400	0.339326
chrII	10414800	0.397407		II	4779200	0.410628		II	7622500	0.594085		II	5324800	0.553139		II	4860000	0.308029		II	4956300	0.29954
chrII	10446300	0.478075		II	4823600	0.839807		II	7666900	0.891645		II	5348600	0.671972		II	4884800	0.138066		II	4983400	0.703632
chrII	10503700	0.877914		II	4862500	0.406047		II	7703600	0.440799		II	5371400	0.482904		II	4905000	0.58805		II	5014800	0.546243
chrII	10549100	0.770088		II	4904900	0.6705		II	7755500	0.178106		II	5416000	0.422941		II	4949400	0.577482		II	5050400	0.27325
chrII	10658500	0.61343		II	4941900	0.804492		II	7782800	0.475962		II	5461500	0.623208		II	4994000	0.378722		II	5090500	0.538641
chrII	10693600	0.237434		II	4959300	0.712905		II	7815500	0.657674		II	5491800	0.484464		II	5014800	0.41955		II	5131000	0.446984
chrII	10784800	0.906932		II	5015500	0.671319		II	7856500	0.430186		II	5530200	0.618587		II	5049900	0.336054		II	5186200	0.881678
chrII	10824200	0.487051		II	5043900	0.346662		II	7879400	0.666375		II	5589800	0.788678		II	5082400	0.575466		II	5222300	0.479343
chrII	10860400	0.377047		II	5081800	0.555204		II	7956800	0.596812		II	5638800	0.443799		II	5123900	0.442111		II	5247300	0.510434
chrII	10879800	0.503617		II	5182700	0.714289		II	8011900	0.600731		II	5664600	0.752185		II	5179100	0.792323		II	5288300	0.251594
chrII	10947100	0.300104		II	5227800	0.769581		II	8030100	0.52614		II	5699800	0.447469		II	5227900	0.490872		II	5321400	0.507036
chrII	10989400	0.863968		II	5288000	0.698128		II	8054700	0.713476		II	5736500	0.492003		II	5288000	0.373671		II	5344400	0.760447
chrII	11042200	0.81252		II	5323400	0.599477		II	8099200	0.283479		II	5778600	0.388445		II	5323300	0.305783		II	5371400	0.419363
chrII	11098000	0.655395		II	5348500	0.626431		II	8127800	0.758704		II	5837000	0.224578		II	5344700	0.670357		II	5400000	0.276277
chrII	11127100	0.36125		II	5371600	0.582029		II	8156800	0.279215		II	5877600	0.602386		II	5371200	0.19727		II	5462400	0.654824
chrII	11180900	0.345386		II	5396800	0.13751		II	8220800	0.720112		II	5910200	0.392016		II	5396800	0.214686		II	5494800	0.386217
chrII	11236600	0.585624		II	5418300	0.337671		II	8271400	0.429726		II	5929200	0.649215		II	5426800	0.382154		II	5529200	0.256779
chrII	11286400	0.651268		II	5462700	0.664299		II	8329800	0.942283		II	5967300	0.161162		II	5462500	0.699039		II	5551800	0.35345
chrII	11347100	0.126942		II	5498100	0.555034		II	8415000	0.64303		II	5988300	0.297127		II	5498200	0.300099		II	5588200	0.771776
chrII	11396100	0.311154		II	5525600	0.572838		II	8433300	0.609007		II	6049400	0.439297		II	5530000	0.128079		II	5629800	0.513825
chrII	11450000	0.373017		II	5546700	0.532388		II	8456100	0.175258		II	6068500	0.822984		II	5551600	0.383653		II	5664800	0.172315
chrII	11536500	0.937035		II	5593600	0.846703		II	8486300	0.282927		II	6121700	0.729049		II	5589200	0.667416		II	5691700	0.449542
chrII	11569400	0.573778		II	5631300	0.678754		II	8511600	0.328112		II	6172600	0.534513		II	5630000	0.315358		II	5734400	0.349348
chrII	11632600	0.761027		II	5664500	0.301211		II	8565200	0.823948		II	6192200	0.731124		II	5664800	0.244738		II	5785900	0.466068
chrII	11682500	0.523771		II	5699200	0.212086		II	8597800	0.477425		II	6217900	0.166022		II	5715500	0.232453		II	5879500	0.273013
chrII	11725000	0.185333		II	5715400	0.31467		II	8620600	0.5393		II	6243700	0.759138		II	5736200	0.428159		II	5901700	0.415292
chrII	11750200	0.52274		II	5736400	0.592387		II	8650200	0.506037		II	6292300	0.525169		II	5783600	0.360244		II	5928600	0.662362
chrII	11792300	0.435354		II	5778900	0.35038		II	8686900	0.380794		II	6357500	0.790361		II	5836900	0.226133		II	6005200	0.254304
chrII	11883900	0.876175		II	5837000	0.532725		II	8710300	0.429182		II	6396900	0.355326		II	5878800	0.436453		II	6024700	0.292673
chrII	11917500	0.264147		II	5876500	0.700288		II	8740400	0.250139		II	6421700	0.711199		II	5925200	0.348344		II	6046500	0.415445
chrII	11976600	0.75051		II	5910200	0.428376		II	8763100	0.368228		II	6453100	0.277328		II	5944500	0.566815		II	6069800	0.728763
chrII	12006700	0.310014		II	5932000	0.621743		II	8786600	0.514892		II	6492700	0.691897		II	5982000	0.121549		II	6114400	0.540589
chrII	12037500	0.0849821		II	5967400	0.178688		II	8810800	0.577909		II	6524700	0.768012		II	6046600	0.793438		II	6143300	0.176933
chrII	12090200	0.480626		II	5988300	0.364518		II	8897400	0.892262		II	6562400	0.44486		II	6068800	0.736603		II	6188000	0.600441
chrII	12113600	0.644077		II	6052100	0.891585		II	9060800	0.906499		II	6588600	0.362474		II	6114600	0.671687		II	6216800	0.212386
chrII	12147500	0.35496		II	6068500	0.854967		II	9099400	0.389499		II	6608900	0.506456		II	6170000	0.416995		II	6247700	0.359557
chrII	12189300	0.773845		II	6091600	0.229498		II	9186700	0.535045		II	6689000	0.555376		II	6189100	0.651997		II	6292200	0.448371
chrII	12224200	0.531487		II	6122200	0.604551		II	9220400	0.242371		II	6709500	0.532865		II	6243800	0.419686		II	6334700	0.428665
chrII	12264500	0.404269		II	6172400	0.45178		II	9266700	0.573625		II	6733800	0.707182		II	6269000	0.476302		II	6357900	0.764853
chrII	12290100	0.173253		II	6191900	0.696613		II	9308700	0.760573		II	6777600	0.398933		II	6292400	0.329673		II	6421000	0.635046
chrII	12354300	0.779423		II	6217800	0.132702		II	9357700	0.345554		II	6830400	0.844809		II	6333200	0.402635		II	6453600	0.254031
chrII	12409600	0.198585		II	6243800	0.529756		II	9492300	0.901779		II	6860800	0.268749		II	6361200	0.594065		II	6492000	0.70638
chrII	12460500	0.398223		II	6266500	0.766641		II	9562700	0.404672		II	6934800	0.848889		II	6421500	0.571207		II	6526500	0.745728
chrII	12516400	0.336605		II	6292400	0.441179		II	9610700	0.708915		II	6970300	0.465034		II	6453300	0.228632		II	6559200	0.384448
chrII	12551900	0.147936		II	6327200	0.226432		II	9628000	0.399261		II	7036400	0.787332		II	6491700	0.756406		II	6592800	0.325736
chrII	12578000	0.254115		II	6352000	0.776456		II	9647200	0.519777		II	7083800	0.684282		II	6522700	0.69844		II	6615200	0.399629
chrII	12603500	0.290001		II	6422400	0.717764		II	9665700	0.679383		II	7117700	0.322242		II	6562700	0.356424		II	6642500	0.447891
chrII	12677700	0.879276		II	6453100	0.374615		II	9717300	0.738867		II	7137500	0.482908		II	6592500	0.640308		II	6734000	0.615355
chrII	12756600	0.860221		II	6490600	0.808135		II	9749400	0.215453		II	7203200	0.49479		II	6680900	0.696087		II	6777800	0.419686
chrII	12802500	0.754317		II	6523200	0.806929		II	9771100	0.47805		II	7257200	0.339607		II	6734200	0.625568		II	6829200	0.847933
chrII	12874800	0.518918		II	6560100	0.582613		II	9837800	0.729545		II	7301400	0.207129		II	6777800	0.53959		II	6847700	0.80855
chrII	12914900	0.162233		II	6588600	0.62621		II	9894500	0.81064		II	7337500	0.603271		II	6833100	0.482462		II	6883600	0.424185
chrII	12986100	0.923638		II	6615200	0.385385		II	9931100	0.642952		II	7382200	0.700048		II	6856700	0.590622		II	6934400	0.863054
chrII	13018300	0.39386		II	6683200	0.928612		II	9978600	0.573102		II	7474900	0.340025		II	6883600	0.279127		II	6970300	0.480593
chrII	13037100	0.497427		II	6709600	0.489629		II	10038500	0.409072		II	7527600	0.546948		II	6933900	0.655839		II	7033700	0.695968
chrII	13082400	0.278687		II	6733900	0.762443		II	10076300	0.832661		II	7566900	0.772839		II	6970300	0.571656		II	7084100	0.608963
chrII	13116700	0.175846		II	6776500	0.523905		II	10135000	0.124697		II	7604100	0.274527		II	7030000	0.59505		II	7117000	0.401216
chrII	13165400	0.0925461		II	6830200	0.813552		II	10169100	0.709856		II	7623200	0.623582		II	7083900	0.560561		II	7143500	0.420881
chrII	13196600	0.514289		II	6860800	0.256794		II	10211600	0.419393		II	7664200	0.849437		II	7116700	0.376327		II	7251800	0.498682
chrII	13293400	0.835436		II	6891300	0.211976		II	10239200	0.200049		II	7703600	0.319388		II	7152600	0.192302		II	7296000	0.409921
chrII	13335500	0.827568		II	6934700	0.780744		II	10308900	0.685685		II	7754800	0.416295		II	7203700	0.508609		II	7323100	0.283099
chrII	13369000	0.276788		II	6974400	0.511957		II	10351000	0.766119		II	7815300	0.737219		II	7257500	0.576972		II	7356500	0.170908
chrII	13461400	0.725867		II	7030000	0.817486		II	10378800	0.743886		II	7882900	0.627668		II	7302000	0.636206		II	7383700	0.460081
chrII	13541500	0.307054		II	7083600	0.537445		II	10405600	0.413073		II	7913800	0.278298		II	7337900	0.155259		II	7439000	0.421386
chrII	13589500	0.330159		II	7117700	0.209399		II	10441300	0.633277		II	7956700	0.650595		II	7364000	0.335569		II	7494700	0.282059
chrII	13641000	0.684982		II	7136700	0.288605		II	10498900	0.602814		II	8011900	0.353754		II	7383300	0.624782		II	7526400	0.137379
chrII	13695300	0.222302		II	7159400	0.118085		II	10553100	0.87189		II	8033300	0.502846		II	7439600	0.517635		II	7548600	0.721847
chrII	13737200	0.892144		II	7203600	0.555003		II	10625400	0.273275		II	8055200	0.706911		II	7476300	0.431943		II	7567700	0.700738
chrII	13818900	0.891979		II	7257800	0.51935		II	10659100	0.599797		II	8099200	0.253732		II	7531300	0.613069		II	7592700	0.25349
chrII	13841800	0.733332		II	7301700	0.770145		II	10717300	0.17455		II	8127600	0.719017		II	7567400	0.492578		II	7618100	0.466101
chrII	13858900	0.289931		II	7337500	0.400482		II	10783500	0.9362		II	8193700	0.269735		II	7598500	0.310295		II	7662400	0.633351
chrII	13888300	0.491814		II	7357000	0.349691		II	10849700	0.207657		II	8220000	0.639968		II	7618100	0.589709		II	7677700	0.633351
chrII	13904800	0.491814		II	7382200	0.710672		II	10877500	0.456189		II	8272700	0.419154		II	7662500	0.722031		II	7703100	0.20502
chrII	13969300	0.571054		II	7442700	0.850369		II	10957200	0.753465		II	8330300	0.931462		II	7703400	0.357988		II	7765300	0.321974
chrII	14020100	0.340992		II	7474900	0.36772		II	10988400	0.766233		II	8409600	0.866687		II	7770800	0.756735		II	7792800	0.366395
chrII	14042900	0.789743		II	7534300	0.840937		II	11046500	0.841807		II	8433200	0.452243		II	7788100	0.621644		II	7817500	0.701887
chrII	14063200	0.77725		II	7567100	0.703628		II	11097900	0.704333		II	8455800	0.250998		II	7815000	0.678317		II	7912100	0.430481
chrII	14150800	0.883617		II	7604000	0.360327		II	11125600	0.449826		II	8486400	0.391181		II	7859700	0.29855		II	8008600	0.49879
chrII	14187300	0.864122		II	7667500	0.890878		II	11170000	0.388675		II	8510700	0.407987		II	7883300	0.544485		II	8033400	0.255561
chrII	14248800	0.854051		II	7703800	0.451278		II	11239000	0.637766		II	8564900	0.770349		II	7913900	0.355205		II	8058600	0.574471
chrII	14297000	0.0630224		II	7754800	0.176691		II	11285900	0.81182		II	8597600	0.36788		II	7956700	0.312256		II	8092500	0.693814
chrII	14317100	0.183144		II	7782900	0.345223		II	11345800	0.300079		II	8620400	0.394198		II	8008700	0.476609		II	8128400	0.584246
chrII	14357300	0.713025		II	7815200	0.628554		II	11397900	0.506617		II	8648800	0.265151		II	8033500	0.316449		II	8154000	0.526758
chrII	14405900	0.715356		II	7860100	0.450529		II	11450400	0.567155		II	8686900	0.531725		II	8055200	0.61958		II	8193500	0.271725
chrII	14437900	0.538057		II	7883300	0.611454		II	11535800	0.845042		II	8710300	0.522573		II	8091600	0.522566		II	8229600	0.56062
chrII	14494300	0.484915		II	7933900	0.229377		II	11571000	0.492907		II	8740200	0.379964		II	8127600	0.687609		II	8309500	0.850679
chrII	14568300	0.478919		II	7956700	0.631738		II	11633100	0.745493		II	8763200	0.512113		II	8163500	0.114455		II	8325000	0.246487
chrII	14642800	0.575388		II	8011900	0.544668		II	11680800	0.5455		II	8786300	0.423333		II	8184600	0.292034		II	8345800	0.308613
chrII	14698100	0.770714		II	8054800	0.675022		II	11722600	0.296028		II	8810700	0.548092		II	8222500	0.702275		II	8370700	0.258136
chrII	14724200	0.746865		II	8091300	0.425511		II	11750500	0.572144		II	8894700	0.687838		II	8280200	0.512085		II	8414900	0.413272
chrII	14755300	0.283045		II	8127600	0.859826		II	11785300	0.494552		II	8950400	0.285815		II	8305100	0.402233		II	8434000	0.56211
chrII	14814900	0.877542		II	8163200	0.189599		II	11881300	0.882076		II	8992100	0.115534		II	8324900	0.791569		II	8464300	0.336995
chrII	14888700	0.574662		II	8186900	0.505436		II	11910900	0.332724		II	9060900	0.726996		II	8372800	0.272973		II	8487400	0.1808
chrII	14964300	0.443606		II	8220300	0.750423		II	11953500	0.188713		II	9082800	0.862261		II	8415000	0.29133		II	8510500	0.502964
chrII	15010300	0.641112		II	8273400	0.519901		II	11976700	0.233695		II	9103300	0.389231		II	8433900	0.302725		II	8545900	0.285642
chrII	15053700	0.246402		II	8330000	0.901384		II	12006300	0.639252		II	9123700	0.285498		II	8463600	0.128367		II	8569400	0.652105
chrII	15081500	0.584401		II	8407400	0.633001		II	12028800	0.359048		II	9155000	0.15621		II	8486300	0.176767		II	8602500	0.134865
chrII	15129100	0.60817		II	8433300	0.615763		II	12115300	0.62414		II	9192000	0.31877		II	8510400	0.296694		II	8620600	0.296553
chrII	15231100	0.832966		II	8463600	0.379064		II	12148800	0.677959		II	9221300	0.146249		II	8565200	0.692882		II	8651100	0.235006
chrII	15262800	0.630651		II	8486500	0.403507		II	12186400	0.736613		II	9266500	0.661414		II	8602800	0.631467		II	8691600	0.321546
chrIII	3100	0.433112		II	8511700	0.510239		II	12226000	0.246113		II	9312500	0.719049		II	8620500	0.466471		II	8758500	0.816648
chrIII	20900	0.569719		II	8565100	0.855845		II	12264400	0.517268		II	9357900	0.249947		II	8652700	0.460273		II	8785000	0.479749
chrIII	96400	0.757702		II	8597800	0.611235		II	12301700	0.531266		II	9414800	0.224704		II	8686900	0.291031		II	8811000	0.665333
chrIII	146100	0.222915		II	8620500	0.635764		II	12329700	0.307865		II	9492700	0.869165		II	8710200	0.196792		II	8865200	0.34293
chrIII	177800	0.823949		II	8645600	0.58618		II	12353900	0.577335		II	9522300	0.334268		II	8763000	0.292678		II	8892500	0.821174
chrIII	215900	0.155785		II	8686700	0.48154		II	12420000	0.343583		II	9562800	0.483814		II	8786500	0.344354		II	8943900	0.44107
chrIII	235500	0.406463		II	8710400	0.484744		II	12461000	0.393497		II	9588500	0.441056		II	8810800	0.641113		II	9018100	0.283955
chrIII	301500	0.463282		II	8740900	0.250948		II	12482800	0.658234		II	9606300	0.262737		II	8894500	0.745205		II	9061200	0.755616
chrIII	355000	0.920861		II	8765300	0.460788		II	12525400	0.451573		II	9627700	0.355516		II	8925600	0.472998		II	9099000	0.273282
chrIII	429000	0.784256		II	8786100	0.735588		II	12553700	0.247969		II	9647100	0.684166		II	8942700	0.136635		II	9192200	0.320236
chrIII	486300	0.675231		II	8810900	0.573147		II	12581500	0.632204		II	9722800	0.821817		II	8966600	0.311958		II	9218100	0.411111
chrIII	558800	0.73656		II	8895600	0.805959		II	12612100	0.159237		II	9753600	0.246383		II	8996000	0.175608		II	9260600	0.638976
chrIII	606900	0.110005		II	8966500	0.408123		II	12644600	0.348431		II	9780400	0.412386		II	9018500	0.161087		II	9308800	0.531955
chrIII	635100	0.295036		II	8995600	0.225714		II	12669100	0.853242		II	9825300	0.468946		II	9061200	0.789121		II	9357800	0.205944
chrIII	657300	0.345136		II	9063500	0.77545		II	12702200	0.728679		II	9844600	0.832423		II	9099600	0.302563		II	9382900	0.284169
chrIII	725100	0.359105		II	9099400	0.452541		II	12748400	0.602819		II	9873700	0.379845		II	9123900	0.327976		II	9446600	0.190181
chrIII	791600	0.864232		II	9123800	0.353747		II	12767500	0.868502		II	9894800	0.839252		II	9172700	0.182341		II	9490200	0.629139
chrIII	836200	0.529084		II	9155100	0.117265		II	12801600	0.640917		II	9931000	0.363407		II	9219000	0.470797		II	9581700	0.488717
chrIII	870800	0.511054		II	9175300	0.629354		II	12848700	0.354515		II	9979000	0.537773		II	9266700	0.329078		II	9610500	0.229618
chrIII	906400	0.289107		II	9192100	0.268547		II	12866600	0.350213		II	10040400	0.474732		II	9308800	0.713182		II	9639500	0.54071
chrIII	954900	0.252677		II	9218400	0.214585		II	12914900	0.37996		II	10077100	0.839652		II	9357600	0.351795		II	9656700	0.648423
chrIII	981500	0.485065		II	9266600	0.469533		II	12985700	0.889493		II	10107800	0.211809		II	9383200	0.380814		II	9697900	0.216991
chrIII	1053600	0.349115		II	9308700	0.681825		II	13015600	0.298366		II	10135000	0.264587		II	9413700	0.236736		II	9728800	0.727881
chrIII	1081400	0.580103		II	9358000	0.385376		II	13034900	0.57115		II	10162700	0.329693		II	9490600	0.764563		II	9755200	0.573357
chrIII	1159400	0.533475		II	9383600	0.22086		II	13076600	0.103066		II	10186700	0.457103		II	9526700	0.301113		II	9787700	0.449726
chrIII	1214200	0.541707		II	9413800	0.263516		II	13190200	0.683024		II	10211800	0.397142		II	9561100	0.252475		II	9820800	0.581251
chrIII	1233000	0.665299		II	9492600	0.864156		II	13207100	0.634729		II	10238600	0.445698		II	9588700	0.242554		II	9895100	0.781142
chrIII	1254000	0.322708		II	9526500	0.323179		II	13262300	0.410701		II	10264600	0.575911		II	9611400	0.411764		II	9931200	0.552926
chrIII	1326600	0.201199		II	9561400	0.731522		II	13296400	0.822344		II	10309100	0.667641		II	9665600	0.596333		II	9963400	0.511681
chrIII	1345100	0.435874		II	9592500	0.187634		II	13337500	0.624586		II	10344300	0.86552		II	9716100	0.607853		II	10002200	0.388473
chrIII	1423300	0.616406		II	9627200	0.370429		II	13365100	0.385436		II	10378800	0.727783		II	9754700	0.667085		II	10038800	0.243039
chrIII	1457300	0.742614		II	9647200	0.558303		II	13411100	0.291117		II	10404900	0.457541		II	9788000	0.465387		II	10079400	0.729474
chrIII	1547800	0.167492		II	9717600	0.811305		II	13440300	0.470754		II	10436300	0.445105		II	9820900	0.494212		II	10113000	0.221286
chrIII	1618900	0.708757		II	9749400	0.323097		II	13471000	0.491833		II	10459300	0.637962		II	9870100	0.321719		II	10138200	0.142874
chrIII	1679500	0.307536		II	9788300	0.486827		II	13495900	0.532648		II	10498900	0.613233		II	9894900	0.718912		II	10175100	0.674599
chrIII	1701800	0.457023		II	9825700	0.881892		II	13540600	0.751317		II	10553600	0.778568		II	9931000	0.504639		II	10209000	0.304023
chrIII	1738600	0.154643		II	9894500	0.794066		II	13589300	0.468431		II	10625200	0.357763		II	9963700	0.477595		II	10258400	0.198599
chrIII	1764300	0.668774		II	9932000	0.624778		II	13635600	0.731905		II	10649500	0.227662		II	10002300	0.280414		II	10309000	0.482554
chrIII	1821900	0.379449		II	9978600	0.619707		II	13731100	0.78148		II	10716200	0.211985		II	10041200	0.166433		II	10350800	0.90399
chrIII	1853400	0.526397		II	10038800	0.80807		II	13750100	0.894123		II	10745200	0.136168		II	10079400	0.631639		II	10381400	0.560419
chrIII	1921600	0.878366		II	10076100	0.857623		II	13786900	0.198613		II	10783600	0.905296		II	10107900	0.30925		II	10406500	0.368884
chrIII	1950700	0.374873		II	10107800	0.28149		II	13826500	0.865878		II	10849500	0.266125		II	10133700	0.206749		II	10440300	0.257463
chrIII	1995600	0.122391		II	10135100	0.356907		II	13863300	0.3566		II	10877300	0.46237		II	10169100	0.587485		II	10496900	0.550114
chrIII	2026900	0.345136		II	10169000	0.760411		II	13904700	0.684426		II	10957300	0.619771		II	10205100	0.245086		II	10550700	0.610386
chrIII	2100900	0.247162		II	10210900	0.430038		II	13969600	0.574226		II	10986200	0.650006		II	10308900	0.591337		II	10569700	0.743778
chrIII	2125900	0.585947		II	10249400	0.164126		II	14018400	0.104782		II	11046500	0.816507		II	10350800	0.869576		II	10630000	0.229948
chrIII	2162900	0.880542		II	10266300	0.43861		II	14043700	0.621059		II	11092600	0.66776		II	10381500	0.359128		II	10693400	0.383771
chrIII	2234300	0.789854		II	10309100	0.702971		II	14088800	0.391014		II	11125700	0.393003		II	10405300	0.450248		II	10712500	0.143221
chrIII	2306200	0.267042		II	10344200	0.878913		II	14143300	0.432218		II	11170000	0.245558		II	10441300	0.206525		II	10764900	0.305983
chrIII	2330700	0.614178		II	10379300	0.746267		II	14187400	0.831513		II	11220100	0.807441		II	10461500	0.442303		II	10784000	0.782365
chrIII	2375800	0.217977		II	10406600	0.492817		II	14245000	0.860755		II	11285200	0.81791		II	10496800	0.422755		II	10829400	0.392229
chrIII	2424500	0.497603		II	10441300	0.631996		II	14277800	0.227322		II	11319000	0.129609		II	10550300	0.513174		II	10861100	0.321309
chrIII	2475700	0.619806		II	10455900	0.613906		II	14295100	0.227322		II	11343600	0.253757		II	10568300	0.735105		II	10885500	0.51137
chrIII	2507600	0.175258		II	10502800	0.75998		II	14317100	0.523112		II	11398000	0.436357		II	10602900	0.153243		II	10922000	0.28402
chrIII	2532800	0.550459		II	10549800	0.728953		II	14353900	0.831753		II	11453400	0.68228		II	10657800	0.528778		II	10946200	0.763628
chrIII	2577400	0.473781		II	10608700	0.210731		II	14382700	0.253073		II	11485500	0.223355		II	10693500	0.181707		II	10962800	0.718326
chrIII	2614200	0.410907		II	10652700	0.676955		II	14406400	0.812302		II	11530600	0.743214		II	10718000	0.182932		II	10985700	0.743673
chrIII	2654100	0.286187		II	10716100	0.256401		II	14438800	0.692908		II	11565100	0.490873		II	10784400	0.766619		II	11093000	0.573043
chrIII	2685600	0.132283		II	10745300	0.235398		II	14491900	0.354795		II	11634500	0.595744		II	10829100	0.332241		II	11125200	0.184114
chrIII	2726500	0.326628		II	10783800	0.916588		II	14548800	0.446596		II	11687300	0.648981		II	10869100	0.441651		II	11169900	0.461744
chrIII	2765100	0.283044		II	10840800	0.309615		II	14565100	0.276993		II	11722400	0.426863		II	10922200	0.312339		II	11196800	0.522539
chrIII	2788300	0.615597		II	10869600	0.581301		II	14592000	0.253128		II	11753100	0.586972		II	10948900	0.817564		II	11222500	0.750973
chrIII	2875300	0.10434		II	10922200	0.39838		II	14640100	0.737243		II	11792200	0.505727		II	10988900	0.649906		II	11243000	0.846747
chrIII	2909800	0.642044		II	10957100	0.837201		II	14676700	0.193926		II	11817700	0.154512		II	11046800	0.740756		II	11285800	0.739036
chrIII	2947400	0.368339		II	10987500	0.706386		II	14697500	0.862253		II	11836000	0.24741		II	11098200	0.640886		II	11316600	0.396028
chrIII	2978700	0.628332		II	11046700	0.797138		II	14747100	0.500435		II	11881000	0.863554		II	11126200	0.243619		II	11343500	0.295603
chrIII	3036700	0.33194		II	11097500	0.771201		II	14804200	0.876379		II	11949500	0.455157		II	11169800	0.605345		II	11375200	0.130638
chrIII	3070400	0.613543		II	11126300	0.655056		II	14831400	0.482468		II	11976900	0.24746		II	11196900	0.396488		II	11396100	0.17357
chrIII	3132800	0.194448		II	11169900	0.361988		II	14869100	0.252277		II	11998800	0.561405		II	11238000	0.692844		II	11484000	0.58836
chrIII	3163900	0.335396		II	11238500	0.874652		II	14891300	0.387537		II	12026800	0.493487		II	11291500	0.617052		II	11536400	0.78328
chrIII	3271800	0.599887		II	11288900	0.785565		II	14980500	0.314439		II	12095100	0.445894		II	11316600	0.420809		II	11564800	0.497701
chrIII	3320900	0.627401		II	11318800	0.221826		II	15005400	0.687221		II	12117600	0.596567		II	11343600	0.279745		II	11591000	0.118794
chrIII	3396800	0.806934		II	11346200	0.5328		II	15052800	0.576543		II	12149100	0.661021		II	11396200	0.390593		II	11609600	0.215407
chrIII	3464600	0.603907		II	11396700	0.488191		II	15084700	0.292948		II	12186300	0.735725		II	11446600	0.47467		II	11632300	0.679096
chrIII	3509500	0.35245		II	11453500	0.597393		II	15149600	0.202334		II	12269100	0.434504		II	11486200	0.470113		II	11650000	0.679096
chrIII	3538100	0.562901		II	11487200	0.337058		II	15189900	0.198009		II	12301600	0.625233		II	11536100	0.807547		II	11680500	0.44505
chrIII	3624100	0.878991		II	11535800	0.811134		II	15230900	0.749986		II	12329600	0.263003		II	11569100	0.536931		II	11731800	0.318343
chrIII	3706400	0.493215		II	11568900	0.519119		II	15261700	0.640875		II	12354100	0.390405		II	11599400	0.373883		II	11754200	0.432861
chrIII	3734900	0.413136		II	11634700	0.604221		III	4500	0.454886		II	12382900	0.25948		II	11634400	0.444289		II	11792500	0.481694
chrIII	3800700	0.524549		II	11655200	0.75011		III	36200	0.675555		II	12439600	0.652589		II	11688400	0.394889		II	11820800	0.351619
chrIII	3822700	0.775495		II	11680600	0.707084		III	72200	0.437837		II	12463200	0.434036		II	11722900	0.271407		II	11878400	0.720592
chrIII	3870200	0.847638		II	11722600	0.666724		III	100400	0.548834		II	12483000	0.484118		II	11750000	0.417963		II	11902600	0.579295
chrIII	3916400	0.402855		II	11750500	0.606086		III	145900	0.497898		II	12507100	0.408462		II	11792300	0.524268		II	11954000	0.551944
chrIII	4013100	0.575598		II	11786300	0.498268		III	177700	0.791722		II	12526100	0.59678		II	11821200	0.218375		II	11976200	0.305584
chrIII	4091000	0.801714		II	11825600	0.553084		III	216900	0.616292		II	12552200	0.416359		II	11878700	0.41604		II	11995600	0.412238
chrIII	4195500	0.631556		II	11880900	0.752997		III	263600	0.5028		II	12584200	0.62111		II	11918000	0.445711		II	12027200	0.391306
chrIII	4274400	0.90498		II	11912500	0.322969		III	300000	0.529861		II	12611500	0.282872		II	11953800	0.467301		II	12058900	0.414093
chrIII	4313000	0.12398		II	11953400	0.561541		III	354000	0.855829		II	12645100	0.506679		II	11976400	0.192093		II	12086000	0.636753
chrIII	4362400	0.599466		II	11978500	0.207559		III	401200	0.656444		II	12669100	0.818002		II	11998800	0.489914		II	12115500	0.688067
chrIII	4405000	0.173969		II	12007200	0.721423		III	432200	0.819522		II	12684500	0.836735		II	12027100	0.32145		II	12147100	0.702217
chrIII	4475800	0.701388		II	12028800	0.425998		III	464600	0.526435		II	12702300	0.836735		II	12059100	0.270599		II	12225400	0.508152
chrIII	4514900	0.7847		II	12048800	0.278108		III	480300	0.578382		II	12748400	0.523016		II	12086100	0.243828		II	12248200	0.334574
chrIII	4561300	0.334328		II	12076100	0.153153		III	540100	0.544354		II	12773400	0.745774		II	12115000	0.585135		II	12268700	0.543835
chrIII	4586600	0.459116		II	12115100	0.613446		III	559200	0.651955		II	12801500	0.472762		II	12147700	0.691431		II	12301900	0.488802
chrIII	4666600	0.834645		II	12147200	0.758298		III	580700	0.494459		II	12848400	0.520538		II	12186100	0.580966		II	12329700	0.711687
chrIII	4724300	0.300527		II	12178600	0.77786		III	627100	0.430482		II	12866800	0.433006		II	12225300	0.410622		II	12351000	0.499737
chrIII	4751600	0.751569		II	12226100	0.239616		III	663200	0.364298		II	12906900	0.17918		II	12248500	0.515809		II	12372100	0.335354
chrIII	4786500	0.400414		II	12266700	0.548931		III	689200	0.222616		II	12954700	0.201057		II	12268600	0.489374		II	12431500	0.58056
chrIII	4806200	0.635744		II	12300000	0.573908		III	723900	0.594487		II	12987200	0.709493		II	12302100	0.503904		II	12460700	0.255053
chrIII	4853000	0.254924		II	12327200	0.399587		III	754800	0.581639		II	13035200	0.521842		II	12329800	0.24571		II	12478800	0.424636
chrIII	4878700	0.157632		II	12354100	0.281337		III	770800	0.344103		II	13076000	0.205596		II	12351500	0.524768		II	12509200	0.522204
chrIII	4900800	0.235322		II	12420100	0.216994		III	792500	0.774969		II	13110900	0.458391		II	12390800	0.132268		II	12559200	0.202197
chrIII	4924400	0.354134		II	12462200	0.466704		III	836100	0.7383		II	13179500	0.796445		II	12411500	0.325206		II	12584600	0.619535
chrIII	4948400	0.486516		II	12483000	0.693946		III	868300	0.571868		II	13207400	0.770164		II	12429400	0.575871		II	12611400	0.431205
chrIII	4991200	0.193256		II	12524300	0.669847		III	891200	0.677429		II	13262600	0.915725		II	12461000	0.394005		II	12645100	0.696524
chrIII	5016300	0.68541		II	12551900	0.45437		III	908100	0.330237		II	13296700	0.872865		II	12483700	0.498203		II	12670000	0.532742
chrIII	5078500	0.237601		II	12584200	0.692119		III	952000	0.478081		II	13335300	0.423361		II	12519600	0.61765		II	12692700	0.810476
chrIII	5142600	0.311905		II	12611800	0.101125		III	984200	0.546138		II	13361500	0.627978		II	12552200	0.227316		II	12708300	0.810476
chrIII	5182400	0.436686		II	12645000	0.548174		III	1063800	0.662062		II	13383400	0.610728		II	12584100	0.643819		II	12747900	0.891441
chrIII	5244900	0.403449		II	12684300	0.806722		III	1085100	0.470564		II	13410300	0.319364		II	12611600	0.208867		II	12772900	0.760731
chrIII	5274700	0.369318		II	12702200	0.776085		III	1145000	0.614669		II	13440400	0.920925		II	12644900	0.46935		II	12802800	0.551925
chrIII	5314100	0.354114		II	12748500	0.527359		III	1159600	0.614669		II	13471000	0.549241		II	12669100	0.755062		II	12848700	0.210201
chrIII	5367900	0.247063		II	12767900	0.861562		III	1189100	0.31245		II	13495700	0.564311		II	12684500	0.755062		II	12897700	0.207752
chrIII	5408500	0.521581		II	12802000	0.57997		III	1213900	0.59144		II	13542100	0.832661		II	12748400	0.432213		II	12943900	0.270957
chrIII	5425400	0.377763		II	12848400	0.64117		III	1235400	0.748327		II	13589200	0.437092		II	12767900	0.752063		II	12963500	0.216809
chrIII	5450600	0.653794		II	12866700	0.392976		III	1316500	0.111205		II	13630000	0.377624		II	12802100	0.546852		II	12987600	0.727475
chrIII	5501900	0.68784		II	12915300	0.69071		III	1347700	0.682427		II	13654600	0.635433		II	12848600	0.234503		II	13012200	0.404241
chrIII	5544200	0.679689		II	12947600	0.114644		III	1428700	0.63597		II	13680300	0.232782		II	12874700	0.573709		II	13035200	0.31452
chrIII	5586700	0.226005		II	12986900	0.845079		III	1458300	0.871211		II	13730400	0.729349		II	12946600	0.133715		II	13075800	0.464555
chrIII	5618800	0.596898		II	13015900	0.233933		III	1547300	0.398125		II	13750000	0.910011		II	12963400	0.178825		II	13115400	0.593088
chrIII	5661000	0.532071		II	13035800	0.763503		III	1680200	0.342707		II	13787400	0.655213		II	12987500	0.644015		II	13151600	0.189194
chrIII	5721600	0.747416		II	13075800	0.268145		III	1704900	0.320744		II	13802600	0.804009		II	13014500	0.234065		II	13172800	0.09044
chrIII	5788200	0.355716		II	13112800	0.394296		III	1756600	0.738632		II	13827400	0.821826		II	13035200	0.215193		II	13207800	0.584845
chrIII	5806800	0.704163		II	13154400	0.173246		III	1774300	0.744535		II	13863400	0.382461		II	13076000	0.403795		II	13233900	0.440271
chrIII	5838100	0.440328		II	13179500	0.514161		III	1822900	0.242085		II	13904500	0.781014		II	13111000	0.312954		II	13269200	0.775318
chrIII	5902400	0.457271		II	13207200	0.640256		III	1852700	0.550247		II	13936300	0.287795		II	13265800	0.719302		II	13296600	0.702258
chrIII	5939600	0.401747		II	13268900	0.817754		III	1922500	0.88906		II	13969200	0.625094		II	13296400	0.557757		II	13339200	0.348229
chrIII	5958900	0.695829		II	13296700	0.837224		III	1946000	0.664128		II	14018500	0.216262		II	13335300	0.629992		II	13361600	0.491726
chrIII	5990000	0.164416		II	13335400	0.626092		III	1991000	0.258609		II	14051500	0.847826		II	13365100	0.20626		II	13389600	0.455148
chrIII	6045200	0.340367		II	13365100	0.371923		III	2030600	0.470073		II	14088900	0.452206		II	13383600	0.337796		II	13413900	0.291404
chrIII	6073900	0.419151		II	13383100	0.61866		III	2057300	0.185828		II	14134100	0.820082		II	13413500	0.190681		II	13433200	0.897306
chrIII	6136100	0.579037		II	13410300	0.440113		III	2123000	0.669805		II	14187000	0.866171		II	13440800	0.403999		II	13471000	0.701112
chrIII	6157300	0.391609		II	13441300	0.89845		III	2166200	0.689645		II	14244900	0.836314		II	13471000	0.318767		II	13515800	0.184222
chrIII	6206100	0.466943		II	13471000	0.603727		III	2232500	0.678405		II	14295000	0.22608		II	13496100	0.217412		II	13541300	0.757508
chrIII	6250500	0.246903		II	13495900	0.706868		III	2306400	0.11787		II	14317100	0.55009		II	13540900	0.552989		II	13564600	0.662828
chrIII	6280600	0.846089		II	13542200	0.774673		III	2330700	0.749943		II	14353700	0.792724		II	13589300	0.344628		II	13589300	0.44608
chrIII	6337400	0.311739		II	13589300	0.478683		III	2373600	0.282974		II	14381200	0.072416		II	13632500	0.697253		II	13632600	0.686481
chrIII	6373100	0.633406		II	13680300	0.635495		III	2397400	0.380372		II	14406500	0.778029		II	13679800	0.62513		II	13649400	0.675108
chrIII	6421900	0.560382		II	13697600	0.635495		III	2423700	0.759517		II	14437700	0.659643		II	13695600	0.62513		II	13695600	0.292128
chrIII	6453200	0.351469		II	13723500	0.59737		III	2475500	0.386575		II	14491900	0.500502		II	13723400	0.366687		II	13750700	0.810891
chrIII	6479500	0.416156		II	13749800	0.827223		III	2514200	0.26476		II	14542000	0.407605		II	13751300	0.629835		II	13802700	0.784919
chrIII	6558900	0.681501		II	13786800	0.217693		III	2549400	0.662546		II	14566200	0.483075		II	13787000	0.113406		II	13827500	0.72407
chrIII	6606100	0.706098		II	13827500	0.838516		III	2584400	0.527242		II	14591900	0.349706		II	13827300	0.757839		II	13863900	0.476782
chrIII	6631300	0.43259		II	13863400	0.51866		III	2612400	0.295015		II	14647600	0.752625		II	13863600	0.551837		II	13904800	0.423915
chrIII	6711400	0.624646		II	13904700	0.792024		III	2645900	0.445041		II	14676500	0.203749		II	13904700	0.62724		II	13941300	0.26904
chrIII	6829000	0.903771		II	13936100	0.222195		III	2726400	0.563959		II	14700300	0.845644		II	13940700	0.211872		II	13966900	0.423037
chrIII	6871200	0.174032		II	13974900	0.585342		III	2761100	0.188684		II	14804800	0.956399		II	13966900	0.39964		II	13993900	0.158093
chrIII	6928800	0.27227		II	14018300	0.306571		III	2811500	0.472574		II	14831600	0.334864		II	14018200	0.239832		II	14019400	0.34857
chrIII	6977100	0.732792		II	14050800	0.673306		III	2871800	0.284678		II	14869100	0.311734		II	14040400	0.305468		II	14042700	0.59537
chrIII	7031600	0.505241		II	14089000	0.468969		III	2909900	0.740193		II	14892300	0.488784		II	14060900	0.620584		II	14061300	0.568707
chrIII	7070700	0.779061		II	14143200	0.649143		III	2976700	0.853097		II	14980500	0.532841		II	14093200	0.191454		II	14096400	0.299533
chrIII	7119100	0.388405		II	14187000	0.830343		III	3043000	0.377146		II	15005700	0.732111		II	14137500	0.70514		II	14137200	0.793593
chrIII	7160400	0.427066		II	14254500	0.845949		III	3065800	0.32428		II	15035600	0.671038		II	14187300	0.736538		II	14187400	0.781037
chrIII	7179900	0.533139		II	14280600	0.1891		III	3086500	0.720708		II	15056400	0.702932		II	14251300	0.57629		II	14244900	0.742736
chrIII	7208200	0.181406		II	14294800	0.302949		III	3131900	0.289717		II	15084700	0.416401		II	14294700	0.16603		II	14295500	0.193319
chrIII	7236600	0.321171		II	14317000	0.661799		III	3158500	0.457157		II	15103100	0.715963		II	14317500	0.569095		II	14317400	0.352449
chrIII	7276000	0.361701		II	14349700	0.858722		III	3188500	0.43131		II	15129100	0.475064		II	14354000	0.907337		II	14353800	0.604154
chrIII	7318800	0.204593		II	14382500	0.180171		III	3231600	0.195427		II	15144800	0.535858		II	14382600	0.1983		II	14381700	0.306239
chrIII	7339100	0.318826		II	14406200	0.816578		III	3265900	0.711709		II	15189900	0.263437		II	14406200	0.627187		II	14405500	0.380092
chrIII	7377100	0.446904		II	14439600	0.774601		III	3296800	0.280879		II	15232000	0.523284		II	14440600	0.55678		II	14433500	0.561923
chrIII	7404700	0.251056		II	14484000	0.545398		III	3331300	0.43181		II	15256200	0.628204		II	14466900	0.0772698		II	14466100	0.278594
chrIII	7495400	0.538341		II	14548600	0.546702		III	3393400	0.797329		III	3000	0.677849		II	14489700	0.407118		II	14492200	0.31671
chrIII	7570300	0.723421		II	14564900	0.546702		III	3421300	0.407674		III	36100	0.742416		II	14548700	0.543516		II	14516800	0.380549
chrIII	7620900	0.274276		II	14591700	0.430757		III	3467500	0.45494		III	71400	0.601782		II	14566400	0.211155		II	14548900	0.592347
chrIII	7659400	0.911432		II	14639900	0.811685		III	3510200	0.409198		III	103100	0.619366		II	14593800	0.153703		II	14572900	0.581491
chrIII	7715400	0.866638		II	14676100	0.259126		III	3535200	0.468299		III	128600	0.221826		II	14639800	0.670535		II	14593600	0.492622
chrIII	7730100	0.864901		II	14698300	0.479776		III	3624000	0.866251		III	148500	0.191534		II	14697300	0.43795		II	14648100	0.777085
chrIII	7774200	0.480071		II	14747400	0.740485		III	3646100	0.606347		III	177500	0.757762		II	14724100	0.71218		II	14696800	0.359326
chrIII	7826800	0.121596		II	14804000	0.930518		III	3678300	0.11233		III	214400	0.725558		II	14755700	0.638919		II	14724100	0.742073
chrIII	7860500	0.536143		II	14831600	0.264256		III	3706400	0.698279		III	263700	0.371821		II	14787300	0.380385		II	14753000	0.573061
chrIII	7911800	0.341891		II	14868600	0.34129		III	3734800	0.521059		III	299900	0.814688		II	14805400	0.559193		II	14786300	0.431919
chrIII	7962400	0.580882		II	14898600	0.227262		III	3800700	0.506289		III	358400	0.80855		II	14838000	0.223353		II	14805400	0.883188
chrIII	8023300	0.470194		II	14916700	0.515733		III	3821600	0.752287		III	401100	0.666085		II	14872400	0.259482		II	14831800	0.597415
chrIII	8081700	0.154799		II	14980400	0.510437		III	3870000	0.789829		III	432400	0.794844		II	14899700	0.267583		II	14891400	0.726871
chrIII	8100300	0.344786		II	15005100	0.665048		III	3904500	0.470344		III	464500	0.313049		II	14963300	0.615853		II	14926000	0.243772
chrIII	8128000	0.781135		II	15053200	0.610539		III	3921000	0.470344		III	480500	0.588575		II	14984500	0.247549		II	14984600	0.263421
chrIII	8157800	0.515239		II	15103600	0.541597		III	3949600	0.24723		III	500600	0.583992		II	15008000	0.413742		II	15007000	0.248928
chrIII	8242300	0.433138		II	15129200	0.626019		III	3976700	0.202037		III	539700	0.536641		II	15039200	0.576387		II	15052800	0.626321
chrIII	8300600	0.591834		II	15149000	0.364062		III	4011100	0.553137		III	559100	0.517057		II	15056600	0.576387		II	15085000	0.68526
chrIII	8370200	0.964727		II	15187000	0.158789		III	4046000	0.332184		III	580900	0.455068		II	15085100	0.0818893		II	15103000	0.339515
chrIII	8423300	0.70708		II	15232200	0.88639		III	4096400	0.863303		III	627100	0.648072		II	15103000	0.653053		II	15129200	0.40758
chrIII	8449600	0.420791		II	15261700	0.666405		III	4157500	0.24941		III	663200	0.400989		II	15129500	0.494007		II	15150200	0.281857
chrIII	8489900	0.637897		III	4200	0.728761		III	4195900	0.650971		III	724000	0.611361		II	15184900	0.115035		II	15186700	0.363074
chrIII	8504900	0.62559		III	38000	0.708527		III	4248600	0.224548		III	755000	0.390247		II	15232000	0.709782		II	15261100	0.554343
chrIII	8528800	0.501636		III	71200	0.585915		III	4275700	0.80644		III	792400	0.544735		III	2700	0.770529		III	2700	0.6535
chrIII	8601600	0.42785		III	103100	0.500231		III	4359900	0.549749		III	836200	0.87133		III	37200	0.585302		III	43100	0.420721
chrIII	8624200	0.756939		III	128800	0.176745		III	4404900	0.275026		III	868200	0.536255		III	71900	0.368628		III	72200	0.616313
chrIII	8688600	0.436584		III	146200	0.35924		III	4446000	0.271337		III	891600	0.574243		III	103800	0.181687		III	108300	0.518806
chrIII	8737100	0.166279		III	178000	0.763963		III	4472400	0.755963		III	908400	0.313298		III	128800	0.238545		III	149300	0.190372
chrIII	8797800	0.799524		III	211500	0.754612		III	4514200	0.88586		III	951900	0.492696		III	151300	0.134124		III	174400	0.662551
chrIII	8852000	0.495062		III	300000	0.757532		III	4564700	0.497868		III	984300	0.469665		III	177600	0.628641		III	263300	0.574039
chrIII	8874100	0.325618		III	323200	0.728712		III	4597700	0.121285		III	1063800	0.427568		III	263400	0.436697		III	300500	0.717422
chrIII	8902200	0.552074		III	354300	0.821858		III	4621200	0.480739		III	1085000	0.451043		III	300300	0.64832		III	358400	0.627761
chrIII	8957800	0.367587		III	401400	0.781222		III	4668200	0.802849		III	1116500	0.201144		III	358400	0.654094		III	404700	0.649923
chrIII	8983200	0.200585		III	432700	0.816212		III	4693900	0.396709		III	1141800	0.613365		III	404300	0.4183		III	435700	0.636422
chrIII	9008700	0.477741		III	464500	0.17772		III	4751300	0.694134		III	1159400	0.613365		III	432700	0.676641		III	500300	0.559295
chrIII	9050200	0.401251		III	480300	0.552813		III	4785400	0.290623		III	1188900	0.636177		III	497200	0.521824		III	540700	0.694522
chrIII	9069000	0.801359		III	500600	0.430915		III	4806300	0.67978		III	1214800	0.64749		III	535100	0.24113		III	559300	0.687846
chrIII	9115400	0.731578		III	535200	0.631656		III	4851200	0.173393		III	1236200	0.818612		III	559000	0.303549		III	581100	0.52358
chrIII	9181300	0.777636		III	559400	0.478731		III	4900400	0.488068		III	1403300	0.353898		III	581200	0.544		III	617800	0.633298
chrIII	9229400	0.6254		III	580700	0.501099		III	4926300	0.603127		III	1431900	0.386858		III	618100	0.580124		III	635100	0.618518
chrIII	9247300	0.752676		III	626800	0.432806		III	4990800	0.280023		III	1458400	0.828506		III	635000	0.277722		III	663200	0.399208
chrIII	9328200	0.522166		III	663900	0.362525		III	5012100	0.565366		III	1547000	0.527203		III	662500	0.467505		III	729700	0.686177
chrIII	9343900	0.63856		III	689300	0.254967		III	5033200	0.754219		III	1607700	0.852969		III	725100	0.579079		III	772300	0.344221
chrIII	9386700	0.107738		III	723200	0.564352		III	5073600	0.205672		III	1680400	0.411561		III	754800	0.456299		III	839100	0.72762
chrIII	9409100	0.613976		III	754700	0.111444		III	5109500	0.356881		III	1705200	0.386712		III	773100	0.322384		III	874100	0.427761
chrIII	9447400	0.869905		III	791700	0.74457		III	5146000	0.403152		III	1757200	0.525023		III	789400	0.732708		III	899500	0.385438
chrIII	9515700	0.309347		III	836200	0.842048		III	5178700	0.642893		III	1817500	0.190602		III	836000	0.34788		III	952900	0.765777
chrIII	9546400	0.457809		III	868100	0.581494		III	5227300	0.555572		III	1837500	0.549039		III	869500	0.396788		III	984800	0.661521
chrIII	9620900	0.746306		III	893100	0.497624		III	5244500	0.495771		III	1853200	0.679727		III	906000	0.414219		III	1064500	0.766753
chrIII	9665000	0.281957		III	910800	0.486666		III	5277600	0.337428		III	1891200	0.339015		III	938600	0.275373		III	1094400	0.204401
chrIII	9699600	0.813947		III	950000	0.888889		III	5383200	0.12112		III	1922700	0.640744		III	985200	0.332817		III	1116700	0.531762
chrIII	9746800	0.404644		III	985300	0.470152		III	5407500	0.149165		III	1945600	0.642901		III	1006200	0.28892		III	1134600	0.531762
chrIII	9767900	0.394128		III	1010300	0.558659		III	5446000	0.530038		III	1988700	0.283165		III	1047000	0.642799		III	1159100	0.374666
chrIII	9820900	0.602723		III	1040400	0.27379		III	5500000	0.494862		III	2032100	0.501287		III	1063700	0.5872		III	1189100	0.656698
chrIII	9861200	0.433476		III	1063700	0.666599		III	5544100	0.704749		III	2057400	0.333455		III	1094600	0.154149		III	1231500	0.761501
chrIII	9967000	0.663192		III	1080500	0.596819		III	5587200	0.195133		III	2089500	0.429149		III	1116600	0.176517		III	1255300	0.477483
chrIII	9993300	0.583204		III	1116400	0.236959		III	5618700	0.577683		III	2122900	0.671186		III	1144600	0.159073		III	1286100	0.455204
chrIII	10059500	0.451893		III	1142200	0.322181		III	5659800	0.42843		III	2167400	0.716705		III	1189100	0.315542		III	1324100	0.225496
chrIII	10096400	0.331773		III	1188800	0.289317		III	5720700	0.683153		III	2232300	0.576217		III	1213500	0.415818		III	1356500	0.3039
chrIII	10119500	0.556124		III	1228400	0.816363		III	5787100	0.416055		III	2276400	0.133798		III	1231200	0.562595		III	1391400	0.822193
chrIII	10162200	0.28734		III	1267800	0.85364		III	5807600	0.83532		III	2324100	0.741854		III	1307700	0.687985		III	1430500	0.453807
chrIII	10197900	0.790534		III	1356600	0.66084		III	5846900	0.480171		III	2373600	0.282669		III	1376200	0.29612		III	1458300	0.797168
chrIII	10249900	0.4159		III	1377300	0.787891		III	5872100	0.57874		III	2397400	0.646257		III	1397400	0.670066		III	1547700	0.630416
chrIII	10264000	0.753611		III	1413200	0.865946		III	5905600	0.56375		III	2423900	0.839474		III	1430200	0.539609		III	1593600	0.490847
chrIII	10320000	0.575567		III	1428700	0.865946		III	5936500	0.707411		III	2475300	0.420257		III	1458800	0.754009		III	1619000	0.704594
chrIII	10407300	0.700193		III	1458400	0.832151		III	5961600	0.549545		III	2508500	0.870345		III	1499700	0.257158		III	1648000	0.298792
chrIII	10438800	0.277381		III	1489500	0.295051		III	5987600	0.384401		III	2549100	0.657836		III	1526200	0.232062		III	1682500	0.229906
chrIII	10475300	0.553336		III	1527300	0.426795		III	6048800	0.382547		III	2584400	0.447448		III	1547800	0.428254		III	1738900	0.248438
chrIII	10505600	0.289561		III	1547400	0.63119		III	6108200	0.273071		III	2612000	0.3599		III	1572300	0.208408		III	1763100	0.6302
chrIII	10567000	0.531844		III	1598400	0.533387		III	6136400	0.318792		III	2645900	0.525068		III	1594300	0.235275		III	1817700	0.334313
chrIII	10625200	0.26619		III	1622700	0.720911		III	6156500	0.325501		III	2674500	0.827537		III	1622700	0.386032		III	1853500	0.68929
chrIII	10668500	0.703953		III	1681000	0.807458		III	6175700	0.498306		III	2712200	0.769174		III	1681000	0.652793		III	1892800	0.341264
chrIII	10718700	0.264281		III	1739000	0.189747		III	6205900	0.604052		III	2726600	0.616724		III	1706100	0.561269		III	1918800	0.725652
chrIII	10757300	0.564423		III	1774400	0.659531		III	6240700	0.203115		III	2756500	0.626784		III	1738600	0.502405		III	1945800	0.296243
chrIII	10818600	0.790882		III	1817700	0.695758		III	6281100	0.892371		III	2809300	0.672443		III	1758500	0.710382		III	1998600	0.375472
chrIII	10877800	0.42097		III	1836900	0.463897		III	6342400	0.550849		III	2871700	0.262072		III	1822200	0.669179		III	2030500	0.463474
chrIII	10910600	0.352622		III	1870500	0.341142		III	6379000	0.343368		III	2902900	0.736339		III	1893000	0.201121		III	2055400	0.28798
chrIII	10931500	0.452443		III	1893500	0.159483		III	6421800	0.719829		III	2976300	0.863578		III	1945800	0.406732		III	2085900	0.571498
chrIII	11033600	0.127673		III	1922000	0.79612		III	6453500	0.414249		III	3042800	0.378399		III	1992100	0.246133		III	2123100	0.596526
chrIII	11062600	0.388422		III	1945700	0.587527		III	6478800	0.649127		III	3086500	0.76487		III	2032200	0.537879		III	2162600	0.56879
chrIII	11141700	0.605732		III	1988600	0.271283		III	6532200	0.348788		III	3125000	0.447315		III	2085800	0.326218		III	2187600	0.646695
chrIII	11245900	0.336695		III	2032200	0.526565		III	6557500	0.714063		III	3188700	0.483956		III	2123100	0.485905		III	2232100	0.652767
chrIII	11288200	0.604825		III	2058200	0.321276		III	6605200	0.661196		III	3226300	0.657952		III	2169300	0.516191		III	2281600	0.320931
chrIII	11355700	0.318128		III	2085700	0.822516		III	6630100	0.466469		III	3260600	0.700098		III	2188800	0.637221		III	2306400	0.314671
chrIII	11380800	0.559956		III	2123100	0.553931		III	6711000	0.499895		III	3297300	0.508307		III	2233000	0.43089		III	2330200	0.375519
chrIII	11455500	0.34619		III	2166300	0.637609		III	6733200	0.689913		III	3331300	0.549335		III	2281200	0.240073		III	2372600	0.276679
chrIII	11481500	0.769158		III	2188600	0.70352		III	6794200	0.145308		III	3393200	0.863461		III	2306200	0.251039		III	2396500	0.400139
chrIII	11560200	0.831941		III	2232400	0.523173		III	6828700	0.906137		III	3424100	0.418423		III	2330500	0.381772		III	2442300	0.741205
chrIII	11624400	0.194908		III	2330700	0.831357		III	6869000	0.642801		III	3467500	0.505001		III	2375600	0.294572		III	2475900	0.295593
chrIII	11649400	0.087036		III	2373500	0.305579		III	6927800	0.366495		III	3487000	0.812119		III	2396800	0.58878		III	2505000	0.691944
chrIII	11723200	0.379996		III	2397400	0.619885		III	6976800	0.704513		III	3510400	0.206995		III	2424400	0.493006		III	2534600	0.489821
chrIII	11746300	0.367211		III	2424100	0.755592		III	7035300	0.360616		III	3535100	0.374496		III	2444000	0.684629		III	2558000	0.594772
chrIII	11826200	0.513447		III	2475500	0.284717		III	7085500	0.830997		III	3585900	0.208945		III	2475900	0.296903		III	2620400	0.484149
chrIII	11849900	0.644954		III	2500300	0.892388		III	7119500	0.360433		III	3623900	0.577657		III	2500500	0.673031		III	2645800	0.48882
chrIII	11864300	0.508858		III	2533800	0.526206		III	7165800	0.743098		III	3646000	0.496067		III	2534500	0.627554		III	2674200	0.747188
chrIII	11909100	0.868851		III	2556900	0.56413		III	7199400	0.273692		III	3673900	0.167525		III	2577600	0.394687		III	2712000	0.677569
chrIII	11969700	0.616273		III	2584300	0.537623		III	7226500	0.18196		III	3706500	0.733168		III	2612200	0.56811		III	2729000	0.327599
chrIII	12001500	0.239015		III	2612500	0.478315		III	7247300	0.395622		III	3738700	0.427021		III	2648000	0.496788		III	2756500	0.580801
chrIII	12031200	0.139534		III	2645800	0.521597		III	7275900	0.379621		III	3856000	0.842929		III	2674600	0.549487		III	2793300	0.619618
chrIII	12061900	0.160309		III	2676500	0.841879		III	7340900	0.617623		III	3904000	0.387597		III	2726600	0.481071		III	2874500	0.158379
chrIII	12141900	0.79876		III	2726000	0.651865		III	7377600	0.445122		III	3921900	0.404797		III	2750800	0.354624		III	2914500	0.713025
chrIII	12221700	0.643942		III	2756300	0.19225		III	7464800	0.563968		III	3949600	0.464226		III	2782800	0.489123		III	2947000	0.196386
chrIII	12250900	0.34961		III	2781700	0.310045		III	7499100	0.397522		III	4010900	0.82967		III	2811300	0.464106		III	2976300	0.887683
chrIII	12336300	0.099879		III	2809100	0.659429		III	7522600	0.575305		III	4046000	0.44261		III	2882100	0.372716		III	3009500	0.753555
chrIII	12366400	0.804567		III	2903200	0.690529		III	7554500	0.535783		III	4097000	0.73663		III	2910700	0.629508		III	3027800	0.00968292
chrIII	12425000	0.514698		III	2976300	0.755726		III	7573200	0.763989		III	4160500	0.494227		III	2945700	0.74781		III	3042300	0.383872
chrIII	12454400	0.453201		III	3042200	0.736597		III	7616100	0.480066		III	4195600	0.734709		III	2976400	0.642935		III	3064400	0.328354
chrIII	12497300	0.197098		III	3067000	0.650564		III	7657500	0.950802		III	4248600	0.396113		III	3012200	0.704251		III	3095200	0.55175
chrIII	12527800	0.311816		III	3086600	0.83962		III	7713400	0.842941		III	4283300	0.656522		III	3037700	0.48028		III	3124200	0.20747
chrIII	12576900	0.601416		III	3125000	0.37751		III	7766000	0.204164		III	4331000	0.238108		III	3065800	0.256441		III	3158200	0.548921
chrIII	12614500	0.755319		III	3158200	0.484705		III	7786700	0.509061		III	4360000	0.672661		III	3094900	0.599863		III	3185400	0.526225
chrIII	12688200	0.416959		III	3188500	0.457612		III	7853200	0.475307		III	4405000	0.291064		III	3124300	0.208014		III	3230900	0.662742
chrIII	12711500	0.537572		III	3226200	0.608617		III	7911900	0.357085		III	4451100	0.237766		III	3158300	0.484111		III	3260600	0.28856
chrIII	12746200	0.128463		III	3260700	0.244188		III	7962100	0.607962		III	4472300	0.641756		III	3231600	0.40917		III	3303100	0.497852
chrIII	12815700	0.18411		III	3282000	0.582694		III	8006700	0.610643		III	4509300	0.889353		III	3260600	0.520023		III	3344600	0.440112
chrIII	12876300	0.545777		III	3296500	0.553055		III	8023900	0.767622		III	4564900	0.603643		III	3277700	0.193876		III	3391900	0.491835
chrIII	12895200	0.84846		III	3331100	0.369849		III	8100100	0.5157		III	4599300	0.316287		III	3296500	0.457234		III	3417400	0.256384
chrIII	12927500	0.345553		III	3393400	0.57515		III	8129700	0.698728		III	4621400	0.564539		III	3325900	0.302511		III	3442700	0.338416
chrIII	12975900	0.655098		III	3417800	0.691143		III	8164800	0.417653		III	4668600	0.771278		III	3393600	0.619919		III	3464300	0.199113
chrIII	13065200	0.94375		III	3442700	0.226827		III	8218300	0.171136		III	4693800	0.119787		III	3417600	0.676588		III	3486500	0.642186
chrIII	13106000	0.165586		III	3467500	0.51936		III	8254200	0.69345		III	4709700	0.167899		III	3464500	0.528723		III	3514300	0.247101
chrIII	13155600	0.087543		III	3494200	0.661994		III	8278200	0.295471		III	4745900	0.17851		III	3487100	0.390459		III	3542400	0.673348
chrIII	13180800	0.451142		III	3510100	0.410877		III	8305900	0.615771		III	4785300	0.183012		III	3509900	0.288098		III	3585900	0.216276
chrIII	13227500	0.27775		III	3535200	0.355376		III	8362300	0.780632		III	4810700	0.383983		III	3535100	0.573821		III	3624900	0.720576
chrIII	13258100	0.873646		III	3585700	0.289141		III	8422800	0.534932		III	4851200	0.148579		III	3586100	0.147296		III	3708100	0.6243
chrIII	13296500	0.515181		III	3625000	0.622804		III	8447900	0.551763		III	4900200	0.538252		III	3625500	0.47675		III	3730700	0.25935
chrIII	13314300	0.577662		III	3647100	0.668242		III	8487700	0.753454		III	4924500	0.637768		III	3706700	0.676		III	3783400	0.807412
chrIII	13340800	0.277609		III	3678300	0.163898		III	8529000	0.38266		III	4965100	0.430973		III	3738800	0.321396		III	3801300	0.682919
chrIII	13393300	0.208733		III	3706400	0.786136		III	8553000	0.46047		III	4990800	0.245118		III	3800800	0.280583		III	3865600	0.754309
chrIII	13421000	0.257229		III	3738200	0.531702		III	8603400	0.810694		III	5012400	0.550976		III	3820500	0.672728		III	3923300	0.336346
chrIII	13463500	0.771589		III	3801100	0.858558		III	8695500	0.498174		III	5036300	0.708811		III	3922900	0.534889		III	3959600	0.243301
chrIII	13533800	0.315954		III	3820900	0.747607		III	8743100	0.193021		III	5073400	0.155689		III	3957300	0.0818651		III	3990900	0.224252
chrIII	13562900	0.512749		III	3857600	0.863101		III	8763800	0.713524		III	5090600	0.0804212		III	3975900	0.167502		III	4011400	0.363689
chrIII	13637400	0.421086		III	3921400	0.647315		III	8794100	0.840273		III	5109400	0.280859		III	4011100	0.401776		III	4041800	0.495934
chrIII	13662400	0.595541		III	3951000	0.362287		III	8852300	0.547252		III	5144900	0.454472		III	4046100	0.410111		III	4091000	0.410986
chrIII	13716400	0.789699		III	3980400	0.142151		III	8895300	0.692131		III	5178500	0.657554		III	4091100	0.724822		III	4156900	0.408793
chrIII	13764300	0.649859		III	4006100	0.688526		III	8957900	0.537827		III	5225000	0.369814		III	4156800	0.366174		III	4195400	0.499105
chrIV	10900	1		III	4020400	0.798779		III	8988800	0.511101		III	5249400	0.385645		III	4196100	0.54987		III	4247500	0.386975
chrIV	46200	0.966793		III	4046200	0.419433		III	9002600	0.567615		III	5282300	0.0988786		III	4247700	0.352564		III	4276200	0.500224
chrIV	127200	0.378595		III	4096000	0.831473		III	9047300	0.264202		III	5332200	0.325668		III	4274300	0.386343		III	4323800	0.225133
chrIV	150000	0.749335		III	4157500	0.521391		III	9069000	0.627726		III	5386100	0.740848		III	4323200	0.135606		III	4364400	0.594189
chrIV	180900	0.723598		III	4195700	0.817762		III	9112900	0.687184		III	5406600	0.139442		III	4360000	0.475637		III	4405300	0.462662
chrIV	256000	0.389847		III	4246500	0.727063		III	9178700	0.827602		III	5439300	0.752424		III	4405100	0.435988		III	4441900	0.281532
chrIV	313000	0.191003		III	4332800	0.156134		III	9225500	0.593179		III	5500000	0.670759		III	4442600	0.392331		III	4470000	0.716609
chrIV	341900	0.24323		III	4360000	0.606677		III	9247000	0.796519		III	5544200	0.566641		III	4472200	0.216391		III	4508600	0.754549
chrIV	384000	0.849209		III	4402500	0.523046		III	9278700	0.192022		III	5587200	0.267804		III	4514800	0.770216		III	4572600	0.62675
chrIV	424100	0.215496		III	4444700	0.457707		III	9318500	0.459467		III	5618500	0.624541		III	4566500	0.496136		III	4626000	0.476778
chrIV	447100	0.358471		III	4472400	0.427196		III	9346100	0.506833		III	5660700	0.605875		III	4621600	0.544437		III	4666500	0.621677
chrIV	521800	0.319418		III	4509400	0.864913		III	9369100	0.367228		III	5721000	0.653031		III	4668600	0.646634		III	4694000	0.351687
chrIV	559500	0.794387		III	4564900	0.679245		III	9407200	0.231638		III	5787000	0.33619		III	4694000	0.512471		III	4724900	0.328273
chrIV	658600	0.57155		III	4616500	0.587842		III	9455500	0.806964		III	5808600	0.579177		III	4726000	0.283555		III	4810500	0.605399
chrIV	677800	0.728471		III	4649700	0.606576		III	9485200	0.235357		III	5847100	0.653929		III	4751400	0.657572		III	4854900	0.41896
chrIV	712000	0.095964		III	4668900	0.761074		III	9507600	0.344072		III	5872100	0.345458		III	4785600	0.137526		III	4884700	0.745493
chrIV	735000	0.389932		III	4694000	0.374511		III	9539800	0.598173		III	5905600	0.532026		III	4806400	0.448366		III	4924300	0.44192
chrIV	769700	0.500283		III	4751000	0.718468		III	9567300	0.22835		III	5935800	0.746002		III	4851100	0.442807		III	4948600	0.165161
chrIV	829000	0.330806		III	4785200	0.182877		III	9603700	0.478354		III	5961500	0.494579		III	4900200	0.289163		III	4969800	0.334515
chrIV	903500	0.874116		III	4810900	0.501112		III	9619700	0.782884		III	5986500	0.55383		III	4924200	0.277543		III	4990900	0.306161
chrIV	957000	0.736618		III	4851000	0.309575		III	9674500	0.42119		III	6049200	0.27472		III	4947200	0.0732861		III	5011400	0.417465
chrIV	990900	0.20272		III	4877900	0.185021		III	9695400	0.652806		III	6108200	0.412069		III	4969900	0.306625		III	5035000	0.645563
chrIV	1013100	0.491237		III	4900200	0.691916		III	9754100	0.763909		III	6136400	0.359251		III	4990700	0.195534		III	5073100	0.360925
chrIV	1054400	0.357372		III	4924300	0.717568		III	9774100	0.603823		III	6157000	0.680522		III	5011500	0.350895		III	5104400	0.165175
chrIV	1103800	0.588391		III	4964000	0.422706		III	9820100	0.682176		III	6175100	0.574202		III	5036200	0.590249		III	5147200	0.318891
chrIV	1175400	0.645611		III	4990800	0.329068		III	9866400	0.417948		III	6205700	0.579948		III	5073500	0.215184		III	5179800	0.230663
chrIV	1204600	0.659986		III	5014600	0.530901		III	9913400	0.416654		III	6240500	0.28826		III	5109300	0.590701		III	5222000	0.547941
chrIV	1277500	0.542951		III	5039100	0.672425		III	9949300	0.362744		III	6285900	0.868302		III	5142600	0.219748		III	5245300	0.565943
chrIV	1305200	0.466294		III	5073400	0.347733		III	9969600	0.727224		III	6335000	0.728932		III	5178300	0.550729		III	5282800	0.105946
chrIV	1346700	0.387996		III	5109300	0.452331		III	9990700	0.738605		III	6359800	0.250573		III	5227200	0.645906		III	5314200	0.297334
chrIV	1360700	0.672858		III	5147600	0.14405		III	10056600	0.283169		III	6379400	0.197727		III	5249200	0.373996		III	5336300	0.440059
chrIV	1390500	0.168351		III	5178400	0.733186		III	10098600	0.443895		III	6398000	0.19418		III	5274800	0.23655		III	5366500	0.138083
chrIV	1418900	0.274804		III	5204200	0.166607		III	10164000	0.343667		III	6421500	0.69579		III	5316600	0.217788		III	5402200	0.335181
chrIV	1446700	0.130638		III	5226100	0.576071		III	10196100	0.554799		III	6454500	0.366254		III	5366200	0.103727		III	5429200	0.435939
chrIV	1497000	0.616235		III	5247200	0.548692		III	10260300	0.347726		III	6478800	0.611854		III	5402400	0.448525		III	5455700	0.362594
chrIV	1601900	0.817154		III	5277100	0.451787		III	10325000	0.372172		III	6531800	0.469267		III	5445900	0.702272		III	5502300	0.748231
chrIV	1652300	0.387434		III	5324900	0.487218		III	10350100	0.548127		III	6554500	0.725179		III	5500000	0.352595		III	5551500	0.660047
chrIV	1707700	0.440905		III	5383300	0.288006		III	10401100	0.79849		III	6605100	0.693995		III	5544200	0.51675		III	5586500	0.330715
chrIV	1752000	0.680814		III	5407300	0.303347		III	10438800	0.227646		III	6631100	0.18318		III	5586900	0.294976		III	5611100	0.560651
chrIV	1806800	0.327475		III	5445800	0.690974		III	10475100	0.482596		III	6657200	0.406833		III	5617600	0.582192		III	5659900	0.464668
chrIV	1845400	0.318117		III	5499800	0.737812		III	10566800	0.254652		III	6733500	0.667433		III	5660800	0.241477		III	5724200	0.612596
chrIV	1898100	0.71797		III	5544100	0.678079		III	10586900	0.731709		III	6794200	0.0881061		III	5679800	0.440488		III	5787700	0.291577
chrIV	1973400	0.424683		III	5587400	0.340266		III	10628700	0.314094		III	6825500	0.815143		III	5723900	0.586529		III	5807300	0.80411
chrIV	1999400	0.451412		III	5618600	0.465756		III	10666400	0.654554		III	6869000	0.563944		III	5787500	0.373043		III	5829200	0.642235
chrIV	2034800	0.300028		III	5659900	0.494414		III	10722300	0.372046		III	6927400	0.328449		III	5807300	0.591456		III	5854400	0.50113
chrIV	2061400	0.198397		III	5721400	0.561183		III	10748100	0.698587		III	6978500	0.659885		III	5854700	0.318174		III	5902300	0.279258
chrIV	2083700	0.292301		III	5786800	0.76195		III	10822500	0.829077		III	7035400	0.336599		III	5873800	0.646429		III	5937000	0.649348
chrIV	2135100	0.418974		III	5807700	0.776831		III	10873100	0.26589		III	7085400	0.77952		III	5901500	0.421205		III	5965400	0.506587
chrIV	2177700	0.75471		III	5847800	0.333214		III	10909600	0.648803		III	7119400	0.766689		III	5936600	0.402769		III	5991900	0.406287
chrIV	2219000	0.890197		III	5873900	0.665681		III	10956700	0.204384		III	7165900	0.704688		III	5965300	0.304993		III	6040600	0.529985
chrIV	2296800	0.257357		III	5905800	0.674734		III	11012400	0.48111		III	7198900	0.356003		III	5990400	0.217817		III	6087700	0.658931
chrIV	2322100	0.520025		III	5939300	0.42335		III	11069600	0.579322		III	7225400	0.357827		III	6045600	0.559238		III	6105100	0.626697
chrIV	2387700	0.654933		III	5960100	0.516559		III	11093900	0.587174		III	7247300	0.533928		III	6087800	0.122002		III	6174200	0.331308
chrIV	2419300	0.351036		III	5986500	0.579661		III	11141900	0.738161		III	7275400	0.387918		III	6108200	0.223903		III	6204900	0.51193
chrIV	2491500	0.669144		III	6024700	0.089081		III	11174400	0.228151		III	7347100	0.285863		III	6133200	0.193848		III	6238300	0.202163
chrIV	2611000	0.688831		III	6048000	0.580636		III	11215700	0.183905		III	7369600	0.414054		III	6152700	0.640195		III	6284000	0.596628
chrIV	2639500	0.49125		III	6074400	0.280876		III	11235000	0.693018		III	7447100	0.422608		III	6206100	0.576474		III	6337500	0.56732
chrIV	2675600	0.477374		III	6108200	0.297434		III	11279900	0.434505		III	7499300	0.278611		III	6240000	0.365117		III	6369900	0.533398
chrIV	2709800	0.458032		III	6142300	0.711926		III	11304200	0.262723		III	7522500	0.530036		III	6280700	0.70313		III	6421900	0.697691
chrIV	2778000	0.455003		III	6157800	0.7885		III	11326600	0.262302		III	7554700	0.539801		III	6342600	0.680023		III	6454200	0.201677
chrIV	2801300	0.447881		III	6205900	0.658972		III	11351300	0.761209		III	7580300	0.623558		III	6376000	0.505172		III	6530900	0.29616
chrIV	2899300	0.530669		III	6241000	0.604985		III	11381300	0.404437		III	7616300	0.544449		III	6421900	0.622303		III	6562600	0.699725
chrIV	2996000	0.686891		III	6285600	0.857851		III	11407800	0.410714		III	7655200	0.952742		III	6453200	0.37779		III	6605000	0.568574
chrIV	3054600	0.704545		III	6342400	0.691859		III	11448200	0.885856		III	7716900	0.848293		III	6479000	0.617559		III	6631300	0.332468
chrIV	3094700	0.426843		III	6379200	0.39389		III	11481900	0.858817		III	7763200	0.205312		III	6495400	0.617559		III	6677000	0.218362
chrIV	3161200	0.776879		III	6421900	0.836642		III	11515300	0.432546		III	7787500	0.328876		III	6531500	0.378991		III	6711300	0.462488
chrIV	3233100	0.909399		III	6453600	0.414203		III	11556600	0.818455		III	7849900	0.456828		III	6605900	0.656388		III	6734800	0.645296
chrIV	3275000	0.675617		III	6478800	0.638967		III	11588200	0.365608		III	7912000	0.595391		III	6630200	0.316937		III	6832300	0.888991
chrIV	3333900	0.729889		III	6530900	0.39781		III	11624300	0.505411		III	7962100	0.431141		III	6651500	0.488823		III	6877900	0.406438
chrIV	3374800	0.472802		III	6554300	0.784928		III	11659100	0.278884		III	8006400	0.77247		III	6711300	0.450544		III	6942900	0.274928
chrIV	3390400	0.461283		III	6605400	0.567478		III	11678900	0.236794		III	8070100	0.408945		III	6794200	0.295315		III	6986100	0.428351
chrIV	3516400	0.668215		III	6630900	0.451476		III	11714000	0.574472		III	8098300	0.736963		III	6825400	0.783177		III	7035500	0.317811
chrIV	3580400	0.375381		III	6654700	0.250022		III	11751100	0.583226		III	8130000	0.591585		III	6869100	0.41048		III	7070300	0.756538
chrIV	3601500	0.558638		III	6793800	0.311776		III	11787700	0.198642		III	8218300	0.327594		III	6927500	0.331058		III	7086100	0.756538
chrIV	3651300	0.573344		III	6825600	0.817636		III	11829800	0.725441		III	8254300	0.46512		III	6978800	0.429176		III	7119400	0.259328
chrIV	3726000	0.128881		III	6868400	0.705123		III	11859600	0.696532		III	8278200	0.454855		III	7032000	0.443551		III	7144900	0.182246
chrIV	3744900	0.478133		III	6897300	0.370411		III	11933700	0.779322		III	8305800	0.564668		III	7070500	0.777203		III	7171000	0.441456
chrIV	3766200	0.696742		III	6927300	0.494354		III	11959000	0.362638		III	8339600	0.579882		III	7085400	0.777203		III	7202800	0.189834
chrIV	3826200	0.551027		III	6978400	0.625082		III	11999400	0.582131		III	8362300	0.709071		III	7119500	0.376505		III	7226300	0.319115
chrIV	3987600	0.403268		III	7035100	0.637784		III	12031800	0.534952		III	8422800	0.768064		III	7161800	0.398052		III	7276300	0.535497
chrIV	4019500	0.641804		III	7085400	0.859737		III	12068100	0.305609		III	8455300	0.403149		III	7202200	0.159844		III	7319000	0.301656
chrIV	4050300	0.305401		III	7121700	0.578941		III	12101400	0.38872		III	8487100	0.726241		III	7247000	0.454671		III	7345000	0.359455
chrIV	4078400	0.442065		III	7165600	0.746117		III	12147100	0.878135		III	8528900	0.479876		III	7276400	0.349166		III	7366400	0.329426
chrIV	4160700	0.86915		III	7199400	0.375835		III	12180700	0.187015		III	8553300	0.475421		III	7385900	0.485189		III	7385900	0.444179
chrIV	4187000	0.793428		III	7226400	0.233474		III	12229100	0.81852		III	8603500	0.748265		III	7495600	0.460448		III	7495200	0.578346
chrIV	4243300	0.425016		III	7247400	0.450882		III	12250900	0.681659		III	8620100	0.729641		III	7521700	0.289189		III	7522200	0.132463
chrIV	4315900	0.635462		III	7277200	0.452749		III	12279100	0.379805		III	8645600	0.167527		III	7563000	0.322149		III	7559500	0.603823
chrIV	4357000	0.88107		III	7336900	0.668118		III	12312500	0.169033		III	8695800	0.452083		III	7609400	0.376445		III	7616900	0.680647
chrIV	4405800	0.906408		III	7378500	0.282778		III	12336900	0.198275		III	8747000	0.823727		III	7655000	0.908399		III	7655100	0.9503
chrIV	4446400	0.869685		III	7499200	0.401677		III	12370100	0.769257		III	8789900	0.842217		III	7713200	0.443303		III	7693700	0.284779
chrIV	4475600	0.35926		III	7522300	0.748651		III	12408900	0.217934		III	8851400	0.405649		III	7777700	0.42891		III	7721300	0.558285
chrIV	4511700	0.434196		III	7552600	0.648117		III	12431100	0.352736		III	8886700	0.708763		III	7826600	0.16416		III	7776600	0.235594
chrIV	4590900	0.358034		III	7569300	0.786058		III	12454100	0.689141		III	8935700	0.171195		III	7849300	0.359601		III	7817000	0.200462
chrIV	4653900	0.90575		III	7608200	0.603669		III	12527800	0.747826		III	8957500	0.373947		III	7962300	0.653855		III	7846400	0.393809
chrIV	4755600	0.480314		III	7661100	0.947711		III	12557100	0.253944		III	8988800	0.368607		III	7980400	0.653855		III	7871900	0.195241
chrIV	4780800	0.293162		III	7714100	0.828899		III	12576900	0.507995		III	9047100	0.247401		III	8006500	0.687727		III	7919300	0.568688
chrIV	4808800	0.262157		III	7764200	0.330946		III	12612300	0.829568		III	9068900	0.554587		III	8023800	0.422657		III	7958600	0.321177
chrIV	4886100	0.200643		III	7787200	0.392535		III	12653800	0.230202		III	9113500	0.786786		III	8079000	0.200043		III	7981100	0.646183
chrIV	4934700	0.251822		III	7823700	0.422414		III	12689100	0.682455		III	9178800	0.804908		III	8100300	0.63974		III	8023700	0.636231
chrIV	4961000	0.195253		III	7853800	0.76467		III	12712500	0.589836		III	9243000	0.798445		III	8130300	0.49503		III	8104800	0.553536
chrIV	5076900	0.719477		III	7966900	0.780885		III	12744200	0.458989		III	9278200	0.275917		III	8164500	0.571498		III	8130300	0.462553
chrIV	5169100	0.678065		III	8006900	0.589169		III	12789400	0.158249		III	9318300	0.420816		III	8217700	0.139447		III	8156400	0.381296
chrIV	5247100	0.745523		III	8074100	0.196747		III	12808700	0.443246		III	9345600	0.25343		III	8253700	0.594599		III	8175000	0.516346
chrIV	5354000	0.840803		III	8098300	0.675732		III	12871900	0.423352		III	9369600	0.5406		III	8277400	0.226288		III	8238400	0.378411
chrIV	5370300	0.64332		III	8127000	0.857077		III	12899700	0.509999		III	9429200	0.2483		III	8306100	0.611539		III	8256900	0.479611
chrIV	5393300	0.541829		III	8164900	0.512359		III	12926100	0.329872		III	9455600	0.762616		III	8339400	0.561218		III	8277900	0.310097
chrIV	5483300	0.477111		III	8218300	0.220412		III	12941400	0.336615		III	9485500	0.661033		III	8366100	0.820789		III	8306000	0.652899
chrIV	5505600	0.570517		III	8246700	0.666616		III	12973400	0.76763		III	9506000	0.648015		III	8422600	0.669874		III	8370400	0.837288
chrIV	5550800	0.295826		III	8278200	0.315591		III	13006300	0.509441		III	9539700	0.624051		III	8452800	0.284154		III	8422400	0.797009
chrIV	5599100	0.658632		III	8306500	0.522608		III	13066300	0.681125		III	9566800	0.403957		III	8487400	0.780827		III	8457900	0.357194
chrIV	5656400	0.586568		III	8368300	0.762451		III	13086800	0.826495		III	9601900	0.684894		III	8529000	0.501147		III	8487200	0.618567
chrIV	5753500	0.808769		III	8422800	0.494191		III	13122700	0.56736		III	9625200	0.715424		III	8555400	0.407023		III	8528800	0.506662
chrIV	5817100	0.199992		III	8448200	0.522213		III	13166600	0.586616		III	9675200	0.485143		III	8603400	0.717439		III	8554200	0.662747
chrIV	5854700	0.748831		III	8487600	0.760352		III	13203200	0.649246		III	9695300	0.682681		III	8628000	0.31726		III	8595400	0.725447
chrIV	5934100	0.447198		III	8528800	0.412556		III	13228500	0.557845		III	9739900	0.714157		III	8695900	0.400441		III	8618500	0.3811
chrIV	5969000	0.724631		III	8551300	0.572977		III	13259500	0.797559		III	9777000	0.195673		III	8747000	0.237511		III	8645300	0.138079
chrIV	6097900	0.58614		III	8603400	0.787407		III	13312600	0.516183		III	9866400	0.437802		III	8766800	0.598665		III	8695900	0.602247
chrIV	6208200	0.478904		III	8687600	0.643192		III	13340500	0.320581		III	9913400	0.448156		III	8794200	0.706101		III	8747000	0.808749
chrIV	6290300	0.382558		III	8747000	0.721776		III	13387200	0.379604		III	9949700	0.202985		III	8851600	0.587045		III	8791900	0.701898
chrIV	6326700	0.444633		III	8764200	0.784987		III	13431100	0.672064		III	9986800	0.768808		III	8902600	0.578064		III	8812600	0.394769
chrIV	6377200	0.448356		III	8794200	0.835634		III	13463100	0.636948		III	10056500	0.25566		III	8957100	0.357024		III	8852200	0.437863
chrIV	6409100	0.138637		III	8851600	0.659377		III	13496800	0.430104		III	10074100	0.194743		III	8988600	0.429048		III	8887400	0.647012
chrIV	6472700	0.680099		III	8902700	0.656085		III	13535100	0.530985		III	10098800	0.445978		III	9003800	0.3456		III	8952000	0.581087
chrIV	6523900	0.47507		III	8957300	0.547633		III	13562100	0.561456		III	10164100	0.431233		III	9047200	0.242451		III	8980700	0.171128
chrIV	6555700	0.192736		III	8999900	0.507302		III	13636700	0.522323		III	10194900	0.703083		III	9069100	0.469741		III	9005900	0.200825
chrIV	6576900	0.400837		III	9047300	0.591792		III	13660600	0.721985		III	10231200	0.49242		III	9094100	0.338834		III	9045900	0.251175
chrIV	6603700	0.432557		III	9090700	0.184923		III	13715900	0.689456		III	10259300	0.648285		III	9115000	0.448685		III	9069100	0.437401
chrIV	6647200	0.447808		III	9113400	0.764755		III	13765200	0.289289		III	10291300	0.218563		III	9178600	0.642757		III	9094200	0.476124
chrIV	6753000	0.222838		III	9178500	0.836364		IV	121700	0.523055		III	10325000	0.303532		III	9225500	0.576692		III	9115300	0.447396
chrIV	6790700	0.630986		III	9229000	0.859769		IV	150000	0.239878		III	10349800	0.487449		III	9246900	0.699008		III	9137600	0.574718
chrIV	6845900	0.3182		III	9243100	0.859769		IV	175800	0.692183		III	10373100	0.4674		III	9324900	0.307297		III	9178800	0.63595
chrIV	6912700	0.773547		III	9278600	0.3464		IV	205500	0.266174		III	10398800	0.375654		III	9346900	0.490802		III	9225400	0.289943
chrIV	6988700	0.598981		III	9318300	0.428296		IV	249800	0.287845		III	10433600	0.516687		III	9369000	0.240527		III	9251600	0.575314
chrIV	7019700	0.375646		III	9343300	0.658341		IV	273800	0.518712		III	10458500	0.257789		III	9394500	0.671071		III	9299400	0.0931363
chrIV	7047800	0.320024		III	9369200	0.543647		IV	338600	0.241526		III	10484700	0.530789		III	9408100	0.285594		III	9318400	0.516423
chrIV	7064300	0.191788		III	9455400	0.765852		IV	388300	0.633372		III	10563500	0.24372		III	9443700	0.733573		III	9345600	0.59777
chrIV	7087200	0.432316		III	9485700	0.727626		IV	425300	0.311057		III	10590400	0.735432		III	9489000	0.429489		III	9370500	0.194633
chrIV	7147500	0.531507		III	9507600	0.727626		IV	444000	0.311057		III	10629200	0.410423		III	9507200	0.411386		III	9423100	0.396826
chrIV	7166500	0.626113		III	9540700	0.614652		IV	524400	0.270475		III	10666000	0.62853		III	9544800	0.182825		III	9447300	0.455891
chrIV	7235900	0.740648		III	9567500	0.314612		IV	562100	0.776718		III	10726500	0.487474		III	9602100	0.262879		III	9485600	0.549403
chrIV	7313300	0.45905		III	9602100	0.672499		IV	627900	0.271636		III	10748300	0.770705		III	9626300	0.680402		III	9507800	0.549403
chrIV	7335500	0.594171		III	9625100	0.747544		IV	658300	0.489349		III	10777300	0.421582		III	9672800	0.209344		III	9538700	0.238006
chrIV	7387900	0.922786		III	9673900	0.442049		IV	677400	0.616688		III	10822800	0.807766		III	9695500	0.42546		III	9601600	0.301374
chrIV	7486100	0.817085		III	9695300	0.607354		IV	710800	0.248099		III	10873600	0.276403		III	9737200	0.608116		III	9626400	0.720415
chrIV	7520000	0.310542		III	9739800	0.51532		IV	731700	0.581615		III	10909500	0.75814		III	9774900	0.187476		III	9674500	0.246779
chrIV	7556400	0.528908		III	9775000	0.492845		IV	778100	0.674842		III	10956900	0.228963		III	9795900	0.123944		III	9718400	0.515656
chrIV	7580300	0.584274		III	9866700	0.527572		IV	820500	0.404555		III	10979900	0.181488		III	9820600	0.519107		III	9753800	0.0176819
chrIV	7632600	0.369077		III	9913400	0.501509		IV	835100	0.713299		III	11012500	0.489187		III	9863000	0.524708		III	9820900	0.419719
chrIV	7657200	0.422081		III	9966000	0.479256		IV	880100	0.497938		III	11035600	0.627973		III	9913500	0.379374		III	9841900	0.345408
chrIV	7722400	0.316222		III	9990800	0.652471		IV	901800	0.740663		III	11069700	0.512457		III	9965900	0.343197		III	9862600	0.387236
chrIV	7791900	0.845217		III	10056400	0.276791		IV	947000	0.356132		III	11127900	0.535452		III	9990900	0.448631		III	9916100	0.346259
chrIV	7842100	0.593862		III	10074100	0.41774		IV	986800	0.199582		III	11147800	0.691165		III	10058900	0.620788		III	9933900	0.125808
chrIV	7906800	0.845312		III	10098700	0.7596		IV	1019300	0.309965		III	11174400	0.199339		III	10096400	0.328599		III	9965900	0.462356
chrIV	7924600	0.508165		III	10114300	0.694957		IV	1053200	0.390131		III	11215700	0.271687		III	10123500	0.111068		III	9991000	0.652668
chrIV	7948100	0.506466		III	10164200	0.539074		IV	1074300	0.529759		III	11234400	0.172243		III	10143800	0.270617		III	10012700	0.414392
chrIV	8008900	0.874548		III	10194500	0.59492		IV	1096900	0.163666		III	11254500	0.373517		III	10169800	0.201838		III	10047900	0.202989
chrIV	8059700	0.654946		III	10231300	0.276497		IV	1118700	0.314516		III	11273300	0.756777		III	10199000	0.626984		III	10067800	0.586685
chrIV	8092100	0.504265		III	10262300	0.349856		IV	1175100	0.687937		III	11304300	0.218433		III	10231100	0.380084		III	10099600	0.679425
chrIV	8122300	0.280201		III	10325100	0.353065		IV	1206600	0.714456		III	11326800	0.355031		III	10259300	0.323155		III	10143800	0.262854
chrIV	8142600	0.512824		III	10350100	0.542003		IV	1230800	0.274852		III	11351200	0.809005		III	10292600	0.2078		III	10164100	0.548396
chrIV	8182200	0.409203		III	10373300	0.398895		IV	1276000	0.774476		III	11381300	0.309707		III	10316600	0.323417		III	10204400	0.492699
chrIV	8228900	0.376895		III	10401700	0.792136		IV	1305200	0.349237		III	11401600	0.621871		III	10350000	0.269952		III	10231100	0.646176
chrIV	8294200	0.499257		III	10438300	0.485087		IV	1341800	0.427534		III	11448600	0.837466		III	10373400	0.480508		III	10259500	0.272281
chrIV	8333000	0.913198		III	10461000	0.672554		IV	1363000	0.566828		III	11481900	0.8441		III	10401000	0.537313		III	10293700	0.333809
chrIV	8404600	0.535956		III	10502800	0.40816		IV	1442900	0.466206		III	11515600	0.338552		III	10436600	0.335721		III	10344800	0.691765
chrIV	8429100	0.575925		III	10560100	0.220986		IV	1484900	0.658954		III	11555600	0.809365		III	10475400	0.590052		III	10373600	0.49056
chrIV	8507600	0.55352		III	10590400	0.512522		IV	1568100	0.383205		III	11588000	0.488998		III	10504600	0.383504		III	10399000	0.479292
chrIV	8538600	0.0803068		III	10628700	0.339657		IV	1611500	0.532512		III	11624400	0.450868		III	10560100	0.655703		III	10437000	0.260627
chrIV	8612700	0.877778		III	10660600	0.68948		IV	1640500	0.673522		III	11659600	0.463567		III	10590700	0.539722		III	10475400	0.371476
chrIV	8629500	0.822747		III	10722400	0.346196		IV	1667800	0.476505		III	11679000	0.155252		III	10628100	0.500312		III	10490500	0.414722
chrIV	8697000	0.612535		III	10760000	0.602575		IV	1705000	0.489402		III	11751400	0.619484		III	10666300	0.602949		III	10533700	0.192416
chrIV	8726100	0.378875		III	10777400	0.526975		IV	1751900	0.724446		III	11787700	0.642066		III	10729200	0.516288		III	10560200	0.787597
chrIV	8784700	0.909118		III	10822500	0.851244		IV	1806000	0.668496		III	11805500	0.274225		III	10760900	0.507712		III	10627600	0.727216
chrIV	8820000	0.471159		III	10873400	0.280443		IV	1838000	0.713655		III	11830700	0.686244		III	10829000	0.708963		III	10663700	0.579873
chrIV	8891400	0.287802		III	10909900	0.594888		IV	1898000	0.859952		III	11859800	0.756318		III	10877900	0.27815		III	10729700	0.560446
chrIV	8919200	0.293109		III	10960200	0.225832		IV	1972100	0.651283		III	11933800	0.811244		III	10910100	0.387394		III	10757200	0.447405
chrIV	8965900	0.426506		III	10977900	0.476048		IV	2004900	0.547506		III	11959100	0.567189		III	10935300	0.146506		III	10782500	0.452334
chrIV	9012500	0.229486		III	11007000	0.586133		IV	2040600	0.217676		III	12006200	0.547528		III	10956500	0.15686		III	10829600	0.688764
chrIV	9037400	0.402055		III	11035600	0.625465		IV	2060800	0.347973		III	12031600	0.487048		III	10980000	0.0837757		III	10857300	0.141014
chrIV	9064700	0.0853071		III	11069800	0.742928		IV	2168500	0.788625		III	12068100	0.283293		III	11043600	0.367653		III	10877900	0.355164
chrIV	9105100	0.552307		III	11141900	0.736076		IV	2186700	0.788625		III	12102600	0.617432		III	11069600	0.260045		III	10910400	0.660771
chrIV	9123800	0.72859		III	11172900	0.264165		IV	2217000	0.93213		III	12147100	0.843358		III	11093600	0.224569		III	10955700	0.262717
chrIV	9193400	0.451864		III	11215500	0.203987		IV	2298600	0.516643		III	12184700	0.511352		III	11141900	0.626886		III	10998800	0.129983
chrIV	9218300	0.761452		III	11234500	0.584647		IV	2317500	0.795734		III	12286800	0.186536		III	11210000	0.433849		III	11073200	0.390517
chrIV	9266000	0.90758		III	11284000	0.500277		IV	2362500	0.405905		III	12310300	0.242875		III	11235100	0.474826		III	11138900	0.765531
chrIV	9324700	0.153015		III	11304500	0.421089		IV	2385800	0.589793		III	12331400	0.367981		III	11287800	0.475954		III	11171400	0.417521
chrIV	9343700	0.380116		III	11326700	0.346056		IV	2420500	0.617934		III	12370400	0.719061		III	11351900	0.643094		III	11211000	0.569076
chrIV	9374800	0.244907		III	11351200	0.736143		IV	2452100	0.170774		III	12409100	0.592225		III	11381000	0.550609		III	11254400	0.645517
chrIV	9400200	0.336491		III	11381300	0.307779		IV	2524800	0.64406		III	12433300	0.354071		III	11402000	0.417871		III	11280200	0.187449
chrIV	9444500	0.848183		III	11402000	0.707684		IV	2605300	0.85816		III	12454600	0.661398		III	11448400	0.727188		III	11330500	0.143361
chrIV	9514700	0.590437		III	11448600	0.746504		IV	2636400	0.112257		III	12576700	0.381602		III	11481600	0.71436		III	11356000	0.639258
chrIV	9533200	0.672776		III	11482000	0.815684		IV	2652800	0.141842		III	12611900	0.796799		III	11515400	0.247124		III	11402000	0.630703
chrIV	9608800	0.56867		III	11515600	0.505234		IV	2680400	0.577251		III	12655100	0.44055		III	11559100	0.59821		III	11455200	0.747552
chrIV	9641700	0.154955		III	11557800	0.755469		IV	2711700	0.436619		III	12689600	0.663355		III	11588300	0.242319		III	11489800	0.63655
chrIV	9667600	0.657098		III	11605800	0.49765		IV	2735500	0.520556		III	12712400	0.608038		III	11623600	0.463843		III	11516300	0.311122
chrIV	9773400	0.936394		III	11624200	0.57647		IV	2778000	0.423296		III	12744300	0.576199		III	11659800	0.249675		III	11565000	0.625381
chrIV	9803600	0.113965		III	11659100	0.302207		IV	2798800	0.518889		III	12789300	0.241709		III	11679300	0.27853		III	11624200	0.70216
chrIV	9855600	0.515708		III	11679100	0.329789		IV	2868800	0.197312		III	12808400	0.629856		III	11713800	0.326295		III	11648400	0.4607
chrIV	9874000	0.439042		III	11751500	0.630383		IV	2900000	0.55261		III	12825400	0.629856		III	11748400	0.575262		III	11679300	0.174849
chrIV	9899200	0.494821		III	11797900	0.587595		IV	2995700	0.695427		III	12871800	0.83789		III	11797600	0.437523		III	11705100	0.383476
chrIV	9926900	0.137036		III	11829700	0.727449		IV	3060500	0.325687		III	12895200	0.701615		III	11823400	0.522658		III	11751500	0.467328
chrIV	9947200	0.467351		III	11859600	0.712287		IV	3100700	0.394129		III	12942200	0.540512		III	11859900	0.629207		III	11829900	0.620653
chrIV	9983600	0.430021		III	11934000	0.764254		IV	3160700	0.888659		III	12973500	0.771038		III	11911100	0.440453		III	11860700	0.719459
chrIV	10003600	0.681636		III	11959000	0.540626		IV	3197700	0.240243		III	13006300	0.561272		III	11933500	0.63134		III	11906800	0.322664
chrIV	10062400	0.189151		III	12031900	0.630584		IV	3237200	0.915169		III	13066500	0.92366		III	11959300	0.652243		III	11934400	0.654139
chrIV	10087200	0.495267		III	12067800	0.368495		IV	3275400	0.73567		III	13086700	0.79257		III	12001100	0.43505		III	12001100	0.198745
chrIV	10130500	0.322571		III	12102400	0.463796		IV	3334700	0.863728		III	13122900	0.754911		III	12032000	0.522852		III	12031600	0.602974
chrIV	10188000	0.709083		III	12147600	0.870419		IV	3389600	0.450572		III	13203100	0.845808		III	12067700	0.319016		III	12062800	0.0976958
chrIV	10252100	0.701038		III	12184600	0.462122		IV	3436500	0.28184		III	13232700	0.578577		III	12100300	0.607336		III	12101400	0.726682
chrIV	10284800	0.519088		III	12229200	0.839958		IV	3483100	0.241973		III	13259400	0.703316		III	12147400	0.687362		III	12140900	0.551636
chrIV	10368100	0.549488		III	12251100	0.723374		IV	3518200	0.696034		III	13312600	0.240103		III	12277700	0.279638		III	12195900	0.495884
chrIV	10421100	0.547968		III	12279100	0.574912		IV	3533800	0.501713		III	13338100	0.49633		III	12309200	0.228691		III	12235700	0.59394
chrIV	10479400	0.199397		III	12309000	0.221988		IV	3552900	0.53224		III	13364800	0.136061		III	12336200	0.242093		III	12284200	0.285502
chrIV	10500600	0.506597		III	12331200	0.738152		IV	3580600	0.374648		III	13386800	0.252449		III	12370000	0.608512		III	12309400	0.403726
chrIV	10552800	0.573845		III	12370100	0.693152		IV	3601600	0.474114		III	13436800	0.664597		III	12399800	0.438106		III	12336100	0.386451
chrIV	10574400	0.726095		III	12406600	0.43755		IV	3632600	0.29528		III	13463000	0.55024		III	12430600	0.287623		III	12380100	0.345142
chrIV	10615800	0.288804		III	12433500	0.273681		IV	3651500	0.688186		III	13497700	0.595038		III	12454200	0.684945		III	12398600	0.521902
chrIV	10663200	0.599743		III	12454800	0.705869		IV	3683100	0.399185		III	13536500	0.465016		III	12529900	0.23909		III	12430900	0.29755
chrIV	10699200	0.380873		III	12486800	0.592169		IV	3770000	0.718881		III	13562400	0.641734		III	12575800	0.780342		III	12449000	0.745185
chrIV	10715800	0.18488		III	12527400	0.557003		IV	3830000	0.825553		III	13637000	0.574271		III	12613900	0.701055		III	12471600	0.878354
chrIV	10768000	0.52938		III	12576900	0.894741		IV	3914500	0.294906		III	13661000	0.737322		III	12660300	0.438333		III	12531100	0.22458
chrIV	10820900	0.928862		III	12614200	0.80578		IV	3939900	0.166116		III	13710200	0.640673		III	12688200	0.607323		III	12576700	0.883215
chrIV	10869800	0.475752		III	12653500	0.273591		IV	3961300	0.19763		III	13761400	0.249135		III	12712400	0.59911		III	12613800	0.699983
chrIV	10935800	0.790455		III	12689600	0.717854		IV	3986100	0.480099		IV	58700	0.807096		III	12744200	0.590212		III	12660200	0.389203
chrIV	10971500	0.433175		III	12712500	0.63533		IV	4023200	0.592642		IV	118000	0.649286		III	12790300	0.127631		III	12688100	0.559086
chrIV	11028100	0.925458		III	12744000	0.630441		IV	4050700	0.310159		IV	154100	0.604457		III	12825400	0.460079		III	12712500	0.461469
chrIV	11083700	0.158666		III	12789100	0.166109		IV	4078200	0.585418		IV	175900	0.738305		III	12870500	0.342786		III	12746100	0.521804
chrIV	11115500	0.919319		III	12871800	0.436662		IV	4109100	0.184096		IV	205400	0.299192		III	12895100	0.709735		III	12790100	0.631078
chrIV	11150200	0.342549		III	12895100	0.704476		IV	4158300	0.182483		IV	249800	0.401121		III	12926300	0.573774		III	12854800	0.06151
chrIV	11166100	0.413032		III	12925800	0.532311		IV	4180500	0.825237		IV	273800	0.52875		III	12941400	0.573774		III	12895200	0.533183
chrIV	11209300	0.350471		III	12941800	0.56547		IV	4243300	0.381205		IV	338400	0.331893		III	12973400	0.691233		III	12917900	0.623455
chrIV	11320700	0.898256		III	12974000	0.784352		IV	4268000	0.462946		IV	381900	0.84044		III	13006200	0.368062		III	12942200	0.316222
chrIV	11341100	0.825894		III	13001400	0.5079		IV	4312900	0.59368		IV	421200	0.174504		III	13063000	0.818633		III	12973300	0.443273
chrIV	11405100	0.819143		III	13063600	0.919379		IV	4387200	0.688577		IV	443700	0.339256		III	13117700	0.368089		III	13006300	0.484575
chrIV	11487700	0.696881		III	13087900	0.758273		IV	4403800	0.898206		IV	525400	0.2219		III	13178800	0.270793		III	13061400	0.673113
chrIV	11524300	0.656683		III	13118100	0.679748		IV	4445100	0.951627		IV	558500	0.834673		III	13203000	0.461878		III	13086600	0.77878
chrIV	11564600	0.434285		III	13149600	0.29107		IV	4475000	0.307786		IV	608800	0.13816		III	13232300	0.58614		III	13123600	0.649806
chrIV	11593900	0.591717		III	13203200	0.859933		IV	4515000	0.544584		IV	633200	0.280011		III	13255500	0.325436		III	13179100	0.431722
chrIV	11645700	0.574584		III	13232600	0.52461		IV	4543800	0.34216		IV	676600	0.546072		III	13314500	0.218204		III	13203100	0.337843
chrIV	11691900	0.649802		III	13258400	0.790397		IV	4594500	0.550135		IV	710800	0.240467		III	13340500	0.239446		III	13232600	0.621369
chrIV	11717300	0.609449		III	13289200	0.282412		IV	4651000	0.904319		IV	735200	0.741942		III	13388100	0.392801		III	13255600	0.38371
chrIV	11743600	0.604944		III	13312600	0.443032		IV	4715600	0.423318		IV	780600	0.579999		III	13437100	0.538549		III	13340600	0.238152
chrIV	11828300	0.497728		III	13340300	0.496774		IV	4755400	0.348409		IV	819700	0.444749		III	13463300	0.383031		III	13364600	0.39053
chrIV	11865800	0.389271		III	13387300	0.528433		IV	4773500	0.570814		IV	842300	0.56525		III	13496900	0.317584		III	13437200	0.20815
chrIV	11923400	0.262312		III	13431000	0.746078		IV	4806700	0.30704		IV	880000	0.360723		III	13540000	0.500137		III	13469600	0.326013
chrIV	11966900	0.673557		III	13463300	0.729487		IV	4913700	0.407612		IV	901800	0.783377		III	13562600	0.424003		III	13496700	0.55144
chrIV	12044200	0.875485		III	13494500	0.484375		IV	4938800	0.298435		IV	946700	0.667094		III	13620800	0.944767		III	13540100	0.602719
chrIV	12079300	0.104838		III	13534200	0.589011		IV	4967900	0.123986		IV	986400	0.277906		III	13636700	0.670866		III	13563100	0.626829
chrIV	12129700	0.695764		III	13562600	0.615772		IV	4999800	0.710747		IV	1074100	0.482242		III	13662300	0.354374		III	13636100	0.861474
chrIV	12157500	0.318599		III	13637300	0.699367		IV	5070800	0.895161		IV	1120300	0.559077		III	13687000	0.139135		III	13666200	0.31667
chrIV	12178400	0.661625		III	13663400	0.648275		IV	5168800	0.634892		IV	1160700	0.632708		III	13720500	0.663065		III	13709700	0.757502
chrIV	12208400	0.506521		III	13711100	0.652425		IV	5228000	0.0627279		IV	1180900	0.353876		IV	34600	0.931507		III	13726100	0.757502
chrIV	12274700	0.718093		III	13768300	0.440456		IV	5252300	0.90065		IV	1203400	0.734692		IV	86800	0.351189		III	13759300	0.528388
chrIV	12331100	0.269606		IV	60100	1		IV	5318300	0.469054		IV	1230800	0.296205		IV	121400	0.478594		IV	10900	0.791066
chrIV	12373700	0.510532		IV	86900	0.205388		IV	5356600	0.229193		IV	1275100	0.71862		IV	175500	0.513184		IV	34700	1
chrIV	12398600	0.586578		IV	121600	0.80463		IV	5392400	0.57121		IV	1305300	0.4719		IV	206500	0.430201		IV	52400	0.734587
chrIV	12471900	0.683224		IV	154700	0.436114		IV	5505600	0.82821		IV	1362400	0.908792		IV	249600	0.351781		IV	96700	0.402567
chrIV	12545600	0.929352		IV	175600	0.71172		IV	5538000	0.526324		IV	1443000	0.460809		IV	275900	0.512611		IV	121400	0.517846
chrIV	12617100	0.800522		IV	205400	0.378789		IV	5552700	0.526324		IV	1484600	0.495352		IV	342000	0.252268		IV	155200	0.705091
chrIV	12651200	0.36659		IV	249900	0.327549		IV	5595300	0.650207		IV	1568700	0.760338		IV	383700	0.768114		IV	176100	0.668279
chrIV	12686600	0.417558		IV	273800	0.565848		IV	5646900	0.343117		IV	1611600	0.545008		IV	423300	0.235561		IV	249400	0.251685
chrIV	12813700	0.562117		IV	303100	0.158916		IV	5666900	0.687001		IV	1640500	0.629204		IV	444400	0.467591		IV	272900	0.533917
chrIV	12831700	0.702796		IV	388200	0.847152		IV	5748900	0.659022		IV	1667900	0.519523		IV	480100	0.189866		IV	341900	0.453675
chrIV	12852400	0.490312		IV	425300	0.262325		IV	5791000	0.301886		IV	1702600	0.592838		IV	498500	0.313002		IV	380800	0.786964
chrIV	12927800	0.288231		IV	444100	0.425339		IV	5815200	0.573697		IV	1723800	0.518704		IV	522800	0.517472		IV	443700	0.466924
chrIV	12999900	0.18279		IV	478300	0.144505		IV	5852700	0.704095		IV	1752700	0.552207		IV	559500	0.459721		IV	480000	0.183204
chrIV	13030100	0.883562		IV	531400	0.498243		IV	5881400	0.371493		IV	1806300	0.550361		IV	579500	0.68105		IV	499100	0.408981
chrIV	13093900	0.290845		IV	558700	0.78157		IV	5943100	0.479763		IV	1837800	0.687509		IV	608900	0.0721171		IV	523100	0.292341
chrIV	13120800	0.494762		IV	631300	0.273213		IV	5969700	0.610827		IV	1867200	0.151125		IV	658400	0.407346		IV	559500	0.756558
chrIV	13154700	0.156667		IV	655100	0.447128		IV	6002400	0.529607		IV	1898500	0.868008		IV	680700	0.461613		IV	584000	0.555355
chrIV	13183200	0.337963		IV	677300	0.592432		IV	6098200	0.53045		IV	1968600	0.707244		IV	735200	0.450208		IV	608700	0.240681
chrIV	13240200	0.595419		IV	710700	0.252639		IV	6137400	0.461475		IV	2009200	0.835579		IV	778100	0.644174		IV	633900	0.539514
chrIV	13297600	0.58176		IV	731900	0.761561		IV	6192400	0.271327		IV	2041600	0.293881		IV	819700	0.558261		IV	671400	0.622821
chrIV	13349200	0.27384		IV	779300	0.615814		IV	6287700	0.355876		IV	2060700	0.371134		IV	837500	0.672473		IV	710600	0.270732
chrIV	13375100	0.888242		IV	820500	0.554133		IV	6323600	0.642005		IV	2118600	0.1322		IV	880100	0.626877		IV	735000	0.275062
chrIV	13392800	0.678043		IV	842300	0.578403		IV	6379300	0.158986		IV	2144400	0.542463		IV	946600	0.229349		IV	780100	0.511254
chrIV	13414700	0.571893		IV	901900	0.723054		IV	6403500	0.251027		IV	2168300	0.735207		IV	983900	0.181268		IV	819600	0.429578
chrIV	13454600	0.268436		IV	948900	0.62805		IV	6438200	0.289961		IV	2186700	0.501469		IV	1019400	0.244619		IV	841900	0.680119
chrIV	13503200	0.658792		IV	986500	0.321935		IV	6468600	0.801703		IV	2216900	0.947755		IV	1053300	0.371093		IV	927300	0.204283
chrIV	13536600	0.443358		IV	1019300	0.417506		IV	6554400	0.230994		IV	2291700	0.35701		IV	1118500	0.555215		IV	963900	0.641559
chrIV	13587300	0.152579		IV	1077000	0.40122		IV	6577200	0.321796		IV	2317900	0.780795		IV	1160500	0.581259		IV	1020000	0.44724
chrIV	13656400	0.170084		IV	1120200	0.606466		IV	6602500	0.666064		IV	2362600	0.35711		IV	1175500	0.577055		IV	1074400	0.403062
chrIV	13699000	0.572997		IV	1159300	0.713345		IV	6647600	0.451458		IV	2385500	0.542046		IV	1203500	0.264531		IV	1118900	0.250693
chrIV	13717600	0.802238		IV	1175700	0.713345		IV	6718900	0.79408		IV	2420500	0.642719		IV	1227000	0.399306		IV	1161100	0.567354
chrIV	13779300	0.823831		IV	1199500	0.686467		IV	6754700	0.395457		IV	2452100	0.256636		IV	1276600	0.693151		IV	1203300	0.663594
chrIV	13888200	0.912264		IV	1230900	0.185033		IV	6791500	0.655972		IV	2490100	0.169197		IV	1305300	0.384348		IV	1227000	0.601178
chrIV	13945300	0.414369		IV	1275900	0.779316		IV	6903100	0.46296		IV	2528400	0.748912		IV	1341700	0.448199		IV	1275700	0.707172
chrIV	14033300	0.95265		IV	1305400	0.332173		IV	6989100	0.438774		IV	2557500	0.359525		IV	1361600	0.601552		IV	1305100	0.660115
chrIV	14071600	0.282429		IV	1322100	0.785776		IV	7020400	0.410104		IV	2598100	0.910797		IV	1389900	0.687817		IV	1347100	0.600576
chrIV	14107300	0.244474		IV	1341900	0.455714		IV	7046800	0.243254		IV	2652900	0.332648		IV	1407900	0.687817		IV	1361600	0.31868
chrIV	14192100	0.606382		IV	1362200	0.459344		IV	7066700	0.508759		IV	2681600	0.591316		IV	1443100	0.325833		IV	1389600	0.645692
chrIV	14220600	0.122055		IV	1389800	0.614854		IV	7100300	0.186522		IV	2712300	0.577561		IV	1484700	0.645345		IV	1407700	0.639325
chrIV	14297500	0.604633		IV	1484700	0.736039		IV	7144200	0.326475		IV	2775900	0.300785		IV	1501800	0.427363		IV	1450000	0.629033
chrIV	14325700	0.283801		IV	1502200	0.443698		IV	7168600	0.694876		IV	2798900	0.571424		IV	1521200	0.382719		IV	1484800	0.427264
chrIV	14454400	0.708096		IV	1523200	0.491429		IV	7210800	0.137038		IV	2841300	0.18258		IV	1566500	0.296299		IV	1523300	0.18297
chrIV	14497100	0.396195		IV	1541500	0.192228		IV	7234200	0.735468		IV	2869000	0.381976		IV	1601400	0.476711		IV	1566600	0.544415
chrIV	14560800	0.191735		IV	1568700	0.463453		IV	7293800	0.285983		IV	2929200	0.770034		IV	1642300	0.368643		IV	1588500	0.194054
chrIV	14594000	0.119544		IV	1611500	0.335438		IV	7316300	0.306169		IV	2996000	0.68975		IV	1667900	0.100205		IV	1612400	0.372551
chrIV	14624200	0.489334		IV	1642100	0.667214		IV	7336100	0.496452		IV	3021600	0.488462		IV	1701900	0.577643		IV	1642400	0.582273
chrIV	14661600	0.480616		IV	1667900	0.486575		IV	7370800	0.763129		IV	3066000	0.210773		IV	1805200	0.520687		IV	1677100	0.197227
chrIV	14763400	0.893102		IV	1701600	0.733676		IV	7390600	0.910407		IV	3099000	0.55515		IV	1838500	0.661306		IV	1701200	0.527335
chrIV	14792900	0.746758		IV	1748500	0.780055		IV	7454100	0.206215		IV	3159300	0.929502		IV	1901200	0.593132		IV	1725300	0.295851
chrIV	14826900	0.588305		IV	1806100	0.46121		IV	7486100	0.847335		IV	3197800	0.315786		IV	1925500	0.340439		IV	1757800	0.439514
chrIV	14871300	0.522394		IV	1838100	0.703196		IV	7550400	0.252432		IV	3237200	0.890812		IV	1972200	0.571313		IV	1806200	0.320054
chrIV	14905800	0.227178		IV	1898100	0.818627		IV	7575900	0.661229		IV	3275300	0.534077		IV	2004800	0.43836		IV	1845700	0.45382
chrIV	14956500	0.447745		IV	1971800	0.664185		IV	7632900	0.514312		IV	3332900	0.524152		IV	2062500	0.346591		IV	1897700	0.823655
chrIV	15035800	0.808342		IV	2009000	0.766128		IV	7655500	0.639603		IV	3389800	0.361364		IV	2129300	0.476843		IV	1925100	0.340921
chrIV	15109200	0.441038		IV	2040700	0.242394		IV	7672200	0.383908		IV	3436400	0.478772		IV	2177700	0.657906		IV	1971800	0.594168
chrIV	15138400	0.576068		IV	2063000	0.324424		IV	7714000	0.176946		IV	3483100	0.398433		IV	2217100	0.854189		IV	2009700	0.682787
chrIV	15197800	0.10218		IV	2171600	0.759297		IV	7733000	0.624357		IV	3507400	0.528669		IV	2267400	0.13399		IV	2039600	0.446012
chrIV	15259000	0.350002		IV	2186800	0.759297		IV	7769800	0.265868		IV	3539700	0.430715		IV	2291600	0.634267		IV	2061300	0.281543
chrIV	15309700	0.590523		IV	2217400	0.910715		IV	7794800	0.830768		IV	3580800	0.423209		IV	2329400	0.54846		IV	2085900	0.318255
chrIV	15354900	0.29416		IV	2265000	0.289077		IV	7845900	0.720928		IV	3632300	0.297313		IV	2362900	0.248415		IV	2134400	0.588926
chrIV	15389400	0.159657		IV	2291900	0.423494		IV	7924400	0.469147		IV	3655900	0.658316		IV	2385400	0.488558		IV	2171800	0.389177
chrIV	15412900	0.324608		IV	2317400	0.766551		IV	7952900	0.537897		IV	3681800	0.292134		IV	2412600	0.44169		IV	2217500	0.893523
chrIV	15448600	0.339517		IV	2360700	0.442183		IV	8011300	0.851512		IV	3702500	0.509808		IV	2507400	0.654583		IV	2291600	0.711921
chrIV	15472400	0.693295		IV	2385400	0.966514		IV	8050700	0.419639		IV	3738000	0.813734		IV	2528700	0.50498		IV	2329400	0.551224
chrIV	15531100	0.417425		IV	2452100	0.249815		IV	8098200	0.523641		IV	3770400	0.7614		IV	2556900	0.489939		IV	2377600	0.527862
chrIV	15568800	0.515293		IV	2528300	0.641781		IV	8124500	0.679539		IV	3831000	0.909515		IV	2597400	0.801404		IV	2412800	0.436495
chrIV	15646900	0.800399		IV	2560800	0.296373		IV	8140800	0.679539		IV	3845400	0.797793		IV	2653000	0.234447		IV	2435400	0.606978
chrIV	15695500	0.0711221		IV	2652900	0.231588		IV	8173600	0.123109		IV	3914700	0.391035		IV	2682500	0.516145		IV	2491500	0.672393
chrIV	15746500	0.442465		IV	2681500	0.564533		IV	8201000	0.213881		IV	3962200	0.247283		IV	2710600	0.396393		IV	2528500	0.579123
chrIV	15789300	0.224741		IV	2711700	0.747382		IV	8231100	0.30745		IV	3985800	0.608275		IV	2778100	0.195987		IV	2582300	0.737635
chrIV	15853400	0.187056		IV	2729200	0.673844		IV	8290400	0.796026		IV	4022700	0.836496		IV	2798900	0.585432		IV	2619300	0.669181
chrIV	15895700	0.724852		IV	2777900	0.384664		IV	8331500	0.935372		IV	4050600	0.360854		IV	2841000	0.204585		IV	2710100	0.67735
chrIV	15947800	0.215946		IV	2798800	0.639313		IV	8395700	0.720725		IV	4082600	0.582246		IV	2868600	0.282108		IV	2797200	0.47523
chrIV	16024500	0.763583		IV	2869200	0.427068		IV	8429500	0.571195		IV	4108700	0.352073		IV	2899600	0.488473		IV	2843200	0.153022
chrIV	16129000	0.12731		IV	2899500	0.692925		IV	8507000	0.715144		IV	4155600	0.24181		IV	2925600	0.542527		IV	2869800	0.220753
chrIV	16170500	0.498398		IV	2929100	0.893701		IV	8552600	0.15218		IV	4180900	0.819614		IV	2990700	0.846379		IV	2995100	0.612738
chrIV	16257100	0.407236		IV	2995400	0.780487		IV	8608000	0.892089		IV	4243200	0.425348		IV	3021400	0.322019		IV	3049600	0.486084
chrIV	16283700	0.267282		IV	3024000	0.216162		IV	8626200	0.826852		IV	4267800	0.255291		IV	3065300	0.419674		IV	3069300	0.688432
chrIV	16399200	0.937117		IV	3060000	0.32842		IV	8691500	0.451722		IV	4290600	0.373199		IV	3100900	0.264519		IV	3084500	0.688432
chrIV	16494400	0.870235		IV	3100400	0.494279		IV	8724900	0.779394		IV	4318500	0.719119		IV	3151700	0.707237		IV	3169000	0.706505
chrIV	16770900	0.486589		IV	3153400	0.879949		IV	8782900	0.849984		IV	4337500	0.483138		IV	3168000	0.707237		IV	3197200	0.265641
chrIV	16863200	0.63333		IV	3197700	0.367313		IV	8816400	0.724653		IV	4386300	0.498289		IV	3197500	0.320016		IV	3232900	0.652306
chrIV	16953300	0.4411		IV	3226400	0.868049		IV	8842500	0.568718		IV	4449200	0.825017		IV	3233300	0.743914		IV	3275100	0.471208
chrIV	16992000	0.196453		IV	3280700	0.784318		IV	8875500	0.608601		IV	4478500	0.267152		IV	3275100	0.251735		IV	3299600	0.387172
chrIV	17011200	0.253655		IV	3329100	0.579311		IV	8927000	0.492134		IV	4515400	0.481289		IV	3299600	0.58383		IV	3348600	0.286107
chrIV	17089100	0.771615		IV	3372900	0.612964		IV	8967700	0.28388		IV	4543700	0.339552		IV	3332900	0.281591		IV	3371600	0.617286
chrIV	17120600	0.439775		IV	3389800	0.547988		IV	9009300	0.364734		IV	4569200	0.116407		IV	3372800	0.722214		IV	3411800	0.582507
chrIV	17165900	0.431808		IV	3483200	0.437802		IV	9062400	0.125404		IV	4591900	0.603848		IV	3447400	0.488018		IV	3443400	0.501587
chrIV	17214700	0.351081		IV	3534500	0.667044		IV	9104300	0.531237		IV	4641900	0.563462		IV	3482900	0.237189		IV	3482600	0.387713
chrIV	17277400	0.845799		IV	3553900	0.553289		IV	9149900	0.326139		IV	4666100	0.788055		IV	3508100	0.580308		IV	3512700	0.435415
chrIV	17333200	0.542357		IV	3580600	0.304237		IV	9192200	0.36194		IV	4715400	0.688562		IV	3551200	0.53902		IV	3540100	0.433725
chrIV	17376000	0.292206		IV	3601500	0.369804		IV	9214200	0.757952		IV	4755300	0.368066		IV	3580600	0.285963		IV	3580500	0.440546
chrIV	17464100	0.771141		IV	3632100	0.287756		IV	9265100	0.846438		IV	4773800	0.662032		IV	3635000	0.718441		IV	3634900	0.26834
chrV	9300	0.776005		IV	3651300	0.486572		IV	9326100	0.391669		IV	4808100	0.336138		IV	3651200	0.718441		IV	3658600	0.266875
chrV	102700	0.438331		IV	3690500	0.756009		IV	9373200	0.474126		IV	4874600	0.229772		IV	3681600	0.628077		IV	3680600	0.401681
chrV	127200	0.398917		IV	3744400	0.20606		IV	9398700	0.387576		IV	4909000	0.526917		IV	3744700	0.267785		IV	3708900	0.370026
chrV	154400	0.597434		IV	3775800	0.566149		IV	9444900	0.776361		IV	4942600	0.319007		IV	3770100	0.628948		IV	3760300	0.658435
chrV	240000	0.557243		IV	3806600	0.286036		IV	9519900	0.580863		IV	4999900	0.615147		IV	3806300	0.207513		IV	3807500	0.267615
chrV	299100	0.399359		IV	3827100	0.676627		IV	9541900	0.628855		IV	5070700	0.67804		IV	3827300	0.356286		IV	3837000	0.684883
chrV	356100	0.730575		IV	3879000	0.250861		IV	9610000	0.915323		IV	5104300	0.399097		IV	3867700	0.221178		IV	3867600	0.460514
chrV	459200	0.417405		IV	3914600	0.473048		IV	9642400	0.292436		IV	5167800	0.650982		IV	3914600	0.316424		IV	3915000	0.423926
chrV	532800	0.121998		IV	3940100	0.22361		IV	9677700	0.408835		IV	5224200	0.25686		IV	3963100	0.196926		IV	3962900	0.228895
chrV	563700	0.238319		IV	3962300	0.223496		IV	9715400	0.444283		IV	5253000	0.821216		IV	3984800	0.547839		IV	3987600	0.517468
chrV	624500	0.171676		IV	3985700	0.712176		IV	9743800	0.099228		IV	5293600	0.34924		IV	4017100	0.497558		IV	4024800	0.733554
chrV	646900	0.288677		IV	4022200	0.325528		IV	9772300	0.761693		IV	5321200	0.743586		IV	4050400	0.221995		IV	4080800	0.627568
chrV	699100	0.410143		IV	4050500	0.276134		IV	9792200	0.872085		IV	5351700	0.220819		IV	4080600	0.604749		IV	4116300	0.335549
chrV	724100	0.564389		IV	4075000	0.729948		IV	9854800	0.430856		IV	5388500	0.611591		IV	4116300	0.258413		IV	4158100	0.205175
chrV	767400	0.433882		IV	4150900	0.178291		IV	9873400	0.572614		IV	5468500	0.105797		IV	4158300	0.363651		IV	4185300	0.542237
chrV	784100	0.571677		IV	4181000	0.804488		IV	9900100	0.254102		IV	5512500	0.594953		IV	4187200	0.672299		IV	4206400	0.631264
chrV	855400	0.336135		IV	4206400	0.785974		IV	9926400	0.217693		IV	5537800	0.313729		IV	4243200	0.364116		IV	4243100	0.609395
chrV	912800	0.403674		IV	4243400	0.766055		IV	9983000	0.38387		IV	5591100	0.612509		IV	4318800	0.703544		IV	4268100	0.636211
chrV	975500	0.876453		IV	4261000	0.756437		IV	10003700	0.684969		IV	5647300	0.215262		IV	4357300	0.446976		IV	4290800	0.285001
chrV	1059600	0.624035		IV	4312600	0.651578		IV	10063000	0.233553		IV	5672300	0.541851		IV	4387300	0.57577		IV	4319000	0.654412
chrV	1152100	0.853402		IV	4386900	0.725059		IV	10083000	0.703553		IV	5710700	0.390929		IV	4449600	0.780512		IV	4403700	0.863979
chrV	1198000	0.136903		IV	4445600	0.930585		IV	10127200	0.184838		IV	5748200	0.471202		IV	4475600	0.392652		IV	4515000	0.557708
chrV	1242800	0.759442		IV	4478100	0.34863		IV	10151600	0.516592		IV	5790900	0.333217		IV	4514800	0.646344		IV	4589900	0.576813
chrV	1368300	0.236454		IV	4515000	0.649755		IV	10182200	0.746389		IV	5815300	0.693263		IV	4543600	0.207276		IV	4613400	0.151934
chrV	1390000	0.608829		IV	4541500	0.356535		IV	10223600	0.387036		IV	5855400	0.718483		IV	4569200	0.120923		IV	4637500	0.398367
chrV	1474700	0.905854		IV	4569500	0.218302		IV	10249900	0.646008		IV	5881300	0.405392		IV	4594400	0.38879		IV	4690100	0.323822
chrV	1573900	0.940468		IV	4594400	0.736911		IV	10313500	0.28791		IV	5927300	0.754005		IV	4652100	0.753004		IV	4714300	0.242619
chrV	1699400	0.619507		IV	4642300	0.671365		IV	10368800	0.628878		IV	5967000	0.702753		IV	4690100	0.140878		IV	4749300	0.403046
chrV	1740500	0.234858		IV	4715500	0.767377		IV	10421700	0.569737		IV	6002400	0.644846		IV	4716900	0.366377		IV	4773700	0.768231
chrV	1775500	0.402884		IV	4755300	0.284343		IV	10475000	0.258288		IV	6021300	0.68077		IV	4749600	0.322719		IV	4808900	0.306945
chrV	1828800	0.395142		IV	4774000	0.665477		IV	10514400	0.651172		IV	6098200	0.349874		IV	4773700	0.605352		IV	4844100	0.205407
chrV	1872200	0.709229		IV	4806800	0.46755		IV	10552100	0.543137		IV	6137100	0.457485		IV	4808700	0.579487		IV	4862200	0.247687
chrV	1971900	0.15708		IV	4844000	0.208121		IV	10568100	0.744338		IV	6189600	0.438445		IV	4844400	0.150217		IV	4890300	0.190997
chrV	2006000	0.114466		IV	4913700	0.320031		IV	10661400	0.374558		IV	6218500	0.119904		IV	4913900	0.220247		IV	4937800	0.251018
chrV	2069700	0.680447		IV	4971300	0.22489		IV	10714000	0.441343		IV	6285200	0.317005		IV	4938200	0.266883		IV	4974700	0.149314
chrV	2123800	0.71743		IV	4999900	0.657424		IV	10730200	0.698418		IV	6314800	0.567265		IV	4974800	0.593511		IV	5006100	0.204759
chrV	2183900	0.145808		IV	5071900	0.943764		IV	10760900	0.277688		IV	6339700	0.481484		IV	5005900	0.295756		IV	5029400	0.0969965
chrV	2215900	0.347987		IV	5167400	0.801042		IV	10817900	0.850394		IV	6381700	0.535229		IV	5029100	0.212841		IV	5104200	0.480458
chrV	2251900	0.164802		IV	5223500	0.339703		IV	10869200	0.549936		IV	6403300	0.510208		IV	5070600	0.519229		IV	5169100	0.567625
chrV	2280300	0.193591		IV	5293400	0.369414		IV	10934900	0.702052		IV	6438100	0.298797		IV	5104100	0.273334		IV	5227800	0.326013
chrV	2300800	0.275975		IV	5318200	0.725542		IV	10967400	0.612782		IV	6468600	0.747837		IV	5169000	0.686751		IV	5262200	0.488055
chrV	2346700	0.554567		IV	5356600	0.218996		IV	11028000	0.915375		IV	6510800	0.361261		IV	5227800	0.262318		IV	5302800	0.19548
chrV	2614800	0.663615		IV	5392200	0.578732		IV	11061900	0.139583		IV	6554400	0.193424		IV	5246100	0.683255		IV	5325500	0.415284
chrV	2654100	0.608813		IV	5476800	0.0950059		IV	11111600	0.608851		IV	6591800	0.728043		IV	5302900	0.39321		IV	5388500	0.456292
chrV	2693700	0.499759		IV	5505700	0.908123		IV	11161300	0.378033		IV	6647900	0.516461		IV	5321200	0.612741		IV	5443100	0.252586
chrV	2774600	0.239811		IV	5538400	0.614304		IV	11206800	0.536257		IV	6669600	0.422384		IV	5392400	0.441225		IV	5477300	0.171905
chrV	2812900	0.422743		IV	5594200	0.64813		IV	11320300	0.69242		IV	6755000	0.368433		IV	5468600	0.088212		IV	5505000	0.87833
chrV	2830500	0.576916		IV	5647600	0.447551		IV	11341100	0.787544		IV	6792000	0.321681		IV	5505500	0.790465		IV	5537600	0.483885
chrV	2878200	0.371944		IV	5667200	0.790765		IV	11379900	0.420523		IV	6862800	0.191437		IV	5538200	0.581199		IV	5569200	0.157458
chrV	2915700	0.489828		IV	5691300	0.318881		IV	11409000	0.643607		IV	6900700	0.507904		IV	5596200	0.639867		IV	5594400	0.593634
chrV	2933700	0.125437		IV	5749200	0.390551		IV	11431300	0.232871		IV	6950800	0.316509		IV	5647200	0.278799		IV	5622200	0.10004
chrV	2957200	0.177717		IV	5791100	0.362556		IV	11494100	0.787246		IV	6993000	0.412933		IV	5666100	0.689697		IV	5646000	0.241868
chrV	3041300	0.690256		IV	5815400	0.766846		IV	11523700	0.574295		IV	7020600	0.542047		IV	5746700	0.396894		IV	5672500	0.346028
chrV	3085100	0.141116		IV	5847800	0.711182		IV	11563800	0.544402		IV	7046900	0.144663		IV	5790700	0.288861		IV	5701900	0.315145
chrV	3200400	0.914247		IV	5881400	0.506592		IV	11601200	0.688269		IV	7067100	0.468859		IV	5815200	0.439253		IV	5747500	0.480144
chrV	3256400	0.558126		IV	5924700	0.523262		IV	11643600	0.535186		IV	7100300	0.213407		IV	5852100	0.648051		IV	5790800	0.256847
chrV	3305200	0.183715		IV	5948500	0.752586		IV	11662600	0.648566		IV	7149800	0.615981		IV	5881300	0.311904		IV	5817200	0.446183
chrV	3341500	0.128624		IV	5966800	0.646091		IV	11693700	0.630197		IV	7173200	0.606175		IV	5934100	0.44388		IV	5852000	0.651569
chrV	3448600	0.897281		IV	6002400	0.782747		IV	11714000	0.820091		IV	7214100	0.343656		IV	5967000	0.608174		IV	5879800	0.39658
chrV	3507700	0.357826		IV	6098000	0.462198		IV	11743900	0.411669		IV	7234800	0.73096		IV	6002800	0.548577		IV	5932800	0.730544
chrV	3552400	0.116619		IV	6136900	0.517536		IV	11827200	0.698505		IV	7293500	0.374395		IV	6021600	0.708924		IV	5969200	0.720929
chrV	3586300	0.699976		IV	6189700	0.322119		IV	11856800	0.42503		IV	7316400	0.466504		IV	6097800	0.355445		IV	6002500	0.548455
chrV	3646500	0.368809		IV	6285200	0.403303		IV	11913500	0.315166		IV	7333800	0.466504		IV	6137000	0.442891		IV	6021600	0.584689
chrV	3704900	0.844914		IV	6315100	0.598685		IV	11969500	0.684786		IV	7373700	0.852311		IV	6187400	0.185631		IV	6097900	0.454475
chrV	3759500	0.32889		IV	6381500	0.248588		IV	12046800	0.846411		IV	7390800	0.910494		IV	6287300	0.276423		IV	6136900	0.481804
chrV	3820700	0.119125		IV	6403200	0.414467		IV	12088200	0.320583		IV	7454100	0.288393		IV	6309800	0.375566		IV	6224000	0.182985
chrV	3862900	0.146356		IV	6429200	0.512272		IV	12124400	0.681478		IV	7480600	0.553194		IV	6331100	0.619057		IV	6259500	0.214408
chrV	3891800	0.272206		IV	6476000	0.771376		IV	12157300	0.421418		IV	7525300	0.226176		IV	6376600	0.252315		IV	6285500	0.471587
chrV	3934100	0.427837		IV	6551700	0.33143		IV	12187600	0.723935		IV	7550600	0.135652		IV	6403700	0.26436		IV	6310100	0.315708
chrV	3974500	0.717415		IV	6591700	0.680271		IV	12272700	0.629311		IV	7576000	0.66729		IV	6438100	0.281532		IV	6331200	0.535291
chrV	4026600	0.776976		IV	6631300	0.61182		IV	12305600	0.265625		IV	7632200	0.511892		IV	6476300	0.557162		IV	6383300	0.201566
chrV	4068700	0.317347		IV	6648200	0.561364		IV	12337000	0.810887		IV	7671900	0.380946		IV	6550200	0.248757		IV	6403800	0.436593
chrV	4171700	0.733985		IV	6669100	0.388649		IV	12373500	0.494942		IV	7714300	0.210446		IV	6577000	0.243995		IV	6438200	0.325802
chrV	4195400	0.491337		IV	6719200	0.997229		IV	12401500	0.538954		IV	7733300	0.705897		IV	6606300	0.157092		IV	6468600	0.643945
chrV	4308700	0.403344		IV	6754800	0.684338		IV	12467600	0.710175		IV	7769500	0.56159		IV	6631500	0.309554		IV	6550200	0.298696
chrV	4349400	0.836746		IV	6791900	0.483666		IV	12486400	0.563202		IV	7794700	0.804194		IV	6647700	0.456797		IV	6575200	0.368669
chrV	4486800	0.470776		IV	6862700	0.260986		IV	12540000	0.756706		IV	7845600	0.755356		IV	6673100	0.469715		IV	6628000	0.354698
chrV	4529300	0.439932		IV	6903100	0.784056		IV	12577100	0.251656		IV	7924900	0.631242		IV	6754500	0.540184		IV	6648400	0.578008
chrV	4555500	0.228088		IV	6951400	0.237229		IV	12617500	0.701413		IV	7953100	0.611105		IV	6792100	0.496126		IV	6675700	0.477782
chrV	4620400	0.614512		IV	6993000	0.450172		IV	12649000	0.296854		IV	8015200	0.86715		IV	6841700	0.261993		IV	6761800	0.461496
chrV	4690600	0.767584		IV	7020500	0.378213		IV	12679100	0.722707		IV	8050400	0.629059		IV	6895400	0.249362		IV	6799400	0.721062
chrV	4737500	0.657957		IV	7045500	0.213205		IV	12717000	0.315212		IV	8098500	0.55985		IV	6988500	0.455626		IV	6842300	0.16057
chrV	4820500	0.417835		IV	7067500	0.336639		IV	12790800	0.345432		IV	8124600	0.665085		IV	7020500	0.26754		IV	6895600	0.441085
chrV	4839200	0.519221		IV	7102200	0.458088		IV	12812800	0.567689		IV	8141600	0.677175		IV	7046500	0.104095		IV	6929000	0.155795
chrV	4862400	0.219764		IV	7149800	0.698317		IV	12831400	0.609184		IV	8171400	0.317367		IV	7066600	0.164795		IV	6995600	0.552244
chrV	4893500	0.343901		IV	7167900	0.681622		IV	12854200	0.391395		IV	8201000	0.121195		IV	7093800	0.506859		IV	7021900	0.323413
chrV	4963700	0.914841		IV	7210500	0.164369		IV	12930000	0.303162		IV	8235700	0.642288		IV	7149400	0.462279		IV	7066300	0.460605
chrV	5027300	0.399629		IV	7235100	0.775798		IV	12957900	0.256226		IV	8284200	0.31361		IV	7173000	0.635851		IV	7122000	0.278658
chrV	5047800	0.629291		IV	7294200	0.4616		IV	13001500	0.611268		IV	8331300	0.90267		IV	7214400	0.268015		IV	7152900	0.69464
chrV	5085900	0.27236		IV	7316800	0.554281		IV	13031900	0.622231		IV	8395100	0.728388		IV	7235200	0.519041		IV	7171300	0.707276
chrV	5131100	0.479328		IV	7370700	0.891203		IV	13085000	0.220763		IV	8422200	0.697434		IV	7293600	0.346392		IV	7218200	0.60285
chrV	5199800	0.232126		IV	7389900	0.896038		IV	13120300	0.561731		IV	8472700	0.147793		IV	7316600	0.382351		IV	7241000	0.579743
chrV	5219200	0.288199		IV	7454000	0.210424		IV	13190200	0.40248		IV	8506300	0.667742		IV	7335900	0.531462		IV	7293800	0.391799
chrV	5238600	0.517058		IV	7480600	0.66829		IV	13232500	0.715444		IV	8532700	0.409961		IV	7370800	0.576827		IV	7334100	0.420451
chrV	5273100	0.702257		IV	7550700	0.177718		IV	13250200	0.715444		IV	8550100	0.294434		IV	7390400	0.814923		IV	7370900	0.941163
chrV	5321500	0.674458		IV	7583200	0.728267		IV	13276000	0.36082		IV	8607900	0.881287		IV	7454200	0.184772		IV	7425300	0.232764
chrV	5389000	0.147141		IV	7632400	0.518477		IV	13307000	0.470268		IV	8626100	0.690303		IV	7478400	0.705558		IV	7478500	0.421465
chrV	5433000	0.42603		IV	7653900	0.510062		IV	13345800	0.385372		IV	8657100	0.309849		IV	7520100	0.271602		IV	7500700	0.501452
chrV	5475300	0.148703		IV	7672300	0.418352		IV	13394600	0.571683		IV	8691400	0.340462		IV	7550300	0.303868		IV	7522100	0.521822
chrV	5505300	0.193448		IV	7713800	0.386137		IV	13440800	0.546885		IV	8720200	0.388085		IV	7576300	0.623347		IV	7552700	0.335849
chrV	5524400	0.382729		IV	7733000	0.717403		IV	13455200	0.546885		IV	8783200	0.840161		IV	7604600	0.111776		IV	7576600	0.518861
chrV	5561000	0.391924		IV	7769800	0.324432		IV	13506100	0.512767		IV	8816400	0.640719		IV	7632200	0.491691		IV	7604900	0.109051
chrV	5582600	0.841192		IV	7792100	0.850209		IV	13543000	0.404699		IV	8842500	0.498345		IV	7654000	0.464952		IV	7631700	0.507571
chrV	5660900	0.589035		IV	7845800	0.767989		IV	13646800	0.212455		IV	8874600	0.613742		IV	7672200	0.411229		IV	7671800	0.298174
chrV	5707500	0.34955		IV	7906300	0.449931		IV	13691300	0.551763		IV	8929100	0.480211		IV	7713800	0.21822		IV	7695900	0.167381
chrV	5779100	0.777968		IV	7925300	0.751899		IV	13717800	0.810884		IV	8967900	0.223597		IV	7733200	0.602839		IV	7765300	0.154128
chrV	5827200	0.581166		IV	7952600	0.678465		IV	13756000	0.690173		IV	9009400	0.422604		IV	7766000	0.15963		IV	7798500	0.499284
chrV	5848700	0.711382		IV	7996100	0.562822		IV	13777500	0.74969		IV	9064200	0.21898		IV	7791900	0.704622		IV	7839000	0.637781
chrV	6021200	0.724183		IV	8016000	0.794048		IV	13822000	0.268133		IV	9110600	0.734537		IV	7845900	0.617773		IV	7892800	0.255531
chrV	6100800	1		IV	8050600	0.632372		IV	13845000	0.442605		IV	9191800	0.346136		IV	7924800	0.699244		IV	7924900	0.775161
chrV	6228900	0.952341		IV	8097900	0.691544		IV	13888200	0.908063		IV	9214000	0.51335		IV	7952800	0.531998		IV	7952500	0.38722
chrV	6271000	0.330634		IV	8124600	0.72344		IV	13922200	0.125251		IV	9265200	0.807648		IV	8005300	0.546415		IV	8000600	0.488614
chrV	6327600	0.229096		IV	8141100	0.72344		IV	13945100	0.627084		IV	9328700	0.322943		IV	8057900	0.238772		IV	8057200	0.224958
chrV	6373500	0.24169		IV	8168600	0.210925		IV	13988400	0.247149		IV	9373000	0.64978		IV	8089600	0.377227		IV	8089600	0.528245
chrV	6427100	0.703345		IV	8200900	0.304833		IV	14034000	0.953841		IV	9398700	0.330543		IV	8122000	0.25021		IV	8118900	0.200887
chrV	6470500	0.528501		IV	8226600	0.379311		IV	14071700	0.391811		IV	9420800	0.225469		IV	8141700	0.524342		IV	8182400	0.325836
chrV	6513200	0.350419		IV	8290200	0.819414		IV	14104800	0.228962		IV	9444800	0.772296		IV	8168300	0.182795		IV	8229600	0.586908
chrV	6537400	0.342889		IV	8334000	0.934742		IV	14128200	0.3192		IV	9520000	0.55669		IV	8200700	0.237135		IV	8268200	0.38182
chrV	6587800	0.560403		IV	8397900	0.660273		IV	14198700	0.433321		IV	9539900	0.646257		IV	8226900	0.427052		IV	8299300	0.45997
chrV	6655100	0.177056		IV	8429500	0.728679		IV	14220900	0.432554		IV	9584700	0.225428		IV	8267000	0.573135		IV	8333100	0.830714
chrV	6679500	0.538182		IV	8473200	0.223153		IV	14264100	0.431241		IV	9609800	0.879743		IV	8290600	0.767396		IV	8365500	0.255523
chrV	6712800	0.467505		IV	8507400	0.646956		IV	14299000	0.803376		IV	9642600	0.593668		IV	8332300	0.835991		IV	8401200	0.406836
chrV	6796800	0.687443		IV	8532800	0.455387		IV	14331500	0.3149		IV	9677900	0.442767		IV	8365600	0.285256		IV	8426800	0.651085
chrV	6879400	0.781636		IV	8550100	0.262927		IV	14354700	0.25396		IV	9715100	0.566658		IV	8400700	0.586115		IV	8469200	0.241354
chrV	6929800	0.256609		IV	8603200	0.439761		IV	14387700	0.347522		IV	9743800	0.148178		IV	8507300	0.564471		IV	8504600	0.587732
chrV	6955200	0.287034		IV	8625800	0.770096		IV	14422100	0.217299		IV	9769400	0.818317		IV	8528300	0.490759		IV	8522500	0.658144
chrV	6999000	0.453066		IV	8657000	0.236298		IV	14454800	0.786953		IV	9791900	0.770272		IV	8552600	0.181378		IV	8554500	0.421282
chrV	7059100	0.565054		IV	8691400	0.570913		IV	14495300	0.2557		IV	9873200	0.401762		IV	8603000	0.343157		IV	8609300	0.796767
chrV	7112100	0.602548		IV	8720300	0.327802		IV	14520000	0.263838		IV	9893300	0.6096		IV	8629500	0.516173		IV	8631400	0.711248
chrV	7195400	0.814107		IV	8739500	0.672885		IV	14557100	0.617096		IV	9926300	0.180657		IV	8691400	0.439485		IV	8672500	0.48708
chrV	7236400	0.455845		IV	8782900	0.791497		IV	14589600	0.64492		IV	9977300	0.72994		IV	8720600	0.272654		IV	8725600	0.546345
chrV	7327900	0.154544		IV	8816300	0.796416		IV	14630300	0.183917		IV	10008700	0.717438		IV	8782800	0.674031		IV	8784500	0.848573
chrV	7383400	0.0987643		IV	8842600	0.560647		IV	14662300	0.591115		IV	10063200	0.225139		IV	8816200	0.50346		IV	8816300	0.475041
chrV	7437600	0.213989		IV	8875500	0.577235		IV	14767400	0.526254		IV	10119500	0.379217		IV	8840200	0.578518		IV	8870300	0.375236
chrV	7462400	0.251091		IV	8924700	0.625608		IV	14796300	0.704737		IV	10145500	0.684147		IV	8870200	0.671966		IV	8911000	0.264119
chrV	7575900	0.493335		IV	8968000	0.287452		IV	14827800	0.686228		IV	10179700	0.771651		IV	8929100	0.490107		IV	8967500	0.265415
chrV	7595800	0.679322		IV	9001400	0.368639		IV	14870700	0.596109		IV	10223900	0.512084		IV	8967700	0.175648		IV	9016200	0.350535
chrV	7686800	0.229272		IV	9039600	0.287158		IV	14906400	0.375033		IV	10249900	0.54686		IV	9007800	0.536207		IV	9068900	0.310581
chrV	7742500	0.950743		IV	9058300	0.307822		IV	14954900	0.673482		IV	10273200	0.259446		IV	9032500	0.430029		IV	9088400	0.316299
chrV	7771300	0.366432		IV	9104600	0.658246		IV	15016100	0.356046		IV	10291200	0.503408		IV	9064100	0.261014		IV	9124000	0.614174
chrV	7804300	0.545265		IV	9149500	0.432108		IV	15042300	0.69033		IV	10311300	0.404218		IV	9110000	0.640227		IV	9149300	0.224137
chrV	7853200	0.580984		IV	9192100	0.428357		IV	15143400	0.567116		IV	10353500	0.702521		IV	9149400	0.291318		IV	9190700	0.54654
chrV	7979300	0.901184		IV	9212100	0.654545		IV	15177800	0.239926		IV	10429700	0.514326		IV	9192400	0.36019		IV	9213300	0.74568
chrV	8016900	0.393366		IV	9265600	0.929754		IV	15199000	0.45971		IV	10471500	0.500282		IV	9213300	0.654778		IV	9263100	0.710789
chrV	8039500	0.541832		IV	9317700	0.422108		IV	15261000	0.45964		IV	10515500	0.725073		IV	9265600	0.707174		IV	9328800	0.313192
chrV	8129700	0.331245		IV	9373300	0.649039		IV	15289500	0.18539		IV	10550100	0.679506		IV	9328000	0.259775		IV	9354200	0.303096
chrV	8206500	0.49069		IV	9398600	0.353265		IV	15314000	0.510081		IV	10574400	0.566608		IV	9373700	0.513259		IV	9374300	0.57212
chrV	8221300	0.529525		IV	9420700	0.248743		IV	15332200	0.209225		IV	10656900	0.477204		IV	9398800	0.431802		IV	9398700	0.46256
chrV	8303000	0.609606		IV	9442200	0.753886		IV	15352300	0.382841		IV	10714200	0.688957		IV	9441800	0.752959		IV	9442000	0.717914
chrV	8354500	0.525984		IV	9486400	0.282044		IV	15390100	0.355234		IV	10755700	0.334326		IV	9515200	0.462586		IV	9497200	0.627843
chrV	8406100	0.476877		IV	9539600	0.628381		IV	15414000	0.52403		IV	10817500	0.765639		IV	9539800	0.620693		IV	9514800	0.394882
chrV	8455900	0.419769		IV	9586800	0.356071		IV	15449400	0.398302		IV	10869200	0.580565		IV	9585400	0.135651		IV	9539800	0.640539
chrV	8532900	0.896477		IV	9609700	0.919509		IV	15473300	0.647807		IV	10965400	0.643425		IV	9609600	0.758735		IV	9582000	0.124921
chrV	8604200	0.716123		IV	9644900	0.542972		IV	15531000	0.380483		IV	10998100	0.190766		IV	9641800	0.276912		IV	9617600	0.60046
chrV	8666800	0.30476		IV	9677700	0.534331		IV	15572400	0.782341		IV	11028000	0.887728		IV	9677400	0.404133		IV	9641900	0.21708
chrV	8787600	0.957554		IV	9714400	0.545826		IV	15648400	0.783939		IV	11061800	0.177767		IV	9714900	0.445101		IV	9677800	0.506601
chrV	8942600	0.185899		IV	9743800	0.13083		IV	15716100	0.515939		IV	11105400	0.54667		IV	9772400	0.506694		IV	9715100	0.345296
chrV	8966500	0.40513		IV	9772400	0.606017		IV	15746700	0.29233		IV	11168200	0.430635		IV	9792000	0.697112		IV	9744400	0.143196
chrV	9092900	0.888474		IV	9792200	0.78333		IV	15771100	0.359349		IV	11208800	0.529947		IV	9825200	0.340831		IV	9783500	0.739395
chrV	9175800	0.104026		IV	9824700	0.378832		IV	15790100	0.479275		IV	11272300	0.154711		IV	9854800	0.353283		IV	9850300	0.428534
chrV	9213700	0.310061		IV	9854700	0.458026		IV	15825400	0.346045		IV	11319800	0.664436		IV	9874200	0.428921		IV	9874200	0.326844
chrV	9243300	0.285633		IV	9874100	0.497377		IV	15859700	0.364992		IV	11341300	0.735399		IV	9899100	0.453529		IV	9893500	0.661932
chrV	9275100	0.518639		IV	9896300	0.496001		IV	15945400	0.532957		IV	11380400	0.437034		IV	9926600	0.178339		IV	9926400	0.196356
chrV	9342400	0.814264		IV	9931300	0.200461		IV	16024500	0.610018		IV	11409300	0.676431		IV	9977000	0.312526		IV	9947100	0.448514
chrV	9386100	0.733488		IV	9958700	0.481377		IV	16047900	0.650828		IV	11425900	0.676431		IV	10003800	0.652279		IV	9977200	0.701865
chrV	9422700	0.250242		IV	9977200	0.575871		IV	16090000	0.269806		IV	11494200	0.755725		IV	10062700	0.25127		IV	10008600	0.632436
chrV	9441600	0.510845		IV	10004000	0.8		IV	16114800	0.366845		IV	11523500	0.186702		IV	10088000	0.6063		IV	10062500	0.236968
chrV	9547400	0.799339		IV	10062800	0.300408		IV	16181000	0.59473		IV	11563400	0.503244		IV	10127300	0.379831		IV	10141000	0.286201
chrV	9646200	0.352476		IV	10088300	0.799529		IV	16225400	0.177305		IV	11601000	0.721737		IV	10181300	0.465919		IV	10185100	0.723784
chrV	9697900	0.582137		IV	10124900	0.355034		IV	16247800	0.709817		IV	11620900	0.306516		IV	10224000	0.50749		IV	10246600	0.688819
chrV	9731300	0.591714		IV	10151200	0.628966		IV	16292600	0.353833		IV	11643800	0.632031		IV	10249400	0.599175		IV	10276600	0.037765
chrV	9786400	0.442097		IV	10176300	0.674257		IV	16395000	0.904116		IV	11660100	0.672917		IV	10291600	0.538176		IV	10293100	0.137649
chrV	9857400	0.751405		IV	10223800	0.409305		IV	16496500	0.803931		IV	11694000	0.599205		IV	10313200	0.456735		IV	10313300	0.277961
chrV	9923600	0.510313		IV	10249900	0.592566		IV	16554000	0.20395		IV	11711600	0.86032		IV	10332600	0.115572		IV	10331800	0.132807
chrV	9981100	0.700298		IV	10285900	0.466232		IV	16586800	0.17531		IV	11744000	0.250024		IV	10353500	0.717802		IV	10353400	0.383445
chrV	10038400	0.846142		IV	10311700	0.457305		IV	16610700	0.334481		IV	11806300	0.408087		IV	10393000	0.116635		IV	10393300	0.758511
chrV	10125200	0.220751		IV	10370100	0.626711		IV	16648900	0.723121		IV	11826000	0.766603		IV	10475400	0.483938		IV	10431900	0.538042
chrV	10177900	0.328974		IV	10421800	0.597901		IV	16666500	0.91871		IV	11913500	0.179208		IV	10505200	0.329155		IV	10470700	0.497406
chrV	10240200	0.661058		IV	10475400	0.584308		IV	16728800	0.192835		IV	11969300	0.633528		IV	10550100	0.616225		IV	10500500	0.127983
chrV	10326800	0.405251		IV	10514000	0.690328		IV	16848700	0.48503		IV	12005500	0.15451		IV	10574400	0.3959		IV	10574500	0.673102
chrV	10357700	0.680908		IV	10549500	0.582228		IV	16933700	0.24079		IV	12047100	0.802564		IV	10615800	0.244651		IV	10622000	0.240536
chrV	10463800	0.794951		IV	10662000	0.406602		IV	16959100	0.62511		IV	12088100	0.371877		IV	10661700	0.39288		IV	10645600	0.623207
chrV	10535400	0.655833		IV	10714100	0.663335		IV	16986500	0.097051		IV	12124600	0.600252		IV	10696600	0.247667		IV	10662700	0.33154
chrV	10583000	0.571988		IV	10730700	0.663335		IV	17008000	0.456016		IV	12157200	0.175878		IV	10715000	0.275925		IV	10699200	0.274345
chrV	10656700	0.200087		IV	10817600	0.785246		IV	17046500	0.472188		IV	12187600	0.845825		IV	10761200	0.361063		IV	10718200	0.655578
chrV	10717400	0.794737		IV	10878700	0.574988		IV	17087300	0.804086		IV	12220100	0.177378		IV	10817900	0.762293		IV	10755900	0.381186
chrV	10740100	0.723946		IV	10934700	0.71586		IV	17128800	0.693598		IV	12273300	0.567178		IV	10910500	0.200262		IV	10823400	0.844004
chrV	10809500	0.471166		IV	10967600	0.692521		IV	17164400	0.785542		IV	12306000	0.372565		IV	10934900	0.668918		IV	10865000	0.627845
chrV	10855100	0.201028		IV	10997300	0.227492		IV	17215100	0.48203		IV	12337300	0.66003		IV	10964900	0.481841		IV	10910600	0.205969
chrV	10899100	0.861419		IV	11022700	0.869931		IV	17239300	0.674055		IV	12378400	0.481839		IV	11031200	0.763655		IV	10935200	0.550318
chrV	10942600	0.725027		IV	11062000	0.230629		IV	17275000	0.799797		IV	12401300	0.608451		IV	11061900	0.400449		IV	10966400	0.629375
chrV	10967500	0.645255		IV	11107700	0.413715		IV	17335600	0.568681		IV	12445600	0.26358		IV	11083300	0.159781		IV	11031300	0.816617
chrV	11035200	0.552251		IV	11207600	0.631068		IV	17374800	0.629075		IV	12467400	0.635914		IV	11107700	0.783467		IV	11059700	0.309576
chrV	11077100	0.720817		IV	11272600	0.240869		IV	17393400	0.565801		IV	12486500	0.557839		IV	11165000	0.194083		IV	11089800	0.823817
chrV	11118900	0.263697		IV	11315000	0.510922		IV	17466000	0.829429		IV	12540400	0.91363		IV	11209400	0.54715		IV	11108000	0.435436
chrV	11209600	0.669968		IV	11343300	0.514547		IV	17490700	#N/A		IV	12577500	0.217411		IV	11271700	0.257412		IV	11141200	0.250183
chrV	11231500	0.739845		IV	11380200	0.410618		V	8700	0.734055		IV	12597200	0.334859		IV	11315200	0.364935		IV	11170500	0.28912
chrV	11282900	0.470208		IV	11409200	0.700888		V	100900	0.624727		IV	12621200	0.633289		IV	11341600	0.57518		IV	11209200	0.360331
chrV	11338500	0.773414		IV	11428900	0.61101		V	133500	0.552348		IV	12648700	0.234173		IV	11380300	0.2835		IV	11273600	0.343745
chrV	11410300	0.361233		IV	11474600	0.352653		V	154400	0.432639		IV	12678900	0.63162		IV	11408900	0.684369		IV	11318200	0.443372
chrV	11438700	0.275161		IV	11496700	0.738348		V	199500	0.283555		IV	12717000	0.389007		IV	11432200	0.367061		IV	11341900	0.647356
chrV	11490800	0.36198		IV	11523600	0.773651		V	239400	0.558569		IV	12761000	0.18029		IV	11494400	0.578217		IV	11381100	0.269425
chrV	11513900	0.709744		IV	11563600	0.825492		V	303300	0.811079		IV	12812600	0.650828		IV	11523500	0.303369		IV	11409300	0.421912
chrV	11548900	0.242525		IV	11620500	0.458165		V	343100	0.480148		IV	12831600	0.674849		IV	11564000	0.607632		IV	11431300	0.478858
chrV	11571000	0.327448		IV	11643900	0.649665		V	363300	0.72021		IV	12892200	0.201102		IV	11601500	0.441414		IV	11456700	0.146753
chrV	11614100	0.239672		IV	11660200	0.649665		V	453300	0.440549		IV	12957900	0.385168		IV	11643500	0.662307		IV	11490200	0.310744
chrV	11639900	0.19936		IV	11693700	0.642793		V	472500	0.723253		IV	13000200	0.855129		IV	11660400	0.662307		IV	11528300	0.457792
chrV	11674100	0.590925		IV	11717500	0.583933		V	538600	0.394147		IV	13035200	0.50078		IV	11692200	0.491944		IV	11564000	0.543443
chrV	11773600	0.628847		IV	11744000	0.401875		V	569300	0.410768		IV	13081800	0.536931		IV	11718400	0.523607		IV	11601200	0.523131
chrV	11845200	0.653462		IV	11806400	0.72772		V	598100	0.522776		IV	13120300	0.630576		IV	11749900	0.292958		IV	11620900	0.501923
chrV	11896400	0.792839		IV	11826900	0.787158		V	638500	0.234566		IV	13183000	0.513723		IV	11823300	0.499371		IV	11643800	0.638552
chrV	11954500	0.861254		IV	11857000	0.609484		V	664000	0.296578		IV	13232200	0.349469		IV	11857200	0.179717		IV	11660300	0.589255
chrV	11985100	0.455838		IV	11912400	0.271396		V	697400	0.811324		IV	13250400	0.605356		IV	11908200	0.130848		IV	11693800	0.47988
chrV	12000300	0.455838		IV	11930800	0.498543		V	724600	0.49605		IV	13275900	0.573444		IV	11970700	0.673025		IV	11717800	0.602145
chrV	12041000	0.580325		IV	11970400	0.653579		V	767000	0.507397		IV	13307200	0.557743		IV	12044900	0.69988		IV	11750000	0.493589
chrV	12068400	0.19453		IV	12005800	0.217756		V	809800	0.112666		IV	13344500	0.360664		IV	12087900	0.302783		IV	11820800	0.693537
chrV	12111900	0.541552		IV	12048100	0.834392		V	830100	0.11056		IV	13396100	0.783659		IV	12123300	0.647076		IV	11848100	0.293638
chrV	12192600	0.465914		IV	12089100	0.56324		V	869900	0.199637		IV	13455400	0.457069		IV	12157400	0.397388		IV	11866000	0.432215
chrV	12215100	0.74582		IV	12122200	0.811783		V	910000	0.396512		IV	13513400	0.451763		IV	12214400	0.490858		IV	11912300	0.310923
chrV	12279100	0.383762		IV	12157400	0.525635		V	932900	0.0186376		IV	13544300	0.547899		IV	12278500	0.674819		IV	11970700	0.660455
chrV	12301400	0.455957		IV	12191200	0.91346		V	973900	0.70648		IV	13574400	0.325118		IV	12306300	0.394748		IV	12005800	0.286898
chrV	12405000	0.288948		IV	12247500	0.23763		V	995800	0.679273		IV	13646800	0.340737		IV	12334800	0.605209		IV	12044300	0.679273
chrV	12447200	0.593585		IV	12271700	0.703004		V	1055200	0.735517		IV	13691100	0.521951		IV	12366600	0.266123		IV	12078600	0.17534
chrV	12469500	0.491192		IV	12336900	0.933412		V	1155100	0.813757		IV	13717500	0.762165		IV	12398800	0.464601		IV	12123800	0.590015
chrV	12497600	0.566861		IV	12367000	0.309838		V	1227800	0.612159		IV	13755600	0.731723		IV	12467900	0.604316		IV	12273600	0.330247
chrV	12527200	0.11786		IV	12402400	0.581814		V	1247900	0.726243		IV	13777300	0.727841		IV	12540400	0.590962		IV	12306500	0.347065
chrV	12550300	0.176186		IV	12486500	0.727616		V	1310700	0.264576		IV	13794700	0.611019		IV	12578200	0.259774		IV	12337500	0.881509
chrV	12640100	0.631881		IV	12540000	0.649776		V	1335200	0.405039		IV	13821900	0.374099		IV	12617800	0.61636		IV	12381200	0.475588
chrV	12695800	0.223099		IV	12597000	0.342877		V	1368100	0.308059		IV	13844500	0.445367		IV	12684700	0.460075		IV	12398600	0.690001
chrV	12743900	0.348726		IV	12620500	0.649498		V	1390500	0.607109		IV	13884200	0.864477		IV	12717700	0.395603		IV	12468400	-0.493982
chrV	12765400	0.546477		IV	12648500	0.283711		V	1436500	0.265869		IV	13922200	0.161618		IV	12760200	0.11263		IV	12484500	0.748112
chrV	12816600	0.602014		IV	12684200	0.782427		V	1473800	0.807763		IV	13941800	0.571822		IV	12786000	0.250291		IV	12541000	0.849144
chrV	12861300	0.092929		IV	12717700	0.407525		V	1574000	0.892617		IV	13988400	0.298528		IV	12813300	0.216336		IV	12578100	0.57971
chrV	12901200	0.636727		IV	12760200	0.316721		V	1629000	0.177036		IV	14033900	0.945786		IV	12832300	0.292473		IV	12617500	0.704365
chrV	12951100	0.578331		IV	12787300	0.377086		V	1658300	0.467123		IV	14128300	0.415602		IV	12858100	0.495383		IV	12679400	0.577963
chrV	12968800	0.824178		IV	12812900	0.429834		V	1692300	0.695749		IV	14199100	0.522989		IV	12895900	0.239656		IV	12715200	0.41162
chrV	13022300	0.608639		IV	12831900	0.463716		V	1725900	0.216116		IV	14220300	0.213161		IV	12929400	0.500253		IV	12760600	0.106778
chrV	13048600	0.337451		IV	12858300	0.338227		V	1751300	0.304242		IV	14264000	0.698153		IV	12957900	0.368066		IV	12781300	0.28779
chrV	13158200	0.78552		IV	12892100	0.213866		V	1784200	0.310161		IV	14299200	0.851488		IV	12999800	0.589019		IV	12812400	0.674754
chrV	13288900	0.260727		IV	12930000	0.531116		V	1872200	0.739763		IV	14331300	0.269912		IV	13030600	0.578251		IV	12838900	0.598675
chrV	13333500	0.361361		IV	12957800	0.414427		V	1930600	0.331986		IV	14354600	0.349966		IV	13081800	0.542092		IV	12858000	0.5852
chrV	13396400	0.747815		IV	12999600	0.610551		V	2010700	0.538046		IV	14387500	0.390452		IV	13121100	0.524088		IV	12906100	0.173165
chrV	13463200	0.494122		IV	13030200	0.558254		V	2036400	0.315872		IV	14416000	0.226918		IV	13191400	0.48162		IV	12928100	0.544276
chrV	13500100	0.193679		IV	13087000	0.561469		V	2062300	0.686185		IV	14454600	0.808041		IV	13232300	0.738564		IV	12959000	0.464601
chrV	13564000	0.327935		IV	13158500	0.182851		V	2141900	0.737659		IV	14495200	0.319074		IV	13275600	0.243524		IV	12999900	0.496052
chrV	13657500	0.59957		IV	13190400	0.421758		V	2170000	0.292699		IV	14519900	0.409768		IV	13305600	0.545957		IV	13035500	0.66397
chrV	13683600	0.508658		IV	13232300	0.743939		V	2215700	0.564403		IV	14557200	0.641812		IV	13393600	0.360517		IV	13079800	0.641739
chrV	13710100	0.17257		IV	13274800	0.602632		V	2280800	0.254338		IV	14589600	0.659375		IV	13414300	0.562805		IV	13128500	0.550854
chrV	13787700	0.50207		IV	13305300	0.584226		V	2302200	0.383385		IV	14606200	0.499753		IV	13455200	0.575995		IV	13189000	0.727459
chrV	13813800	0.717848		IV	13344700	0.499454		V	2346400	0.63946		IV	14630800	0.246716		IV	13506000	0.386067		IV	13217500	0.673449
chrV	13890400	0.407538		IV	13394300	0.532414		V	2596200	0.631698		IV	14669800	0.580931		IV	13542900	0.557028		IV	13275200	0.531393
chrV	13961300	0.480461		IV	13455200	0.613466		V	2637900	0.389112		IV	14720000	0.254318		IV	13619800	0.282148		IV	13321600	0.579395
chrV	14011300	0.602086		IV	13543100	0.544323		V	2653300	0.789736		IV	14760200	0.857118		IV	13649900	0.337933		IV	13376000	0.441335
chrV	14049500	0.419237		IV	13574400	0.314203		V	2675200	0.736674		IV	14797200	0.542694		IV	13698800	0.464681		IV	13394300	0.571474
chrV	14092900	0.108982		IV	13603500	0.33972		V	2691400	0.737406		IV	14827800	0.66542		IV	13721000	0.57995		IV	13454900	0.606267
chrV	14136200	0.814763		IV	13660700	0.733893		V	2773900	0.703485		IV	14870500	0.589388		IV	13755900	0.60894		IV	13511300	0.503318
chrV	14183000	0.465776		IV	13691200	0.574266		V	2823400	0.667742		IV	14906100	0.356784		IV	13773300	0.47248		IV	13543300	0.591416
chrV	14202800	0.548462		IV	13717700	0.774496		V	2911600	0.206152		IV	14954900	0.542719		IV	13796700	0.59326		IV	13619700	0.214625
chrV	14276400	0.295473		IV	13756400	0.356672		V	2946200	0.178744		IV	15016000	0.410773		IV	13822000	0.314374		IV	13646300	0.256075
chrV	14298500	0.227226		IV	13778200	0.74324		V	2966900	0.649621		IV	15042700	0.711382		IV	13893000	0.737003		IV	13691200	0.386133
chrV	14358500	0.69521		IV	13822000	0.402888		V	3004800	0.154483		IV	15071700	0.301296		IV	13945100	0.318612		IV	13721000	0.572917
chrV	14426000	0.910182		IV	13844400	0.341		V	3037700	0.370976		IV	15143600	0.529036		IV	13988500	0.348749		IV	13755900	0.689958
chrV	14503000	0.865958		IV	13887500	0.642955		V	3064800	0.472231		IV	15179300	0.278998		IV	14033600	0.830102		IV	13821200	0.262131
chrV	14600600	0.284107		IV	13922200	0.316235		V	3096900	0.187936		IV	15197900	0.417947		IV	14071300	0.39394		IV	13844100	0.204474
chrV	14645000	0.337176		IV	13941400	0.604934		V	3122100	0.385546		IV	15284000	0.200875		IV	14102800	0.224312		IV	13873400	0.265528
chrV	14696500	0.860095		IV	13988200	0.365001		V	3175600	0.377769		IV	15314000	0.206355		IV	14128500	0.4528		IV	13899000	0.790306
chrV	14732400	0.3814		IV	14033800	0.930102		V	3196900	0.590207		IV	15336600	0.510767		IV	14162100	0.208249		IV	13941200	0.506766
chrV	14791700	0.698259		IV	14070800	0.487377		V	3220900	0.679344		IV	15351100	0.510767		IV	14191100	0.732361		IV	13962400	0.610623
chrV	14828800	0.61328		IV	14104100	0.394543		V	3256600	0.414011		IV	15390000	0.364548		IV	14220900	0.382116		IV	13988000	0.168333
chrV	14850000	0.690679		IV	14128300	0.472226		V	3274300	0.471031		IV	15449000	0.747995		IV	14263700	0.536759		IV	14043200	0.798928
chrV	14897400	0.493887		IV	14190300	0.739376		V	3304400	0.26166		IV	15488700	0.510485		IV	14299500	0.708083		IV	14064900	0.275218
chrV	15002300	0.863813		IV	14220900	0.426281		V	3337400	0.216607		IV	15510800	0.24278		IV	14332300	0.263323		IV	14097100	0.229615
chrV	15064700	0.796682		IV	14246800	0.072615		V	3380900	0.378643		IV	15576100	0.800829		IV	14357500	0.213691		IV	14125000	0.372593
chrV	15143400	0.221051		IV	14263700	0.555326		V	3425300	0.379551		IV	15642400	0.641675		IV	14388700	0.277574		IV	14162100	0.331967
chrV	15188800	0.609533		IV	14299300	0.795576		V	3449100	0.834761		IV	15689400	0.296715		IV	14413100	0.192207		IV	14190300	0.754152
chrV	15212300	0.488033		IV	14331300	0.40886		V	3507600	0.528378		IV	15716100	0.58579		IV	14454500	0.36297		IV	14225800	0.320197
chrV	15236500	0.139294		IV	14354600	0.449461		V	3552200	0.711213		IV	15746600	0.383099		IV	14494800	0.26395		IV	14262700	0.56176
chrV	15260200	0.343731		IV	14387500	0.575167		V	3570000	0.711213		IV	15769600	0.354057		IV	14520000	0.24052		IV	14297400	0.757234
chrV	15305700	0.233792		IV	14422000	0.390407		V	3646100	0.697101		IV	15791200	0.430389		IV	14557200	0.506631		IV	14333100	0.137058
chrV	15393700	0.709712		IV	14454400	0.763939		V	3685000	0.842879		IV	15859600	0.60134		IV	14589700	0.384225		IV	14354300	0.30558
chrV	15497700	0.804571		IV	14495000	0.417797		V	3724100	0.639779		IV	15895700	0.374874		IV	14624100	0.228135		IV	14391200	0.175625
chrV	15516500	0.827307		IV	14520000	0.442515		V	3757400	0.638104		IV	15940400	0.190321		IV	14662500	0.37808		IV	14416100	0.175609
chrV	15578800	0.546709		IV	14557000	0.698239		V	3786200	0.229579		IV	15990500	0.180015		IV	14720200	0.21002		IV	14451300	0.508799
chrV	15604700	0.490156		IV	14589700	0.631818		V	3840500	0.15344		IV	16024200	0.535731		IV	14760200	0.764425		IV	14494800	0.464245
chrV	15659300	0.512766		IV	14606200	0.631818		V	3871100	0.247056		IV	16048400	0.67102		IV	14796300	0.403143		IV	14520200	0.616408
chrV	15700400	0.260421		IV	14630200	0.180584		V	3894400	0.544878		IV	16084600	0.407623		IV	14834200	0.579156		IV	14556800	0.51138
chrV	15768500	0.567743		IV	14662600	0.545107		V	3927600	0.223286		IV	16180900	0.543346		IV	14870700	0.640541		IV	14591600	0.307192
chrV	15799400	0.140856		IV	14701800	0.156995		V	3972700	0.570826		IV	16225000	0.170377		IV	14906000	0.205666		IV	14629900	0.329513
chrV	15821400	0.153327		IV	14720700	0.349899		V	4005200	0.240048		IV	16247300	0.733379		IV	14955100	0.491341		IV	14662900	0.305452
chrV	15878800	0.382129		IV	14767200	0.706771		V	4028400	0.577235		IV	16293300	0.416123		IV	15016600	0.343932		IV	14695100	0.111293
chrV	15912800	0.182819		IV	14796600	0.673781		V	4084700	0.559702		IV	16394700	0.846083		IV	15043000	0.602309		IV	14739400	0.12272
chrV	15957000	0.184652		IV	14827800	0.756463		V	4113700	0.222209		IV	16502800	0.703373		IV	15109700	0.637464		IV	14760800	0.774762
chrV	16039800	0.926049		IV	14870800	0.71073		V	4138300	0.220464		IV	16551300	0.185837		IV	15137600	0.626975		IV	14796800	0.475559
chrV	16095400	0.314705		IV	14905900	0.328177		V	4164900	0.613967		IV	16586700	0.216272		IV	15179600	0.174744		IV	14833000	0.562859
chrV	16161600	0.326769		IV	14955200	0.736763		V	4189600	0.59112		IV	16610700	0.362502		IV	15200500	0.47488		IV	14870800	0.559211
chrV	16194200	0.222814		IV	15016000	0.525791		V	4257000	0.381131		IV	16649000	0.80606		IV	15289900	0.416642		IV	14901100	0.469856
chrV	16222000	0.270679		IV	15042600	0.692085		V	4299300	0.850822		IV	16665500	0.927666		IV	15314000	0.490738		IV	14929900	0.204929
chrV	16262300	0.254595		IV	15072100	0.323921		V	4327200	0.279031		IV	16707200	0.247155		IV	15354900	0.380898		IV	14955200	0.419256
chrV	16358100	0.837879		IV	15106600	0.396164		V	4349300	0.80884		IV	16729200	0.271352		IV	15389700	0.592487		IV	15009600	0.129156
chrV	16401100	0.432204		IV	15152600	0.399141		V	4416500	0.464314		IV	16854000	0.774652		IV	15457400	0.379781		IV	15043000	0.569869
chrV	16420500	0.522508		IV	15178100	0.238463		V	4487500	0.660682		IV	16877500	0.335446		IV	15510900	0.598313		IV	15074000	0.130154
chrV	16498000	0.456885		IV	15201300	0.382146		V	4513100	0.486159		IV	16933700	0.356682		IV	15531600	0.27037		IV	15109600	0.598011
chrV	16554100	0.471404		IV	15243000	0.425379		V	4535800	0.489669		IV	16959100	0.783845		IV	15572600	0.648654		IV	15143300	0.539886
chrV	16597800	0.223981		IV	15292700	0.203373		V	4561200	0.389313		IV	17008000	0.578604		IV	15604000	0.228757		IV	15178900	0.237161
chrV	16620500	0.265963		IV	15314000	0.528864		V	4594900	0.148066		IV	17049700	0.351382		IV	15648900	0.701232		IV	15197600	0.378444
chrV	16665800	0.214278		IV	15351200	0.404909		V	4632000	0.592785		IV	17087000	0.77243		IV	15689700	0.108705		IV	15253600	0.489817
chrV	16693900	0.580082		IV	15390200	0.476818		V	4691400	0.278188		IV	17128800	0.849124		IV	15716000	0.564566		IV	15290000	0.145806
chrV	16742400	0.808081		IV	15414000	0.478484		V	4734600	0.574297		IV	17164400	0.75029		IV	15750400	0.162885		IV	15311500	0.249693
chrV	16793400	0.581166		IV	15483100	0.5921		V	4809200	0.366422		IV	17215800	0.468805		IV	15771400	0.61595		IV	15331700	0.446379
chrV	16820300	0.307941		IV	15527600	0.484369		V	4831000	0.69397		IV	17239900	0.567463		IV	15791400	0.343903		IV	15352000	0.420198
chrV	16874600	0.179289		IV	15572500	0.808672		V	4864500	0.458656		IV	17274800	0.773767		IV	15825800	0.213718		IV	15390200	0.319735
chrV	16912500	0.660745		IV	15646100	0.853225		V	4889300	0.397785		IV	17336000	0.436298		IV	15860100	0.313855		IV	15413800	0.48639
chrV	16966200	0.646003		IV	15690700	0.164271		V	4963900	0.916621		IV	17367400	0.567265		IV	15901600	0.159378		IV	15452600	0.754623
chrV	17038500	0.132895		IV	15716100	0.573754		V	5056100	0.612471		IV	17393400	0.588008		IV	15940300	0.373859		IV	15489300	0.0977365
chrV	17125100	0.976682		IV	15750300	0.538939		V	5081300	0.364184		IV	17432400	0.0942242		IV	15997900	0.128361		IV	15510400	0.29024
chrV	17221000	0.550001		IV	15769500	0.38079		V	5105000	0.190023		IV	17466100	0.725204		IV	16024500	0.442776		IV	15536300	0.264283
chrV	17263800	0.600211		IV	15791300	0.508785		V	5125300	0.184109		IV	17491400	#N/A		IV	16048200	0.530318		IV	15572100	0.628873
chrV	17298400	0.240551		IV	15860200	0.650873		V	5193000	0.390452		V	8400	0.62466		IV	16084800	0.1597		IV	15642200	0.419815
chrV	17317200	0.608188		IV	15896000	0.47695		V	5218000	0.546812		V	94100	0.888808		IV	16138000	0.406646		IV	15662900	0.609912
chrV	17382000	0.47358		IV	15945200	0.655555		V	5238900	0.164663		V	133800	0.485168		IV	16166100	0.746362		IV	15689700	0.287332
chrV	17457500	0.150325		IV	15997600	0.120354		V	5270900	0.739832		V	171700	0.552044		IV	16181300	0.516557		IV	15714800	0.547538
chrV	17512200	0.358569		IV	16024700	0.774644		V	5295400	0.235218		V	199500	0.274142		IV	16225100	0.226734		IV	15733000	0.413929
chrV	17539100	0.265829		IV	16049500	0.591086		V	5322400	0.617464		V	300200	0.851305		IV	16256800	0.624285		IV	15771400	0.122103
chrV	17580600	0.463519		IV	16098100	0.225864		V	5393600	0.393723		V	342800	0.378961		IV	16290100	0.586282		IV	15796700	0.590143
chrV	17657300	0.276164		IV	16130100	0.212499		V	5432600	0.399695		V	363500	0.704773		IV	16399000	0.658561		IV	15825600	0.354542
chrV	17684800	0.33091		IV	16224100	0.261396		V	5482400	0.398105		V	409800	0.316759		IV	16494100	0.641564		IV	15859400	0.49465
chrV	17723000	0.478128		IV	16247800	0.677254		V	5503600	0.351532		V	450800	0.444036		IV	16551100	0.525352		IV	15901500	0.220943
chrV	17748000	0.329729		IV	16293000	0.522301		V	5528200	0.468434		V	472600	0.736649		IV	16586600	0.246364		IV	15940400	0.146821
chrV	17778700	0.291629		IV	16394900	0.794124		V	5586900	0.762732		V	513100	0.128058		IV	16610800	0.361613		IV	15957400	0.308472
chrV	17857600	0.814254		IV	16436900	0.298026		V	5669700	0.482008		V	569400	0.376975		IV	16648700	0.701066		IV	15979300	0.10885
chrV	17928400	0.35285		IV	16463700	0.108143		V	5700600	0.415091		V	598200	0.624729		IV	16671200	0.781138		IV	16024800	0.551965
chrV	17951900	0.771322		IV	16498700	0.759432		V	5760900	0.317491		V	638700	0.248935		IV	16706900	0.346065		IV	16048300	0.630815
chrV	17990000	0.45529		IV	16527300	0.316771		V	5785200	0.463802		V	666800	0.517819		IV	16729100	0.303626		IV	16084700	0.364729
chrV	18020400	0.496203		IV	16553900	0.341201		V	5824600	0.358351		V	697400	0.824075		IV	16764900	0.793387		IV	16140000	0.241633
chrV	18051400	0.514151		IV	16586800	0.249686		V	5849300	0.671155		V	722900	0.725476		IV	16809200	0.218972		IV	16166300	0.745049
chrV	18080000	0.766702		IV	16610700	0.472866		V	5868700	0.605579		V	767700	0.417005		IV	16854000	0.737855		IV	16181300	0.601713
chrV	18109500	0.27073		IV	16648900	0.692926		V	5917600	0.186851		V	784900	0.389587		IV	16891900	0.129845		IV	16225800	0.214375
chrV	18180600	0.140614		IV	16707100	0.280472		V	5967300	0.450121		V	809800	0.164938		IV	16933800	0.26143		IV	16256700	0.649624
chrV	18220200	0.398336		IV	16770700	0.452966		V	6019600	0.707635		V	847700	0.119309		IV	16960600	0.580022		IV	16290100	0.688472
chrV	18255300	0.156484		IV	16800900	0.268559		V	6041700	0.766205		V	869700	0.216891		IV	17007700	0.411019		IV	16319900	0.1883
chrV	18290300	0.653557		IV	16849300	0.507936		V	6107300	1		V	895300	0.295199		IV	17049500	0.424051		IV	16399000	0.815777
chrV	18315700	0.122454		IV	16934300	0.337235		V	6141800	0.159796		V	913700	0.206581		IV	17087000	0.681061		IV	16474100	0.356628
chrV	18366600	0.459728		IV	16959100	0.70565		V	6166900	0.32991		V	932900	0.297317		IV	17128300	0.638336		IV	16498500	0.682387
chrV	18394400	0.226089		IV	16983700	0.193859		V	6212200	0.736404		V	951700	0.424274		IV	17165700	0.600249		IV	16551000	0.166134
chrV	18416200	0.615005		IV	17007900	0.479737		V	6232100	0.91016		V	973900	0.628265		IV	17215300	0.355689		IV	16610800	0.357548
chrV	18461400	0.419036		IV	17049600	0.687349		V	6271900	0.16672		V	995000	0.659169		IV	17240600	0.610577		IV	16648700	0.475362
chrV	18489400	0.3204		IV	17087000	0.828963		V	6292600	0.159937		V	1022300	0.206139		IV	17274800	0.532005		IV	16675900	0.796171
chrV	18591200	0.911309		IV	17128700	0.788465		V	6327800	0.157921		V	1056300	0.753236		IV	17335400	0.4994		IV	16706800	0.224874
chrV	18682400	0.401584		IV	17165900	0.725564		V	6385500	0.359133		V	1090000	0.323813		IV	17367000	0.524514		IV	16728900	0.184105
chrV	18703800	0.43572		IV	17215200	0.551617		V	6427300	0.406995		V	1154800	0.786331		IV	17393600	0.220975		IV	16828700	0.136779
chrV	18725400	0.487172		IV	17239800	0.606011		V	6468100	0.603724		V	1186900	0.294891		IV	17466000	0.716651		IV	16854000	0.393531
chrV	18808100	0.266976		IV	17335900	0.67367		V	6518100	0.550333		V	1223100	0.540361		V	8900	0.777868		IV	16877500	0.390802
chrV	18839200	0.190697		IV	17367500	0.413994		V	6547400	0.338389		V	1247600	0.800203		V	101400	0.493892		IV	16913300	0.185048
chrV	18867400	0.599968		IV	17393400	0.433963		V	6590800	0.58901		V	1271800	0.435565		V	127000	0.640954		IV	16961200	0.624074
chrV	18903000	0.72403		IV	17426800	0.252876		V	6618000	0.400544		V	1313900	0.355993		V	154300	0.517508		IV	17008000	0.457284
chrV	18973100	0.626719		IV	17466200	0.883848		V	6669700	0.767944		V	1335100	0.514484		V	194300	0.173417		IV	17049200	0.633492
chrV	19006600	0.41965		IV	17491000	#N/A		V	6704900	0.515679		V	1368100	0.358235		V	240200	0.588509		IV	17089200	0.508164
chrV	19082500	0.798973		V	8700	0.817526		V	6718900	0.68983		V	1390500	0.70508		V	303500	0.70463		IV	17128200	0.680657
chrV	19126500	0.671339		V	29700	0.797011		V	6779200	0.255198		V	1435700	0.334025		V	343200	0.657381		IV	17165800	0.378528
chrV	19190300	0.757977		V	100900	0.918782		V	6804200	0.691782		V	1473500	0.648868		V	362800	0.687039		IV	17210800	0.213668
chrV	19243200	0.676896		V	126500	0.765651		V	6836700	0.248201		V	1496800	0.568261		V	389100	0.309378		IV	17234200	0.70685
chrV	19303600	0.792221		V	154100	0.610538		V	6879800	0.869202		V	1557000	0.792278		V	409400	0.61038		IV	17335500	0.447738
chrV	19328700	0.315067		V	171500	0.53959		V	6932300	0.252132		V	1573700	0.924794		V	450900	0.577234		IV	17367100	0.584293
chrV	19352100	0.361959		V	199800	0.302806		V	6964800	0.255963		V	1629000	0.203491		V	472600	0.532983		IV	17393800	0.145157
chrV	19376900	0.0809642		V	239600	0.583266		V	6995300	0.591168		V	1658500	0.508		V	512600	0.133834		IV	17466000	0.427871
chrV	19527900	0.884706		V	303300	0.874372		V	7058000	0.508501		V	1692300	0.675786		V	571000	0.177047		IV	17491500	#N/A
chrV	19623400	0.352258		V	343400	0.446182		V	7097500	0.311131		V	1725800	0.348843		V	598100	0.532397		V	39800	0.62058
chrV	19648100	0.576916		V	363400	0.761463		V	7152500	0.222431		V	1751300	0.433707		V	632700	0.191622		V	73500	0.221321
chrV	19673700	0.189593		V	402500	0.155143		V	7198300	0.54903		V	1784400	0.527107		V	670700	0.380866		V	93400	0.675533
chrV	19729000	0.516606		V	450700	0.414088		V	7226800	0.397819		V	1805100	0.51286		V	699300	0.412331		V	125100	0.303114
chrV	19779700	0.20449		V	472500	0.655401		V	7244300	0.368491		V	1831500	0.124798		V	723100	0.326031		V	159100	0.590933
chrV	19801800	0.222854		V	569200	0.496702		V	7317400	0.254693		V	1870100	0.632073		V	769900	0.513395		V	210700	0.388525
chrV	19819400	0.427654		V	638800	0.206807		V	7353100	0.572766		V	1930700	0.441319		V	784500	0.496093		V	239900	0.2434
chrV	19875400	0.292453		V	669500	0.655538		V	7390300	0.405826		V	1966700	0.463407		V	810400	0.467773		V	256700	0.549062
chrV	19898500	0.45157		V	699800	0.810937		V	7437200	0.401782		V	2010600	0.643405		V	844600	0.157132		V	303700	0.666777
chrV	19955200	0.535212		V	724900	0.464558		V	7512600	0.373412		V	2036000	0.235472		V	869900	0.338336		V	339500	0.454492
chrV	20007000	0.755268		V	767800	0.480003		V	7576300	0.421233		V	2061500	0.698691		V	910800	0.57236		V	361100	0.669364
chrV	20072400	0.739055		V	809500	0.124519		V	7600400	0.503568		V	2141900	0.76619		V	948900	0.29251		V	392000	0.293598
chrV	20181700	0.504607		V	830100	0.117824		V	7685900	0.154369		V	2169800	0.295798		V	975400	0.466707		V	454400	0.514075
chrV	20198100	0.296765		V	847700	0.333747		V	7739200	0.826534		V	2216200	0.593712		V	996900	0.560413		V	468700	0.566958
chrV	20250200	0.45979		V	870000	0.347047		V	7801000	0.506523		V	2254400	0.280821		V	1022600	0.251911		V	543500	0.38164
chrV	20271600	0.690179		V	909900	0.62962		V	7818600	0.376189		V	2278900	0.37585		V	1060000	0.737773		V	570900	0.589858
chrV	20341300	0.336907		V	933100	0.679216		V	7851700	0.588276		V	2302500	0.142781		V	1090000	0.294059		V	605900	0.5582
chrV	20381000	0.776697		V	951700	0.351092		V	7983600	0.902095		V	2346600	0.520774		V	1150400	0.736804		V	631600	0.250052
chrV	20412800	0.824288		V	974000	0.596593		V	8016500	0.337913		V	2596100	0.516814		V	1205700	0.108708		V	666600	0.382276
chrV	20475400	0.701587		V	998600	0.537487		V	8038800	0.548002		V	2637800	0.506902		V	1227900	0.637567		V	698800	0.54893
chrV	20532100	0.366814		V	1018700	0.235173		V	8098700	0.332961		V	2675200	0.79694		V	1243800	0.237919		V	723200	0.654488
chrV	20573200	0.430881		V	1055100	0.804516		V	8134600	0.468174		V	2713300	0.42507		V	1266800	0.587669		V	764600	0.341855
chrV	20651800	0.724997		V	1154800	0.795913		V	8176000	0.183042		V	2771000	0.730215		V	1304000	0.315204		V	791100	0.422839
chrV	20712000	0.422407		V	1222400	0.232073		V	8222100	0.657372		V	2823000	0.632793		V	1339000	0.28055		V	810500	0.200937
chrV	20746000	0.162035		V	1251200	0.738582		V	8258600	0.477006		V	2911100	0.613416		V	1368300	0.219236		V	844700	0.193778
chrV	20775900	0.337242		V	1265900	0.736099		V	8345000	0.359691		V	2946100	0.1512		V	1388900	0.441827		V	870900	0.255495
chrV	20830400	0.638335		V	1309100	0.372538		V	8410500	0.633167		V	2966900	0.404195		V	1439600	0.516007		V	911500	0.365026
chrV	20922000	#N/A		V	1335300	0.602637		V	8450800	0.449568		V	3007700	0.274989		V	1473200	0.730276		V	948100	0.569259
chrX	42600	0.592896		V	1367600	0.781594		V	8532800	0.783984		V	3037700	0.790514		V	1549000	0.432015		V	980300	0.779622
chrX	71700	0.375517		V	1390100	0.55413		V	8602700	0.716217		V	3064600	0.623448		V	1573500	0.585892		V	1022000	0.342403
chrX	103800	0.44484		V	1436400	0.400324		V	8644400	0.482044		V	3097000	0.33395		V	1629500	0.400713		V	1054900	0.666931
chrX	139700	0.53403		V	1471200	0.912122		V	8678700	0.322323		V	3122300	0.375451		V	1660200	0.394929		V	1093400	0.371628
chrX	171400	0.776951		V	1494700	0.666729		V	8735400	0.0883961		V	3151900	0.555246		V	1699500	0.605521		V	1145300	0.497283
chrX	206900	0.587823		V	1554600	0.718406		V	8781900	0.723701		V	3175500	0.424879		V	1726600	0.16336		V	1161600	0.637002
chrX	253800	0.837269		V	1573600	0.573607		V	8898600	0.264289		V	3195000	0.390807		V	1766300	0.607076		V	1212000	0.590362
chrX	297500	0.222484		V	1626500	0.29636		V	8949200	0.342154		V	3221400	0.698368		V	1787200	0.539774		V	1236900	0.412988
chrX	319100	0.38732		V	1658800	0.644185		V	8967700	0.313414		V	3256500	0.377031		V	1829400	0.149783		V	1303900	0.256724
chrX	353000	0.257206		V	1692300	0.751738		V	8993000	0.309432		V	3274400	0.422655		V	1870000	0.504159		V	1365100	0.278707
chrX	390400	0.69843		V	1725800	0.331424		V	9030000	0.411931		V	3304200	0.391347		V	1893200	0.367555		V	1390000	0.284465
chrX	432700	0.231135		V	1751400	0.293523		V	9093200	0.932187		V	3337300	0.277125		V	1927900	0.208792		V	1439500	0.655244
chrX	473600	0.250853		V	1784300	0.242273		V	9121600	0.404023		V	3380700	0.368186		V	1967600	0.377954		V	1475000	0.736844
chrX	501100	0.161703		V	1821800	0.122592		V	9147400	0.469086		V	3425200	0.449498		V	2010500	0.420926		V	1549200	0.407147
chrX	536000	0.426339		V	1845100	0.136574		V	9183000	0.287313		V	3450400	0.814921		V	2064600	0.698214		V	1584500	0.586867
chrX	594400	0.905826		V	1870000	0.467674		V	9224000	0.727868		V	3507700	0.460112		V	2122900	0.403799		V	1629600	0.298549
chrX	693400	0.727604		V	1895100	0.568526		V	9248600	0.360561		V	3549400	0.380632		V	2145700	0.625855		V	1659300	0.365238
chrX	728000	0.484892		V	1934100	0.420188		V	9278600	0.696461		V	3570100	0.556202		V	2170000	0.155515		V	1699700	0.644793
chrX	764200	0.366974		V	1972400	0.317201		V	9343000	0.743845		V	3646200	0.691775		V	2222300	0.430579		V	1726300	0.1895
chrX	828200	0.495189		V	2010500	0.632529		V	9386000	0.641471		V	3684000	0.587746		V	2247000	0.534955		V	1745800	0.300226
chrX	853400	0.478691		V	2035900	0.156655		V	9417400	0.153528		V	3719300	0.722302		V	2306100	0.146801		V	1784000	0.676012
chrX	871500	0.623087		V	2061400	0.430744		V	9441100	0.328104		V	3757400	0.825722		V	2346900	0.565054		V	1815900	0.572734
chrX	915800	0.147836		V	2082100	0.744393		V	9503100	0.241849		V	3786200	0.324224		V	2606000	0.726672		V	1838400	0.652103
chrX	954500	0.421979		V	2126500	0.697907		V	9547000	0.835791		V	3836200	0.26402		V	2637800	0.280065		V	1873600	0.669191
chrX	988000	0.297562		V	2144600	0.818485		V	9575900	0.338047		V	3871000	0.574808		V	2653200	0.659437		V	1891800	0.718254
chrX	1009900	0.521761		V	2169600	0.397283		V	9625400	0.134792		V	3894500	0.561928		V	2675200	0.409144		V	1927800	0.576243
chrX	1093700	0.30265		V	2201400	0.475646		V	9654100	0.329847		V	3927800	0.42396		V	2694300	0.436171		V	1970000	0.540473
chrX	1122500	0.691854		V	2215900	0.559448		V	9698200	0.360445		V	3971900	0.560929		V	2713700	0.47359		V	2010500	0.665631
chrX	1191100	0.755892		V	2254700	0.277726		V	9732000	0.584117		V	4005400	0.374467		V	2778500	0.681844		V	2036800	0.143859
chrX	1223100	0.600509		V	2280500	0.415311		V	9770400	0.264341		V	4028800	0.439058		V	2880100	0.41803		V	2064700	0.693443
chrX	1252700	0.307215		V	2302500	0.472304		V	9791500	0.459455		V	4114600	0.267225		V	2920700	0.283146		V	2102700	0.20229
chrX	1302200	0.311562		V	2346500	0.594467		V	9836800	0.274285		V	4135900	0.176888		V	2966700	0.252908		V	2122600	0.429061
chrX	1342500	0.397464		V	2596300	0.705155		V	9862300	0.477165		V	4164900	0.838197		V	3004900	0.223178		V	2145800	0.549681
chrX	1398500	0.248371		V	2638000	0.501661		V	9923800	0.253293		V	4180800	0.802018		V	3037900	0.440896		V	2169700	0.277657
chrX	1450600	0.861397		V	2675300	0.651531		V	9980700	0.818998		V	4214100	0.355973		V	3064200	0.3559		V	2216500	0.596042
chrX	1494100	0.428324		V	2694200	0.742876		V	10005700	0.693882		V	4256900	0.325528		V	3106100	0.540543		V	2271300	0.465924
chrX	1531600	0.486382		V	2713300	0.384362		V	10039200	0.864581		V	4300800	0.857328		V	3122100	0.540543		V	2346500	0.614224
chrX	1557900	0.322741		V	2771100	0.726009		V	10124900	0.331917		V	4322700	0.338609		V	3151900	0.38505		V	2606100	0.745271
chrX	1581100	0.399483		V	2823700	0.596073		V	10145600	0.547234		V	4352000	0.759727		V	3176100	0.178537		V	2652200	0.256758
chrX	1601300	0.472774		V	2880000	0.642162		V	10169000	0.454923		V	4388900	0.141046		V	3201400	0.37875		V	2677600	0.808582
chrX	1623500	0.647469		V	2910900	0.491105		V	10186100	0.30474		V	4416000	0.381421		V	3274100	0.403603		V	2713400	0.381323
chrX	1657500	0.381332		V	2945900	0.205099		V	10240100	0.704152		V	4482600	0.919572		V	3304800	0.434175		V	2753900	0.31266
chrX	1688400	0.125596		V	3010000	0.359334		V	10342900	0.855763		V	4536000	0.596694		V	3337200	0.167516		V	2778400	0.632718
chrX	1714700	0.496051		V	3037700	0.799748		V	10439800	0.373383		V	4561600	0.484667		V	3380500	0.305391		V	2884200	0.431069
chrX	1746000	0.535827		V	3062900	0.687838		V	10468200	0.56531		V	4595000	0.400333		V	3424900	0.37158		V	2913100	0.259896
chrX	1800600	0.829529		V	3097100	0.42715		V	10534700	0.76844		V	4632000	0.575642		V	3449700	0.699219		V	2967100	0.56358
chrX	1856400	0.791619		V	3122000	0.603417		V	10597400	0.651436		V	4670700	0.282658		V	3507800	0.546111		V	3007400	0.229772
chrX	1911100	0.18735		V	3154900	0.537597		V	10627500	0.07774		V	4696000	0.735352		V	3552500	0.274972		V	3040000	0.272282
chrX	1957000	0.392932		V	3170200	0.394491		V	10653200	0.221435		V	4742600	0.548342		V	3586600	0.305047		V	3064900	0.360049
chrX	1997100	0.628726		V	3196800	0.363081		V	10677700	0.611092		V	4772000	0.149527		V	3609900	0.56802		V	3105500	0.197349
chrX	2045500	0.954545		V	3221800	0.775771		V	10717500	0.829436		V	4808900	0.48881		V	3646400	0.59626		V	3151400	0.30059
chrX	2089100	0.340754		V	3256500	0.251909		V	10810200	0.651448		V	4831100	0.554421		V	3684100	0.667594		V	3176600	0.402315
chrX	2108600	0.433852		V	3274500	0.565109		V	10861900	0.139836		V	4867100	0.492434		V	3723900	0.562002		V	3201500	0.756539
chrX	2135000	0.222809		V	3308000	0.501039		V	10895300	0.700407		V	4888500	0.203124		V	3757500	0.567679		V	3215600	0.756539
chrX	2238200	0.876933		V	3337700	0.400865		V	10943600	0.771769		V	4963800	0.905387		V	3793300	0.144568		V	3241000	0.370529
chrX	2287600	0.534654		V	3375300	0.476818		V	10968400	0.438078		V	4994800	0.405293		V	3841400	0.174809		V	3274200	0.439817
chrX	2329100	0.632467		V	3425200	0.389253		V	11035100	0.788853		V	5038000	0.653883		V	3895000	0.590616		V	3304400	0.486832
chrX	2370900	0.893733		V	3448700	0.833625		V	11082100	0.819169		V	5056300	0.34978		V	3927500	0.609138		V	3337200	0.246832
chrX	2432100	0.741993		V	3507500	0.589337		V	11126800	0.46287		V	5077600	0.47872		V	3972900	0.690762		V	3359900	0.352555
chrX	2454300	0.824333		V	3552500	0.669534		V	11181100	0.188056		V	5131200	0.519766		V	4003200	0.175064		V	3380300	0.414913
chrX	2496500	0.467123		V	3571400	0.490848		V	11208700	0.612148		V	5159800	0.272192		V	4026500	0.6857		V	3424700	0.370231
chrX	2552300	0.649013		V	3646200	0.733802		V	11233800	0.570612		V	5193100	0.464847		V	4066200	0.578175		V	3449500	0.776714
chrX	2583600	0.378476		V	3684000	0.536264		V	11283800	0.761266		V	5217500	0.697685		V	4113600	0.429429		V	3508400	0.435558
chrX	2703700	0.916633		V	3702800	0.423009		V	11313500	0.577261		V	5238600	0.198974		V	4136000	0.181005		V	3548700	0.348744
chrX	2732900	0.270748		V	3724200	0.671192		V	11333300	0.839806		V	5270900	0.731828		V	4165300	0.381348		V	3589600	0.435163
chrX	2793700	0.805312		V	3757700	0.850705		V	11377100	0.229698		V	5317000	0.794295		V	4195300	0.364174		V	3610100	0.531508
chrX	2854300	0.154788		V	3786200	0.334001		V	11425000	0.469534		V	5393500	0.505163		V	4217200	0.458938		V	3646500	0.536268
chrX	2880600	0.467189		V	3840700	0.373018		V	11491200	0.526811		V	5425900	0.322074		V	4257200	0.336788		V	3684300	0.401996
chrX	2902000	0.499041		V	3864000	0.218784		V	11520600	0.371219		V	5482600	0.312634		V	4299400	0.863865		V	3724000	0.62416
chrX	2929700	0.446582		V	3894200	0.614777		V	11548600	0.473293		V	5503600	0.306943		V	4327300	0.297989		V	3751000	0.625478
chrX	2993900	0.500533		V	3927600	0.573045		V	11571900	0.391196		V	5528700	0.389666		V	4349100	0.560336		V	3793800	0.247095
chrX	3065100	0.333478		V	3972700	0.510823		V	11643900	0.348765		V	5584800	0.791608		V	4388600	0.193666		V	3841500	0.140656
chrX	3102200	0.823516		V	4005300	0.365553		V	11672500	0.825733		V	5669900	0.452263		V	4416100	0.494526		V	3900100	0.428594
chrX	3130400	0.493916		V	4027800	0.606103		V	11701900	0.459469		V	5695400	0.56489		V	4451300	0.193865		V	3932000	0.622871
chrX	3224800	0.481305		V	4072100	0.612304		V	11735300	0.222495		V	5760800	0.364194		V	4486900	0.436779		V	3972500	0.772392
chrX	3259600	0.465062		V	4140100	0.252802		V	11773400	0.69694		V	5785400	0.327727		V	4511300	0.281606		V	4007800	0.358159
chrX	3315500	0.573399		V	4160900	0.619699		V	11824500	0.356395		V	5824200	0.203758		V	4535900	0.437728		V	4086300	0.550185
chrX	3347900	0.223465		V	4217600	0.353074		V	11849000	0.739483		V	5849400	0.704984		V	4561700	0.548676		V	4113900	0.530712
chrX	3408500	0.671094		V	4256800	0.273174		V	11895700	0.639185		V	5870700	0.600112		V	4620800	0.392878		V	4136000	0.247747
chrX	3470000	0.843938		V	4299500	0.836961		V	11951100	0.865856		V	5917700	0.38009		V	4639400	0.703227		V	4165700	0.66813
chrX	3541000	0.691417		V	4322700	0.214325		V	11994200	0.513813		V	5967300	0.458138		V	4690800	0.229665		V	4195400	0.48185
chrX	3606200	0.339513		V	4349000	0.787614		V	12041300	0.837525		V	6020000	0.772043		V	4734700	0.626209		V	4217900	0.450031
chrX	3653200	0.287369		V	4394300	0.119608		V	12078000	0.518963		V	6041600	0.725429		V	4750500	0.376062		V	4256500	0.450876
chrX	3678600	0.697776		V	4422800	0.602123		V	12112100	0.594892		V	6107400	0.69369		V	4809000	0.373416		V	4299400	0.924757
chrX	3737000	0.619144		V	4451500	0.228876		V	12185000	0.504868		V	6141900	0.250666		V	4867300	0.247876		V	4325100	0.200198
chrX	3789000	0.355512		V	4487000	0.700036		V	12207500	0.652338		V	6166000	0.24719		V	4888700	0.175087		V	4352800	0.698976
chrX	3815400	0.340243		V	4512700	0.279774		V	12275800	0.715143		V	6210300	0.638589		V	4963400	0.548979		V	4388400	0.268589
chrX	3830700	0.372223		V	4536500	0.51084		V	12292500	0.50657		V	6232000	0.879516		V	4995000	0.333089		V	4415800	0.516367
chrX	3872500	0.211584		V	4563800	0.499706		V	12315100	0.481726		V	6272000	0.167638		V	5056100	0.616444		V	4451300	0.097836
chrX	3898100	0.106452		V	4594700	0.148283		V	12343400	0.155848		V	6322200	0.175329		V	5079000	0.284761		V	4486400	0.278586
chrX	3973700	0.864424		V	4630300	0.471419		V	12369700	0.397564		V	6385400	0.148037		V	5130400	0.22684		V	4511600	0.56504
chrX	4010200	0.0479019		V	4670800	0.135078		V	12404700	0.344984		V	6427200	0.435979		V	5159600	0.348465		V	4535800	0.46627
chrX	4063600	0.170171		V	4691800	0.284547		V	12465100	0.535597		V	6466700	0.679534		V	5193000	0.318297		V	4555500	0.433185
chrX	4127600	0.407586		V	4710700	0.281527		V	12527500	0.435343		V	6518300	0.49617		V	5238400	0.197856		V	4691000	0.248014
chrX	4153000	0.868785		V	4734500	0.627487		V	12579800	0.145066		V	6547100	0.375273		V	5271000	0.724046		V	4734700	0.644258
chrX	4221000	0.825611		V	4772200	0.144581		V	12604800	0.198039		V	6589900	0.559161		V	5295000	0.158183		V	4809200	0.500148
chrX	4258100	0.415276		V	4808900	0.417192		V	12639300	0.633918		V	6620100	0.443801		V	5316900	0.535082		V	4838800	0.374533
chrX	4295100	0.115249		V	4830800	0.600156		V	12662700	0.611418		V	6645500	0.251951		V	5393700	0.404852		V	4865200	0.542389
chrX	4383800	0.366825		V	4864800	0.352979		V	12737200	0.171127		V	6669700	0.805391		V	5423700	0.201932		V	4921100	0.261328
chrX	4469600	0.381228		V	4888400	0.240261		V	12762700	0.596714		V	6704600	0.413958		V	5482600	0.363434		V	4961800	0.50259
chrX	4523100	0.875531		V	4965600	0.761029		V	12790500	0.172814		V	6724100	0.627182		V	5505500	0.195385		V	4995000	0.536897
chrX	4555900	0.189601		V	4994800	0.246911		V	12863600	0.563222		V	6777400	0.393228		V	5528700	0.661985		V	5026800	0.615468
chrX	4613900	0.721114		V	5040900	0.651099		V	12903200	0.691885		V	6803900	0.379889		V	5561300	0.1962		V	5056300	0.236483
chrX	4653000	0.264891		V	5080000	0.424301		V	12951900	0.706002		V	6834400	0.348024		V	5587300	0.285766		V	5078600	0.311562
chrX	4702200	0.811885		V	5105100	0.370301		V	13024500	0.63247		V	6858700	0.501182		V	5661400	0.677432		V	5100100	0.525988
chrX	4751500	0.768142		V	5125200	0.264241		V	13080600	0.681692		V	6884000	0.83955		V	5692700	0.503261		V	5131000	0.576402
chrX	4802800	0.853795		V	5192900	0.511306		V	13115600	0.230541		V	6932300	0.344029		V	5722000	0.470023		V	5193200	0.405984
chrX	4881100	0.639054		V	5211500	0.889198		V	13157300	0.851806		V	6964700	0.467295		V	5760300	0.219397		V	5219500	0.294486
chrX	4898800	0.572183		V	5238500	0.234192		V	13200100	0.217875		V	6998100	0.4722		V	5785400	0.407787		V	5245100	0.222202
chrX	4966100	0.934506		V	5271100	0.737305		V	13261800	0.37586		V	7057800	0.298403		V	5819400	0.20803		V	5274000	0.529356
chrX	4999800	0.145391		V	5295100	0.196163		V	13293100	0.856985		V	7097600	0.321763		V	5846200	0.202062		V	5314700	0.772918
chrX	5022900	0.288638		V	5316900	0.707651		V	13335000	0.503371		V	7123300	0.262963		V	5867700	0.457615		V	5393300	0.42154
chrX	5086100	0.870697		V	5355500	0.383808		V	13398100	0.648505		V	7159000	0.254248		V	5917600	0.680591		V	5450200	0.392307
chrX	5122600	0.459331		V	5433200	0.611357		V	13466300	0.509367		V	7226700	0.340167		V	5968200	0.250527		V	5468400	0.312044
chrX	5210200	0.804687		V	5459900	0.342753		V	13490200	0.365259		V	7250100	0.168084		V	6020100	0.538791		V	5505300	0.43087
chrX	5281400	0.220768		V	5482600	0.463321		V	13515200	0.417372		V	7317200	0.367345		V	6089100	0.778347		V	5529000	0.273314
chrX	5301100	0.486665		V	5503700	0.26663		V	13559600	0.703804		V	7364200	0.564884		V	6108000	1		V	5561200	0.624607
chrX	5337500	0.44939		V	5537700	0.516628		V	13573800	0.735631		V	7390300	0.348287		V	6141900	0.21468		V	5598900	0.378651
chrX	5360000	0.676775		V	5669600	0.358704		V	13632600	0.125861		V	7437100	0.277688		V	6166700	0.433967		V	5661600	0.733564
chrX	5475700	0.904459		V	5692500	0.462935		V	13658800	0.880215		V	7513500	0.673241		V	6210800	0.370308		V	5695600	0.393291
chrX	5516600	0.443513		V	5711600	0.658751		V	13710100	0.556915		V	7600500	0.571681		V	6237000	0.45614		V	5760300	0.199467
chrX	5591600	0.721842		V	5760800	0.219751		V	13752400	0.185894		V	7661300	0.114964		V	6271700	0.270488		V	5785400	0.210994
chrX	5641600	0.486382		V	5787500	0.369239		V	13811200	0.785845		V	7685600	0.134849		V	6327500	0.254055		V	5853000	0.601146
chrX	5695600	0.785011		V	5824600	0.322288		V	13888000	0.450308		V	7739000	0.905216		V	6372700	0.321359		V	5925200	0.683011
chrX	5774900	0.541767		V	5849500	0.46248		V	13916300	0.270751		V	7800000	0.299232		V	6426400	0.426205		V	5968300	0.596145
chrX	5811500	0.402978		V	5870600	0.554255		V	13945700	0.201074		V	7818800	0.297955		V	6466700	0.410807		V	5988100	0.665167
chrX	5841400	0.544038		V	5917800	0.394772		V	13964600	0.596637		V	7851700	0.577752		V	6518000	0.470419		V	6021000	0.631138
chrX	5995300	0.896482		V	5967200	0.632756		V	14013100	0.658854		V	7908800	0.306197		V	6542800	0.436286		V	6048300	0.543857
chrX	6048300	0.547033		V	6019500	0.649127		V	14039000	0.528419		V	7983800	0.874837		V	6588100	0.66687		V	6073600	0.338622
chrX	6092100	0.522711		V	6041700	0.637592		V	14092200	0.11422		V	8015900	0.281406		V	6617900	0.312215		V	6108100	0.691231
chrX	6151300	0.600024		V	6057400	0.610984		V	14136600	0.626454		V	8038700	0.535678		V	6669600	0.447952		V	6141600	0.262398
chrX	6208100	0.56678		V	6107400	0.772411		V	14182800	0.405506		V	8073000	0.257918		V	6704800	0.421582		V	6166700	0.413249
chrX	6223000	0.639142		V	6141800	0.281453		V	14233600	0.263148		V	8098700	0.530169		V	6722900	0.692639		V	6212400	0.498651
chrX	6256400	0.898241		V	6166200	0.263396		V	14270300	0.326675		V	8134500	0.510553		V	6788100	0.632545		V	6271200	0.463637
chrX	6293000	0.210967		V	6191500	0.176248		V	14326200	0.598479		V	8175700	0.452908		V	6840500	0.210401		V	6327300	0.385424
chrX	6341500	0.413515		V	6211100	0.459768		V	14344000	0.222233		V	8200100	0.814116		V	6879600	0.744307		V	6373100	0.61788
chrX	6374700	0.748794		V	6235100	0.772806		V	14366900	0.482899		V	8258500	0.546659		V	6894800	0.659648		V	6427000	0.837062
chrX	6448500	0.324602		V	6271700	0.254796		V	14426400	0.856255		V	8291500	0.648738		V	6932300	0.400334		V	6468100	0.675213
chrX	6505700	0.319337		V	6297600	0.149283		V	14500700	0.775571		V	8309000	0.648738		V	6996300	0.45334		V	6512300	0.366027
chrX	6551800	0.289447		V	6322400	0.219633		V	14598200	0.28146		V	8340700	0.624912		V	7057800	0.529952		V	6536900	0.545953
chrX	6625100	0.869152		V	6370400	0.259166		V	14644700	0.388258		V	8410500	0.535124		V	7097400	0.396831		V	6581600	0.376372
chrX	6690500	0.326111		V	6427800	0.532099		V	14697200	0.726723		V	8448800	0.688749		V	7115700	0.644369		V	6617400	0.146643
chrX	6743800	0.770233		V	6471900	0.514291		V	14732100	0.268264		V	8479400	0.426538		V	7151400	0.452251		V	6669900	0.496537
chrX	6804700	0.850361		V	6518100	0.690372		V	14792700	0.838231		V	8532800	0.884749		V	7197100	0.371241		V	6704800	0.404012
chrX	6848500	0.194824		V	6543000	0.438488		V	14835000	0.556102		V	8597100	0.711589		V	7225900	0.400725		V	6723000	0.597982
chrX	6894700	0.516504		V	6590300	0.583768		V	14929500	0.417429		V	8644600	0.588657		V	7240800	0.514769		V	6779700	0.212238
chrX	6928600	0.378559		V	6619900	0.41174		V	14956900	0.154016		V	8678700	0.340714		V	7299800	0.128498		V	6803200	0.377842
chrX	6996400	0.5238		V	6645500	0.23515		V	15007300	0.803152		V	8735500	0.0751294		V	7317300	0.251252		V	6840700	0.281263
chrX	7068400	0.711457		V	6669700	0.279625		V	15063900	0.622886		V	8781700	0.670383		V	7355400	0.578561		V	6880100	0.810754
chrX	7100000	0.454399		V	6722300	0.749523		V	15092100	0.305938		V	8939400	0.445509		V	7390000	0.201402		V	6929900	0.445101
chrX	7151900	0.769951		V	6779100	0.311385		V	15143600	0.605534		V	8969300	0.263082		V	7437200	0.246585		V	6998700	0.373505
chrX	7230800	0.667803		V	6804400	0.650133		V	15189100	0.609491		V	8992900	0.393021		V	7495700	0.186377		V	7055200	0.642326
chrX	7263600	0.618281		V	6833900	0.35944		V	15239800	0.126707		V	9029800	0.434924		V	7555500	0.130529		V	7069900	0.637598
chrX	7312700	0.506752		V	6879700	0.872655		V	15260100	0.276771		V	9093100	0.929195		V	7577000	0.351022		V	7094500	0.217997
chrX	7334600	0.591994		V	6910200	0.194466		V	15306100	0.294857		V	9121600	0.566053		V	7596000	0.696453		V	7115900	0.643331
chrX	7364400	0.35242		V	6932300	0.356017		V	15342000	0.234324		V	9147300	0.531879		V	7641400	0.154237		V	7151300	0.783277
chrX	7458200	0.400134		V	6972800	0.193098		V	15389800	0.794829		V	9183000	0.264427		V	7686000	0.288734		V	7220000	0.437223
chrX	7478300	0.735271		V	6996600	0.469247		V	15460700	0.274764		V	9224000	0.764931		V	7738300	0.713478		V	7245100	0.352436
chrX	7504300	0.407203		V	7030800	0.238909		V	15492900	0.532974		V	9249300	0.331888		V	7799800	0.312247		V	7317300	0.22332
chrX	7523000	0.655207		V	7071200	0.40681		V	15516100	0.76466		V	9279100	0.606803		V	7818600	0.630674		V	7437900	0.326184
chrX	7565000	0.732091		V	7097400	0.618265		V	15570400	0.456876		V	9343100	0.655965		V	7852300	0.540712		V	7496100	0.340474
chrX	7664300	0.551116		V	7159000	0.518005		V	15602500	0.41674		V	9381300	0.596595		V	8016300	0.620367		V	7519500	0.391169
chrX	7719400	0.214156		V	7194200	0.520292		V	15647100	0.350722		V	9417400	0.134232		V	8039200	0.536504		V	7638300	0.277518
chrX	7746700	0.534805		V	7226300	0.319369		V	15664300	0.409381		V	9441100	0.326422		V	8072900	0.242373		V	7686600	0.526996
chrX	7786100	0.325436		V	7245000	0.430266		V	15703500	0.40968		V	9502500	0.219833		V	8098500	0.314416		V	7738300	0.577001
chrX	7825300	0.689859		V	7317100	0.442068		V	15750900	0.574263		V	9549400	0.479218		V	8134600	0.447637		V	7799800	0.261019
chrX	7916500	0.785475		V	7390500	0.329004		V	15801100	0.490723		V	9575800	0.527398		V	8216000	0.600788		V	7851900	0.405991
chrX	7963800	0.863159		V	7446600	0.384886		V	15818400	0.434726		V	9625600	0.387476		V	8258800	0.448613		V	7890000	0.234166
chrX	7997100	0.172513		V	7513300	0.537147		V	15866600	0.181979		V	9654200	0.21192		V	8305500	0.65335		V	7969600	0.877961
chrX	8036700	0.268596		V	7555700	0.317675		V	15892300	0.211125		V	9673500	0.258878		V	8345200	0.472246		V	8016700	0.285119
chrX	8106400	0.243801		V	7577100	0.413673		V	15915700	0.245562		V	9698100	0.382791		V	8406500	0.200943		V	8047100	0.382204
chrX	8159000	0.802247		V	7600300	0.626015		V	15956200	0.253765		V	9732300	0.525332		V	8426000	0.243969		V	8070200	0.332288
chrX	8201500	0.511513		V	7661600	0.217378		V	15975200	0.236574		V	9770100	0.307051		V	8451000	0.453456		V	8098700	0.232912
chrX	8271200	0.463872		V	7685900	0.129144		V	16040300	0.943971		V	9800000	0.391106		V	8475700	0.458129		V	8136500	0.186452
chrX	8299200	0.460513		V	7704700	0.124605		V	16100300	0.303593		V	9836700	0.399111		V	8532900	0.593759		V	8210000	0.383456
chrX	8371300	0.227852		V	7739100	0.639943		V	16128100	0.330289		V	9869300	0.287075		V	8596100	0.615949		V	8231300	0.183446
chrX	8392500	0.291454		V	7801800	0.548319		V	16162200	0.634535		V	9923700	0.284175		V	8644400	0.341232		V	8258600	0.501365
chrX	8419300	0.548032		V	7818600	0.534639		V	16179200	0.365164		V	9965400	0.789394		V	8678200	0.443445		V	8293500	0.598797
chrX	8450100	0.249563		V	7851700	0.648208		V	16219000	0.229528		V	10006000	0.764488		V	8735700	0.254598		V	8345200	0.696761
chrX	8552300	0.770928		V	7871700	0.653271		V	16262300	0.382175		V	10039200	0.85889		V	8773800	0.295467		V	8386800	0.2307
chrX	8600800	0.353244		V	7916000	0.291318		V	16288700	0.498774		V	10123200	0.622465		V	8898300	0.777518		V	8406400	0.664595
chrX	8660000	0.836726		V	7943800	0.067231		V	16349500	0.399547		V	10146100	0.494665		V	8942200	0.437678		V	8421800	0.154807
chrX	8737600	0.613088		V	7979600	0.876734		V	16371300	0.749047		V	10169100	0.338587		V	8993100	0.538898		V	8448800	0.500966
chrX	8789300	0.282119		V	8015800	0.361471		V	16399100	0.59278		V	10186700	0.360562		V	9029700	0.43543		V	8477100	0.525847
chrX	8811900	0.714757		V	8038900	0.519088		V	16418500	0.691864		V	10240200	0.692519		V	9090000	0.797696		V	8506200	0.142452
chrX	8859700	0.706537		V	8073100	0.358482		V	16467100	0.511282		V	10272400	0.116397		V	9121300	0.443968		V	8530200	0.556861
chrX	8911700	0.499417		V	8098400	0.46813		V	16498800	0.520033		V	10347800	0.858252		V	9147200	0.520613		V	8596000	0.726561
chrX	8997200	0.159236		V	8134600	0.569569		V	16554700	0.644132		V	10361400	0.769511		V	9183100	0.304921		V	8619900	0.496929
chrX	9067900	0.535188		V	8181100	0.376169		V	16597700	0.386833		V	10440000	0.739707		V	9208300	0.742817		V	8644500	0.347687
chrX	9089000	0.849345		V	8200000	0.52728		V	16622100	0.550628		V	10465100	0.591857		V	9249500	0.471214		V	8674300	0.538251
chrX	9119300	0.347653		V	8222200	0.611357		V	16666200	0.420514		V	10556500	0.546382		V	9274700	0.618816		V	8736400	0.143819
chrX	9146100	0.181589		V	8260800	0.584537		V	16744400	0.825672		V	10597100	0.587165		V	9343400	0.708275		V	8790400	0.624292
chrX	9227200	0.961296		V	8288500	0.726195		V	16769900	0.159179		V	10627500	0.130608		V	9381500	0.635057		V	8914500	0.294352
chrX	9271900	0.34213		V	8305500	0.726195		V	16794700	0.231854		V	10656200	0.290529		V	9441300	0.398495		V	8942200	0.473682
chrX	9342500	0.662803		V	8340800	0.589351		V	16827800	0.405137		V	10677700	0.409686		V	9510500	0.323137		V	8969300	0.289744
chrX	9402800	0.462389		V	8407200	0.321178		V	16871700	0.522486		V	10723700	0.745223		V	9549300	0.655098		V	8994000	0.497971
chrX	9427900	0.116945		V	8426100	0.421186		V	16910600	0.725359		V	10780500	0.344472		V	9578200	0.328892		V	9029400	0.526637
chrX	9449700	0.592023		V	8448900	0.483181		V	16966200	0.627083		V	10809700	0.478461		V	9643800	0.361113		V	9093000	0.859189
chrX	9504900	0.656001		V	8533000	0.82055		V	17016600	0.266331		V	10895200	0.753282		V	9679400	0.529524		V	9121000	0.438603
chrX	9544100	0.289769		V	8598200	0.793888		V	17044300	0.200257		V	10940200	0.700724		V	9696700	0.223694		V	9147400	0.564373
chrX	9603500	0.181897		V	8646500	0.508458		V	17125400	0.963894		V	10967700	0.410937		V	9733600	0.505018		V	9184500	0.33307
chrX	9637200	0.792575		V	8678700	0.440755		V	17199400	0.497248		V	11041600	0.766108		V	9794400	0.505109		V	9209100	0.0814862
chrX	9702700	0.339346		V	8781700	0.881586		V	17213100	0.497248		V	11082000	0.808123		V	9862500	0.462805		V	9251600	0.407647
chrX	9757400	0.365461		V	8804000	0.712955		V	17272200	0.571796		V	11126900	0.531312		V	9923800	0.441908		V	9275200	0.583327
chrX	9775600	0.541599		V	8946500	0.493871		V	17298200	0.25514		V	11181400	0.240979		V	10039100	0.693265		V	9305300	0.20732
chrX	9826200	0.382597		V	8993800	0.523724		V	17321500	0.548399		V	11206700	0.592852		V	10083400	0.234365		V	9348400	0.678061
chrX	9847900	0.70585		V	9029500	0.503149		V	17381100	0.449402		V	11237400	0.383547		V	10141900	0.615008		V	9381300	0.534635
chrX	9932900	0.658289		V	9087800	0.800107		V	17410700	0.440166		V	11283600	0.740476		V	10177300	0.334156		V	9403900	0.595019
chrX	9956200	0.670389		V	9121500	0.64036		V	17440400	0.19538		V	11314000	0.640645		V	10240100	0.639038		V	9442000	0.319475
chrX	9998800	0.644743		V	9147300	0.594768		V	17465500	0.368441		V	11333300	0.858308		V	10272000	0.23478		V	9462900	0.62745
chrX	10052800	0.112322		V	9183000	0.417164		V	17499200	0.726898		V	11373900	0.289971		V	10340500	0.535789		V	9495500	0.361425
chrX	10076300	0.670432		V	9224000	0.811615		V	17534700	0.332979		V	11424900	0.530187		V	10361700	0.72531		V	9549000	0.595327
chrX	10148900	0.746926		V	9248500	0.508049		V	17554400	0.656312		V	11449800	0.385386		V	10401300	0.203653		V	9578100	0.494158
chrX	10208100	0.857601		V	9278500	0.769384		V	17581100	0.944892		V	11485400	0.846576		V	10438700	0.538859		V	9626500	0.414656
chrX	10250400	0.284363		V	9343500	0.731835		V	17624700	0.26317		V	11525500	0.38025		V	10464500	0.330986		V	9676000	0.594863
chrX	10332200	0.727312		V	9381700	0.636045		V	17644600	0.396724		V	11548600	0.379193		V	10485500	0.605986		V	9713300	0.433317
chrX	10395500	0.861389		V	9441100	0.539		V	17677700	0.272192		V	11574600	0.221519		V	10515400	0.269389		V	9739300	0.367797
chrX	10435600	0.49207		V	9510800	0.408335		V	17717500	0.27438		V	11668400	0.83463		V	10537600	0.603809		V	9764300	0.467918
chrX	10518100	0.794209		V	9549100	0.821201		V	17753800	0.253166		V	11701900	0.515509		V	10581800	0.389153		V	9795100	0.159257
chrX	10566700	0.914474		V	9576200	0.522217		V	17787100	0.649509		V	11753300	0.477946		V	10597200	0.598046		V	9844200	0.348786
chrX	10598200	0.654365		V	9625300	0.471698		V	17830700	0.669382		V	11773600	0.737052		V	10622100	0.238101		V	9892000	0.247271
chrX	10627500	0.429299		V	9654000	0.512262		V	17852400	0.322495		V	11831800	0.786594		V	10650900	0.171182		V	9928500	0.166192
chrX	10678000	0.670897		V	9673700	0.225344		V	17928900	0.474768		V	11849300	0.786594		V	10677700	0.417037		V	9973900	0.277499
chrX	10766700	0.714701		V	9696700	0.539975		V	17962000	0.557696		V	11892000	0.570038		V	10713900	0.464587		V	10039000	0.77073
chrX	10845900	0.828855		V	9732000	0.633515		V	17982800	0.64318		V	11951000	0.869417		V	10733900	0.707092		V	10059500	0.635477
chrX	10901500	0.450752		V	9764600	0.23485		V	18020700	0.624083		V	11994700	0.409975		V	10764200	0.46028		V	10083400	0.116841
chrX	10926500	0.777055		V	9791300	0.532637		V	18078300	0.746751		V	12041700	0.778232		V	10780600	0.46028		V	10123000	0.329904
chrX	10992000	0.616526		V	9836600	0.271329		V	18103300	0.636232		V	12078500	0.547168		V	10809400	0.707366		V	10146200	0.239452
chrX	11033200	0.704107		V	9857900	0.333209		V	18140200	0.283094		V	12110900	0.571744		V	10852900	0.468409		V	10168600	0.34623
chrX	11129000	0.625968		V	9877400	0.422865		V	18180600	0.504552		V	12162600	0.230701		V	10898500	0.604259		V	10240800	0.553259
chrX	11191900	0.399145		V	9923700	0.240456		V	18211400	0.342214		V	12182500	0.364723		V	10943500	0.708336		V	10265200	0.525852
chrX	11209800	0.754067		V	9980700	0.289662		V	18254200	0.530414		V	12206900	0.634114		V	10967600	0.566471		V	10362800	0.641241
chrX	11298900	0.866079		V	10005800	0.64251		V	18290100	0.652674		V	12226400	0.757613		V	11006400	0.150863		V	10401600	0.283125
chrX	11346800	0.241091		V	10039000	0.84774		V	18338000	0.450349		V	12254400	0.148766		V	11035400	0.630469		V	10434900	0.243056
chrX	11368800	0.512826		V	10124900	0.689883		V	18367000	0.39071		V	12290000	0.419549		V	11083100	0.318365		V	10454200	0.592786
chrX	11417700	0.41459		V	10139200	0.689883		V	18394800	0.49313		V	12314900	0.358522		V	11126700	0.303312		V	10488600	0.347785
chrX	11442500	0.280433		V	10215500	0.278846		V	18421000	0.650465		V	12343400	0.161579		V	11181200	0.229856		V	10515600	0.296248
chrX	11521400	0.517273		V	10239900	0.702621		V	18461700	0.586724		V	12363300	0.413169		V	11206500	0.305949		V	10537900	0.38026
chrX	11556100	0.553412		V	10275700	0.561898		V	18487900	0.668684		V	12404600	0.750854		V	11238800	0.506035		V	10581700	0.301772
chrX	11603600	0.814444		V	10342800	0.815299		V	18542500	0.182928		V	12465000	0.588661		V	11283500	0.644377		V	10621900	0.223519
chrX	11667000	0.569127		V	10361800	0.841895		V	18589200	0.879463		V	12527400	0.476551		V	11309500	0.360366		V	10650200	0.147779
chrX	11759800	0.420894		V	10401600	0.258872		V	18614300	0.454187		V	12551500	0.579345		V	11333200	0.585662		V	10678100	0.389596
chrX	11798300	0.737527		V	10440200	0.297479		V	18703300	0.615625		V	12579400	0.48349		V	11380600	0.194583		V	10714100	0.59912
chrX	11842700	0.314413		V	10465200	0.587232		V	18728400	0.578857		V	12641900	0.72636		V	11403200	0.228875		V	10734000	0.753534
chrX	11899100	0.272133		V	10485500	0.638424		V	18782300	0.250101		V	12718500	0.0764818		V	11430500	0.111413		V	10764000	0.203018
chrX	11938700	0.840124		V	10532500	0.542309		V	18806300	0.80012		V	12737100	0.221049		V	11491500	0.552156		V	10784400	0.2317
chrX	11981000	0.331757		V	10556500	0.609298		V	18863900	0.621784		V	12762700	0.53341		V	11519500	0.338595		V	10808600	0.328619
chrX	12057400	0.262686		V	10597100	0.599723		V	18901700	0.718076		V	12800400	0.661827		V	11548400	0.24507		V	10826800	0.632783
chrX	12088400	0.498761		V	10630900	0.537798		V	18944100	0.192876		V	12818800	0.590383		V	11569900	0.243573		V	10855000	0.391496
chrX	12174700	0.77095		V	10656300	0.314071		V	18979800	0.76542		V	12863600	0.577698		V	11643500	0.246963		V	10899300	0.547325
chrX	12199400	0.650014		V	10677700	0.620981		V	19009200	0.443558		V	12906900	0.718212		V	11672800	0.682486		V	10945900	0.813194
chrX	12232300	0.274187		V	10733700	0.836771		V	19044400	0.188568		V	12952100	0.239623		V	11702000	0.459037		V	10975500	0.284877
chrX	12294800	0.130129		V	10771300	0.412426		V	19079700	0.438865		V	12991400	0.2345		V	11731500	0.205589		V	11035500	0.603714
chrX	12320300	0.406626		V	10809800	0.701181		V	19104800	0.654625		V	13020800	0.616464		V	11770100	0.680592		V	11084800	0.263011
chrX	12393700	0.502669		V	10895300	0.855822		V	19126200	0.468472		V	13057900	0.218043		V	11845100	0.659949		V	11127100	0.539002
chrX	12410100	0.617132		V	10940600	0.642423		V	19158300	0.511418		V	13080600	0.716086		V	11896100	0.678614		V	11216100	0.543856
chrX	12452500	0.522003		V	10967200	0.535168		V	19190800	0.658453		V	13115500	0.216761		V	11951600	0.740967		V	11234000	0.678005
chrX	12506800	0.749021		V	11041800	0.77414		V	19218600	0.437621		V	13159000	0.79261		V	11994300	0.598823		V	11283500	0.54506
chrX	12602200	0.363347		V	11078200	0.664572		V	19241900	0.70496		V	13200500	0.325862		V	12041400	0.762294		V	11308800	0.291303
chrX	12638000	0.320066		V	11126800	0.557657		V	19267600	0.467752		V	13262100	0.435796		V	12078600	0.620067		V	11333600	0.741156
chrX	12682400	0.825324		V	11175500	0.781526		V	19356000	0.304135		V	13293200	0.872359		V	12112700	0.611941		V	11380700	0.259615
chrX	12728700	0.227624		V	11202900	0.608126		V	19376300	0.468033		V	13398100	0.816092		V	12158600	0.435479		V	11409900	0.253302
chrX	12763500	0.222057		V	11234000	0.513024		V	19405300	0.591329		V	13466000	0.384959		V	12184600	0.367429		V	11521300	0.203787
chrX	12856500	0.755291		V	11284000	0.716554		V	19433100	0.526011		V	13490000	0.487026		V	12208700	0.35689		V	11547900	0.421064
chrX	12931600	0.646196		V	11310200	0.486398		V	19476300	0.15615		V	13515300	0.537145		V	12227400	0.57705		V	11570700	0.234674
chrX	12989400	0.57755		V	11333400	0.842909		V	19501500	0.31475		V	13559000	0.656577		V	12278800	0.197708		V	11618800	0.251738
chrX	13014000	0.672756		V	11373900	0.342825		V	19528200	0.896517		V	13577800	0.729054		V	12315900	0.270484		V	11641300	0.348666
chrX	13052100	0.363179		V	11397600	0.493084		V	19601000	0.233334		V	13658900	0.855315		V	12341900	0.2795		V	11672300	0.773355
chrX	13120800	0.280496		V	11427000	0.436598		V	19625200	0.680086		V	13710100	0.288919		V	12372100	0.445073		V	11697900	0.303187
chrX	13146000	0.614527		V	11449500	0.45492		V	19668100	0.225379		V	13753700	0.193188		V	12404800	0.427764		V	11774700	0.420796
chrX	13170000	0.67994		V	11491400	0.461552		V	19711000	0.597388		V	13811900	0.783347		V	12464900	0.322202		V	11843200	0.481023
chrX	13226200	0.656397		V	11524800	0.377148		V	19737700	0.444417		V	13885400	0.420315		V	12527600	0.193503		V	11872100	0.190364
chrX	13252200	0.446931		V	11548500	0.229172		V	19776500	0.394093		V	13916300	0.30739		V	12552000	0.315491		V	11890900	0.689035
chrX	13328900	0.274123		V	11571700	0.314383		V	19833400	0.184721		V	13945700	0.213317		V	12577200	0.139193		V	11953300	0.826496
chrX	13360300	0.358456		V	11643700	0.298503		V	19879700	0.400677		V	13962900	0.483634		V	12597700	0.408199		V	12005400	0.57965
chrX	13419400	0.240619		V	11672800	0.73542		V	19900500	0.692704		V	14013100	0.489322		V	12641800	0.392166		V	12041400	0.691078
chrX	13440200	0.503489		V	11701900	0.472957		V	20006800	0.838612		V	14039200	0.575232		V	12669700	0.412154		V	12078500	0.586255
chrX	13525000	0.867937		V	11734600	0.275198		V	20072100	0.811369		V	14058200	0.634921		V	12695600	0.197426		V	12115000	0.543613
chrX	13582900	0.738517		V	11770000	0.786205		V	20128900	0.600328		V	14101700	0.639363		V	12741800	0.159118		V	12158000	0.479753
chrX	13744800	0.4904		V	11828400	0.431562		V	20172200	0.148987		V	14136500	0.510545		V	12763200	0.390788		V	12182600	0.226415
chrX	13812900	0.414789		V	11849200	0.711136		V	20198200	0.462616		V	14233600	0.355399		V	12790600	0.390952		V	12209600	0.742488
chrX	13857900	0.294655		V	11873200	0.28525		V	20251500	0.409875		V	14284500	0.388867		V	12818900	0.512207		V	12226700	0.712066
chrX	13888100	0.780828		V	11895800	0.683751		V	20275800	0.470595		V	14326200	0.781209		V	12861100	0.41238		V	12279500	0.169398
chrX	13945900	0.329827		V	11951000	0.84463		V	20292500	0.470595		V	14343600	0.343193		V	12903100	0.62309		V	12308000	0.239247
chrX	13971800	0.635297		V	11994500	0.636494		V	20344500	0.907254		V	14367000	0.196628		V	12951800	0.444075		V	12372100	0.562955
chrX	14002400	0.217014		V	12041700	0.851201		V	20374100	0.311322		V	14433800	0.879653		V	12970600	0.497018		V	12405000	0.455779
chrX	14027300	0.566216		V	12077800	0.643687		V	20427900	0.759679		V	14498800	0.721086		V	13020300	0.518172		V	12447000	0.695034
chrX	14101500	0.621449		V	12110900	0.595702		V	20457300	0.311669		V	14520000	0.572895		V	13091400	0.385842		V	12464800	0.576136
chrX	14177200	0.42871		V	12158400	0.312411		V	20478500	0.666185		V	14598000	0.274484		V	13115600	0.245689		V	12480400	0.476907
chrX	14191900	0.647431		V	12184900	0.535996		V	20530300	0.555627		V	14643200	0.435953		V	13156500	0.456409		V	12547900	0.561453
chrX	14242800	0.596391		V	12207300	0.528811		V	20574600	0.353174		V	14674200	0.464335		V	13241600	0.127585		V	12577200	0.374314
chrX	14297800	0.415037		V	12227400	0.601415		V	20653000	0.911083		V	14697600	0.584445		V	13261600	0.552906		V	12643500	0.64964
chrX	14337900	0.445907		V	12254200	0.173042		V	20678400	0.309664		V	14794100	0.470216		V	13289200	0.197436		V	12669700	0.443792
chrX	14446000	0.685164		V	12291900	0.514199		V	20710100	0.46885		V	14838700	0.662955		V	13399200	0.650051		V	12700000	0.270468
chrX	14485800	0.849511		V	12315500	0.439446		V	20745500	0.342891		V	14929500	0.550208		V	13416300	0.627724		V	12741700	0.362523
chrX	14506500	0.91485		V	12343300	0.301601		V	20776200	0.543227		V	14957500	0.168266		V	13466000	0.581007		V	12762900	0.359657
chrX	14603000	0.708008		V	12369900	0.518876		V	20837400	0.509597		V	15002600	0.757683		V	13491000	0.243438		V	12789600	0.327103
chrX	14636100	0.256248		V	12408500	0.699202		V	20871300	0.369773		V	15062500	0.680714		V	13517600	0.359946		V	12809900	0.692413
chrX	14654800	0.557265		V	12464900	0.74333		V	20903100	0.115134		V	15092200	0.330073		V	13558800	0.460718		V	12860900	0.481648
chrX	14703400	0.649765		V	12498300	0.309139		X	42600	0.749003		V	15149100	0.642326		V	13577800	0.629174		V	12900000	0.650546
chrX	14757700	0.660828		V	12528000	0.469211		X	101700	0.555876		V	15189100	0.487264		V	13659200	0.520017		V	12948100	0.537074
chrX	14816700	0.419769		V	12577400	0.204105		X	120800	0.37358		V	15240300	0.349486		V	13720000	0.600975		V	13021900	0.69722
chrX	14842200	0.57761		V	12599700	0.466065		X	148600	0.710945		V	15260500	0.204416		V	13814400	0.716835		V	13057900	0.264289
chrX	14877700	0.104405		V	12642200	0.632613		X	173600	0.594144		V	15305500	0.207745		V	13887600	0.591743		V	13091900	0.293327
chrX	14949500	0.588044		V	12662800	0.678211		X	209700	0.729931		V	15368600	0.318318		V	13920600	0.3305		V	13116700	0.279003
chrX	14979700	0.509322		V	12734100	0.268021		X	234000	0.930187		V	15393600	0.6009		V	13945800	0.145542		V	13148700	0.556903
chrX	15042100	0.604711		V	12762800	0.637217		X	319800	0.691123		V	15460800	0.391267		V	14013200	0.509641		V	13191500	0.260679
chrX	15182200	0.668318		V	12795900	0.439505		X	342900	0.478787		V	15495500	0.413362		V	14039300	-0.0573406		V	13220200	0.371615
chrX	15248500	0.434352		V	12820000	0.444852		X	392200	0.645434		V	15516000	0.740934		V	14058200	0.674096		V	13258600	0.199171
chrX	15280800	0.699954		V	12863500	0.75947		X	424300	0.360641		V	15546200	0.419608		V	14091400	0.414781		V	13289400	0.336615
chrX	15346000	0.828215		V	12907200	0.723379		X	442000	0.323314		V	15570300	0.456156		V	14108700	0.60256		V	13325200	0.200299
chrX	15436600	0.371103		V	12951700	0.497717		X	468400	0.360828		V	15645500	0.274269		V	14136500	0.568649		V	13377300	0.501606
chrX	15508700	0.589588		V	12991100	0.530121		X	497100	0.524227		V	15670800	0.18014		V	14177000	0.381028		V	13399300	0.60072
chrX	15548800	0.326925		V	13024900	0.595378		X	533100	0.292219		V	15705400	0.454397		V	14206500	0.349154		V	13416400	0.548929
chrX	15603800	0.783711		V	13084100	0.72428		X	595800	0.920619		V	15750800	0.735829		V	14223300	0.326428		V	13448100	0.29537
chrX	15683000	0.307588		V	13115500	0.270735		X	693500	0.821221		V	15795900	0.382279		V	14276600	0.447832		V	13468400	0.554883
chrX	15705600	0.480289		V	13157300	0.813381		X	728200	0.28219		V	15818600	0.361126		V	14323500	0.130361		V	13493000	0.297533
chrX	15725700	0.672443		V	13200800	0.403511		X	768900	0.462084		V	15866500	0.209029		V	14343700	0.624955		V	13521400	0.34188
chrX	15799200	0.322785		V	13261800	0.653414		X	794900	0.533192		V	15891900	0.336899		V	14426000	0.728459		V	13535800	0.498235
chrX	15841800	0.414752		V	13293300	0.839986		X	829100	0.538485		V	15913400	0.361593		V	14467100	0.153414		V	13558900	0.550216
chrX	15867500	0.480301		V	13377100	0.36745		X	872700	0.649618		V	15953100	0.330571		V	14499100	0.290729		V	13574600	0.4978
chrX	15919600	0.18781		V	13399600	0.69194		X	938800	0.193129		V	15975000	0.284477		V	14520800	0.380533		V	13658800	0.5618
chrX	15945500	0.122213		V	13465700	0.611988		X	980000	0.287057		V	15996600	0.117684		V	14598300	0.326368		V	13687100	0.42324
chrX	15986200	0.368691		V	13490300	0.459478		X	1020700	0.520781		V	16040300	0.925621		V	14644400	0.47176		V	13725000	0.60064
chrX	16041800	0.363707		V	13515300	0.504239		X	1043600	0.367546		V	16100400	0.336532		V	14703500	0.555042		V	13767200	0.112229
chrX	16150500	0.921893		V	13559000	0.756553		X	1101700	0.623821		V	16128100	0.301165		V	14733000	0.395349		V	13791800	0.4633
chrX	16187400	0.122286		V	13630700	0.140309		X	1124900	0.757086		V	16162600	0.709672		V	14762700	0.207055		V	13813900	0.689339
[truncated: 669 more rows]

## Sheet: Sheet2
chrI	17300	0.73714
chrI	65400	0.644572
chrI	109800	0.69038
chrI	128300	0.69038
chrI	181400	0.549461
chrI	220100	0.481556
chrI	274300	0.776648
chrI	316900	0.771795
chrI	397500	0.793477
chrI	440800	0.84056
chrI	516800	0.790631
chrI	537400	0.788566
chrI	607300	0.634076
chrI	630600	0.813954
chrI	649100	0.813954
chrI	720700	0.843522
chrI	812700	0.72699
chrI	846100	0.500967
chrI	898500	0.553174
chrI	920300	0.426785
chrI	959100	0.870716
chrI	1034500	0.791946
chrI	1069100	0.630355
chrI	1108400	0.544548
chrI	1133000	0.766102
chrI	1156900	0.710787
chrI	1198200	0.539237
chrI	1229900	0.598153
chrI	1248700	0.598153
chrI	1295600	0.650769
chrI	1340700	0.759682
chrI	1379200	0.738966
chrI	1401700	0.675222
chrI	1440500	0.693266
chrI	1514300	0.627278
chrI	1559100	0.754813
chrI	1580800	0.613864
chrI	1651000	0.786012
chrI	1696400	0.861712
chrI	1719400	0.627961
chrI	1745600	0.242765
chrI	1834900	0.91572
chrI	1870100	0.345378
chrI	1895600	0.294144
chrI	1945000	0.56098
chrI	1977500	0.751127
chrI	2036400	0.830443
chrI	2070300	0.898966
chrI	2095100	0.569314
chrI	2154700	0.876912
chrI	2181600	0.414906
chrI	2292900	0.917351
chrI	2317500	0.688835
chrI	2342500	0.376677
chrI	2401500	0.716095
chrI	2434300	0.608264
chrI	2492300	0.492504
chrI	2512400	0.491744
chrI	2591900	0.722466
chrI	2631700	0.698217
chrI	2708500	0.873076
chrI	2732400	0.767097
chrI	2750200	0.726347
chrI	2832400	0.933965
chrI	2886800	0.80357
chrI	2929500	0.499146
chrI	2965700	0.730693
chrI	3033700	0.609461
chrI	3100900	0.698184
chrI	3157600	0.686596
chrI	3217800	0.688652
chrI	3266600	0.543672
chrI	3336800	0.801666
chrI	3409300	0.720528
chrI	3465700	0.686969
chrI	3502300	0.673797
chrI	3553600	0.666415
chrI	3604100	0.865823
chrI	3639300	0.402442
chrI	3723100	0.799361
chrI	3788600	0.711638
chrI	3831500	0.793259
chrI	3868200	0.554748
chrI	3908000	0.478147
chrI	3958200	0.857072
chrI	3998300	0.767152
chrI	4034300	0.748824
chrI	4139600	0.900092
chrI	4178300	0.7081
chrI	4198900	0.736227
chrI	4257300	0.574455
chrI	4298000	0.938708
chrI	4319300	0.78064
chrI	4382100	0.781474
chrI	4427000	0.697311
chrI	4452900	0.707509
chrI	4494100	0.634263
chrI	4535900	0.699257
chrI	4584000	0.874615
chrI	4654300	0.864829
chrI	4701200	0.860139
chrI	4752200	0.794983
chrI	4766100	0.794983
chrI	4790600	0.603716
chrI	4827000	0.367007
chrI	4847900	0.383735
chrI	4910200	0.866642
chrI	4932800	0.854326
chrI	4971500	0.614345
chrI	4994200	0.614345
chrI	5080000	0.772809
chrI	5134400	0.681628
chrI	5165100	0.726346
chrI	5222300	0.606535
chrI	5290800	0.756939
chrI	5315400	0.772931
chrI	5355100	0.435391
chrI	5376300	0.426097
chrI	5422900	0.717062
chrI	5486100	0.72745
chrI	5516400	0.524813
chrI	5547600	0.551082
chrI	5595800	0.703722
chrI	5620400	0.59973
chrI	5661700	0.699582
chrI	5697400	0.623919
chrI	5743600	0.480172
chrI	5822200	0.787797
chrI	5870700	0.63066
chrI	5930200	0.386933
chrI	5983000	0.797918
chrI	6000700	0.797918
chrI	6077500	0.775654
chrI	6152300	0.898285
chrI	6173200	0.864102
chrI	6219100	0.547173
chrI	6236100	0.579155
chrI	6284500	0.897021
chrI	6342200	0.493349
chrI	6372400	0.557708
chrI	6415700	0.542819
chrI	6458000	0.781317
chrI	6490200	0.403041
chrI	6580100	0.717627
chrI	6613700	0.282998
chrI	6717600	0.88955
chrI	6745600	0.725275
chrI	6799900	0.578369
chrI	6847500	0.459209
chrI	6883000	0.652925
chrI	6923800	0.652374
chrI	6950200	0.559555
chrI	6998200	0.75557
chrI	7023100	0.714956
chrI	7085100	0.874417
chrI	7151800	0.624692
chrI	7192800	0.837613
chrI	7251600	0.487041
chrI	7315600	0.736298
chrI	7348800	0.355017
chrI	7471900	0.962331
chrI	7495800	0.835354
chrI	7519200	0.590493
chrI	7546000	0.677762
chrI	7591100	0.397848
chrI	7653000	0.748368
chrI	7714900	0.833196
chrI	7776100	0.65133
chrI	7865900	0.717565
chrI	7940800	0.864116
chrI	7969300	0.475305
chrI	8049600	0.830741
chrI	8135500	0.769832
chrI	8225100	0.836763
chrI	8287400	0.74026
chrI	8329500	0.509893
chrI	8412500	0.797412
chrI	8433400	0.749783
chrI	8485300	0.77087
chrI	8513400	0.632233
chrI	8569800	0.749822
chrI	8600100	0.587782
chrI	8636500	0.703702
chrI	8696400	0.684962
chrI	8726100	0.619639
chrI	8762700	0.725727
chrI	8788500	0.502811
chrI	8813200	0.572337
chrI	8845300	0.398988
chrI	8865300	0.379751
chrI	8916600	0.581376
chrI	8959800	0.757917
chrI	8980100	0.679605
chrI	9015000	0.668446
chrI	9042200	0.67484
chrI	9099800	0.69216
chrI	9125400	0.544864
chrI	9163700	0.653927
chrI	9248400	0.579908
chrI	9296900	0.693631
chrI	9313500	0.689282
chrI	9375700	0.872453
chrI	9414500	0.642774
chrI	9446900	0.575906
chrI	9473800	0.582025
chrI	9516400	0.472832
chrI	9545700	0.645716
chrI	9583800	0.415923
chrI	9623600	0.646443
chrI	9660700	0.514394
chrI	9730700	0.836999
chrI	9788300	0.71915
chrI	9857200	0.915146
chrI	9903100	0.744964
chrI	9938700	0.515692
chrI	9987300	0.789086
chrI	10036700	0.419757
chrI	10076500	0.550562
chrI	10181200	0.839086
chrI	10235300	0.857455
chrI	10294600	0.840552
chrI	10335300	0.754079
chrI	10371300	0.596917
chrI	10435800	0.842258
chrI	10477900	0.697282
chrI	10562800	0.82401
chrI	10590800	0.503628
chrI	10636600	0.451516
chrI	10668900	0.568468
chrI	10687000	0.568468
chrI	10725500	0.708108
chrI	10771900	0.821562
chrI	10821500	0.771018
chrI	10900600	0.483978
chrI	10933600	0.433611
chrI	10962900	0.782777
chrI	10991200	0.648417
chrI	11060600	0.881949
chrI	11098100	0.905615
chrI	11124800	0.458947
chrI	11167800	0.847422
chrI	11203000	0.862652
chrI	11292400	0.514827
chrI	11359300	0.667672
chrI	11399100	0.489104
chrI	11418000	0.517289
chrI	11447200	0.591482
chrI	11480500	0.791519
chrI	11512500	0.79837
chrI	11555400	0.81931
chrI	11588900	0.737627
chrI	11609900	0.720651
chrI	11668000	0.78088
chrI	11792400	0.924341
chrI	11821300	0.49388
chrI	11872200	0.88253
chrI	11912000	0.545109
chrI	11931900	0.523825
chrI	12006100	0.62149
chrI	12043000	0.858359
chrI	12065300	0.74836
chrI	12145400	0.755451
chrI	12194000	0.767541
chrI	12229000	0.545139
chrI	12284300	0.639076
chrI	12332900	0.587763
chrI	12425900	0.795191
chrI	12482400	0.872386
chrI	12532300	0.652861
chrI	12597800	0.804553
chrI	12627600	0.412332
chrI	12661100	0.817341
chrI	12736700	0.837055
chrI	12815700	0.847224
chrI	12917900	0.761597
chrI	12965700	0.779762
chrI	12990100	0.607169
chrI	13035100	0.607817
chrI	13060700	0.462736
chrI	13096300	0.54208
chrI	13158900	0.722354
chrI	13241100	0.930636
chrI	13264900	0.794196
chrI	13335700	0.775632
chrI	13373700	0.636922
chrI	13411600	0.707597
chrI	13425600	0.707597
chrI	13501400	0.781448
chrI	13534200	0.515049
chrI	13569900	0.560001
chrI	13590000	0.533318
chrI	13629300	0.904162
chrI	13659800	0.683617
chrI	13686100	0.311711
chrI	13747000	0.619585
chrI	13815600	0.800596
chrI	13844500	0.773757
chrI	13949400	0.794728
chrI	13973000	0.763826
chrI	13993500	0.761633
chrI	14086800	0.867725
chrI	14144300	0.789902
chrI	14228900	0.747788
chrI	14306300	0.822943
chrI	14373100	0.5585
chrI	14398000	0.606195
chrI	14425200	0.618034
chrI	14469800	0.760187
chrI	14523600	0.736777
chrI	14611800	0.751762
chrI	14647700	0.611985
chrI	14711000	0.755311
chrI	14734300	0.725238
chrI	14757100	0.654204
chrI	14809700	0.604823
chrI	14839300	0.38955
chrI	14867000	0.321825
chrI	14900000	0.616165
chrI	14957800	0.876777
chrI	15035300	0.856796
chrII	22800	0.641145
chrII	44000	0.6061
chrII	68900	0.557742
chrII	95200	0.580249
chrII	222100	0.673865
chrII	259400	0.608249
chrII	313500	0.77055
chrII	350400	0.400943
chrII	384100	0.697636
chrII	430700	0.828655
chrII	455800	0.612012
chrII	480800	0.426368
chrII	535000	0.810543
chrII	583500	0.777479
chrII	604400	0.777479
chrII	629500	0.549081
chrII	715600	0.45045
chrII	742500	0.449978
chrII	870100	0.913506
chrII	914300	0.862231
chrII	933600	0.860956
chrII	957500	0.686353
chrII	991800	0.57622
chrII	1051400	0.650555
chrII	1135100	0.702695
chrII	1156300	0.582156
chrII	1210900	0.684531
chrII	1245100	0.594497
chrII	1296100	0.818312
chrII	1320400	0.738907
chrII	1400900	0.634299
chrII	1419900	0.646838
chrII	1445200	0.575092
chrII	1503100	0.71186
chrII	1538000	0.702327
chrII	1657500	0.895326
chrII	1684200	0.568785
chrII	1721000	0.66557
chrII	1754700	0.776187
chrII	1789500	0.701243
chrII	1819900	0.35309
chrII	1862400	0.473582
chrII	1926200	0.610798
chrII	1985800	1
chrII	2061000	0.847018
chrII	2093000	0.784583
chrII	2137900	0.926267
chrII	2199100	0.634353
chrII	2227000	0.659034
chrII	2296000	0.84606
chrII	2352100	0.632732
chrII	2433100	0.913497
chrII	2452200	0.907988
chrII	2488000	0.599688
chrII	2563200	0.511927
chrII	2587700	0.563838
chrII	2640100	0.826459
chrII	2661400	0.810366
chrII	2769400	0.848124
chrII	2810900	0.648222
chrII	2833500	0.587811
chrII	2882400	0.498611
chrII	2926800	0.513382
chrII	2964700	0.822966
chrII	2995100	0.819089
chrII	3055600	0.74182
chrII	3083500	0.446871
chrII	3119400	0.405578
chrII	3184400	0.691381
chrII	3310200	0.820111
chrII	3374800	0.738353
chrII	3485100	0.867305
chrII	3522400	0.676996
chrII	3549400	0.55158
chrII	3594400	0.664698
chrII	3653300	0.760096
chrII	3679100	0.61062
chrII	3744100	0.599926
chrII	3783500	0.56043
chrII	3812000	0.633123
chrII	3895000	0.89073
chrII	3956700	0.913839
chrII	4006700	0.436448
chrII	4045900	0.668042
chrII	4097700	0.757437
chrII	4129700	0.621996
chrII	4152200	0.590623
chrII	4213400	0.594115
chrII	4231200	0.594115
chrII	4288000	0.782131
chrII	4315400	0.645324
chrII	4376700	0.770323
chrII	4418100	0.55064
chrII	4462600	0.524678
chrII	4508300	0.766559
chrII	4574500	0.893851
chrII	4602800	0.376047
chrII	4673500	0.905755
chrII	4699400	0.665645
chrII	4742300	0.394656
chrII	4823400	0.79954
chrII	4851800	0.449354
chrII	4909200	0.756322
chrII	4949100	0.760609
chrII	4984600	0.750714
chrII	5021000	0.664355
chrII	5049800	0.717786
chrII	5082300	0.396072
chrII	5182000	0.91213
chrII	5227700	0.804903
chrII	5340500	0.898964
chrII	5380600	0.624221
chrII	5423000	0.643951
chrII	5462400	0.701342
chrII	5501400	0.399825
chrII	5528900	0.445236
chrII	5593300	0.824679
chrII	5664600	0.700152
chrII	5715300	0.691465
chrII	5736400	0.624943
chrII	5783500	0.484042
chrII	5840100	0.666326
chrII	5878900	0.767603
chrII	5933000	0.713747
chrII	6048700	0.698771
chrII	6114800	0.701929
chrII	6188500	0.740771
chrII	6247600	0.716121
chrII	6269500	0.669612
chrII	6333400	0.881121
chrII	6352300	0.865787
chrII	6415700	0.74084
chrII	6444900	0.423986
chrII	6491400	0.82823
chrII	6521700	0.793942
chrII	6563100	0.513525
chrII	6592600	0.584924
chrII	6680500	0.845427
chrII	6734400	0.616059
chrII	6778800	0.925991
chrII	6833900	0.925024
chrII	6859000	0.517393
chrII	6934100	0.872332
chrII	6975000	0.417666
chrII	7029900	0.709553
chrII	7050500	0.596807
chrII	7084200	0.750892
chrII	7116500	0.416455
chrII	7148700	0.365289
chrII	7201100	0.407413
chrII	7251600	0.751882
chrII	7302100	0.784251
chrII	7382000	0.674381
chrII	7442400	0.540788
chrII	7459600	0.540788
chrII	7478600	0.446256
chrII	7538300	0.839255
chrII	7570900	0.685113
chrII	7599300	0.483235
chrII	7618100	0.483235
chrII	7667900	0.771523
chrII	7702800	0.362028
chrII	7763100	0.789479
chrII	7783800	0.76007
chrII	7813900	0.779828
chrII	7860800	0.647505
chrII	7893900	0.383548
chrII	8028000	0.913324
chrII	8053100	0.745851
chrII	8093000	0.637617
chrII	8129400	0.814404
chrII	8222900	0.67648
chrII	8276200	0.405924
chrII	8326700	0.879597
chrII	8412700	0.922362
chrII	8456800	0.386232
chrII	8481700	0.37501
chrII	8569200	0.779528
chrII	8602600	0.553711
chrII	8653200	0.637283
chrII	8692500	0.560373
chrII	8764800	0.798247
chrII	8788000	0.704171
chrII	8811200	0.657915
chrII	8846800	0.627431
chrII	8896700	0.909736
chrII	8925700	0.429846
chrII	8966100	0.523431
chrII	9061400	0.918892
chrII	9093200	0.30483
chrII	9177400	0.75889
chrII	9215300	0.661899
chrII	9265600	0.860997
chrII	9309000	0.66346
chrII	9356000	0.420237
chrII	9490800	0.907825
chrII	9573800	0.813325
chrII	9610500	0.668738
chrII	9646800	0.779808
chrII	9717700	0.748455
chrII	9770800	0.429735
chrII	9839200	1
chrII	9894800	0.804212
chrII	9931600	0.595238
chrII	9966700	0.61807
chrII	10035500	0.878735
chrII	10070700	0.862786
chrII	10147500	0.773185
chrII	10172200	0.759975
chrII	10209200	0.515659
chrII	10247500	0.496583
chrII	10297600	0.572481
chrII	10350900	0.898245
chrII	10375600	0.718781
chrII	10414800	0.425113
chrII	10446300	0.650225
chrII	10503700	0.877914
chrII	10549100	0.90935
chrII	10658500	0.735458
chrII	10693600	0.420981
chrII	10784800	0.906932
chrII	10824200	0.487051
chrII	10860400	0.553684
chrII	10879800	0.503617
chrII	10947100	0.881868
chrII	10989400	0.863968
chrII	11042200	0.81252
chrII	11098000	0.655395
chrII	11127100	0.404488
chrII	11180900	0.509618
chrII	11236600	0.850815
chrII	11286400	0.838206
chrII	11347100	0.46891
chrII	11396100	0.70033
chrII	11450000	0.774426
chrII	11536500	0.937035
chrII	11569400	0.573778
chrII	11632600	0.89018
chrII	11682500	0.650544
chrII	11725000	0.700561
chrII	11750200	0.777739
chrII	11792300	0.435354
chrII	11883900	0.876175
chrII	11917500	0.264147
chrII	11976600	0.75051
chrII	12006700	0.519136
chrII	12037500	0.392453
chrII	12090200	0.647904
chrII	12113600	0.644077
chrII	12147500	0.55597
chrII	12189300	0.773845
chrII	12224200	0.747436
chrII	12264500	0.56299
chrII	12290100	0.332055
chrII	12354300	0.779423
chrII	12409600	0.558884
chrII	12460500	0.700335
chrII	12516400	0.491347
chrII	12551900	0.56123
chrII	12578000	0.66462
chrII	12603500	0.704448
chrII	12677700	0.879276
chrII	12756600	0.860221
chrII	12802500	0.754317
chrII	12874800	0.628318
chrII	12914900	0.761987
chrII	12986100	0.923638
chrII	13018300	0.498301
chrII	13037100	0.497427
chrII	13082400	0.392991
chrII	13116700	0.563519
chrII	13165400	0.729193
chrII	13196600	0.716146
chrII	13293400	0.835436
chrII	13335500	0.827568
chrII	13369000	0.276788
chrII	13461400	0.792836
chrII	13541500	0.665798
chrII	13589500	0.708256
chrII	13641000	0.684982
chrII	13695300	0.811788
chrII	13737200	0.90431
chrII	13818900	0.919994
chrII	13841800	0.911575
chrII	13858900	0.289931
chrII	13888300	0.491814
chrII	13904800	0.491814
chrII	13969300	0.571054
chrII	14020100	0.86239
chrII	14042900	0.830752
chrII	14063200	0.77725
chrII	14150800	0.883617
chrII	14187300	0.864122
chrII	14248800	0.854051
chrII	14297000	0.195624
chrII	14317100	0.183144
chrII	14357300	0.94738
chrII	14405900	0.715356
chrII	14437900	0.538057
chrII	14494300	0.484915
chrII	14568300	0.607848
chrII	14642800	0.709971
chrII	14698100	0.770714
chrII	14724200	1
chrII	14755300	0.673774
chrII	14814900	0.877542
chrII	14888700	0.574662
chrII	14964300	0.768348
chrII	15010300	0.641112
chrII	15053700	0.424759
chrII	15081500	0.648495
chrII	15129100	0.651662
chrII	15231100	0.832966
chrII	15262800	0.770401
chrIII	3100	0.84519
chrIII	20900	0.84519
chrIII	96400	0.757702
chrIII	146100	0.644432
chrIII	177800	0.823949
chrIII	215900	0.421536
chrIII	235500	0.418677
chrIII	301500	0.746097
chrIII	355000	0.935735
chrIII	429000	0.823675
chrIII	486300	0.675231
chrIII	558800	0.759462
chrIII	606900	0.591403
chrIII	635100	0.506065
chrIII	657300	0.466866
chrIII	725100	0.592951
chrIII	791600	0.864232
chrIII	836200	0.864673
chrIII	870800	0.709622
chrIII	906400	0.289107
chrIII	954900	0.804142
chrIII	981500	0.694312
chrIII	1053600	0.813652
chrIII	1081400	0.684089
chrIII	1159400	0.620373
chrIII	1214200	0.705212
chrIII	1233000	0.665299
chrIII	1254000	0.322708
chrIII	1326600	0.65647
chrIII	1345100	0.65647
chrIII	1423300	0.88792
chrIII	1457300	0.819519
chrIII	1547800	0.623613
chrIII	1618900	0.708757
chrIII	1679500	0.473506
chrIII	1701800	0.457023
chrIII	1738600	0.670448
chrIII	1764300	0.727119
chrIII	1821900	0.683904
chrIII	1853400	0.619833
chrIII	1921600	0.878366
chrIII	1950700	0.374873
chrIII	1995600	0.413833
chrIII	2026900	0.484999
chrIII	2100900	0.810428
chrIII	2125900	0.709916
chrIII	2162900	0.880542
chrIII	2234300	0.803401
chrIII	2306200	0.700042
chrIII	2330700	0.614178
chrIII	2375800	0.691133
chrIII	2424500	0.680107
chrIII	2475700	0.619806
chrIII	2507600	0.775447
chrIII	2532800	0.794545
chrIII	2577400	0.687321
chrIII	2614200	0.410907
chrIII	2654100	0.483128
chrIII	2685600	0.64192
chrIII	2726500	0.668665
chrIII	2765100	0.793262
chrIII	2788300	0.793065
chrIII	2875300	0.698558
chrIII	2909800	0.741679
chrIII	2947400	0.757201
chrIII	2978700	0.628332
chrIII	3036700	0.80031
chrIII	3070400	0.613543
chrIII	3132800	0.527792
chrIII	3163900	0.583411
chrIII	3271800	0.702966
chrIII	3320900	0.627401
chrIII	3396800	0.866621
chrIII	3464600	0.797279
chrIII	3509500	0.689362
chrIII	3538100	0.565909
chrIII	3624100	0.878991
chrIII	3706400	0.669515
chrIII	3734900	0.46645
chrIII	3800700	0.864018
chrIII	3822700	0.775495
chrIII	3870200	0.847638
chrIII	3916400	0.415271
chrIII	4013100	0.797832
chrIII	4091000	0.888047
chrIII	4195500	0.818217
chrIII	4274400	0.90498
chrIII	4313000	0.374265
chrIII	4362400	0.599466
chrIII	4405000	0.565994
chrIII	4475800	0.720193
chrIII	4514900	0.7847
chrIII	4561300	0.686626
chrIII	4586600	0.511676
chrIII	4666600	0.834645
chrIII	4724300	0.551124
chrIII	4751600	0.751569
chrIII	4786500	0.665398
chrIII	4806200	0.635744
chrIII	4853000	0.748224
chrIII	4878700	0.712939
chrIII	4900800	0.703179
chrIII	4924400	0.663158
chrIII	4948400	0.486516
chrIII	4991200	0.748418
chrIII	5016300	0.746485
chrIII	5078500	0.542872
chrIII	5142600	0.700593
chrIII	5182400	0.660051
chrIII	5244900	0.609483
chrIII	5274700	0.369318
chrIII	5314100	0.491262
chrIII	5367900	0.850165
chrIII	5408500	0.832418
chrIII	5425400	0.832418
chrIII	5450600	0.653794
chrIII	5501900	0.753087
chrIII	5544200	0.679689
chrIII	5586700	0.706843
chrIII	5618800	0.596898
chrIII	5661000	0.865943
chrIII	5721600	0.747416
chrIII	5788200	0.818441
chrIII	5806800	0.818441
chrIII	5838100	0.655595
chrIII	5902400	0.655007
chrIII	5939600	0.707247
chrIII	5958900	0.695829
chrIII	5990000	0.538415
chrIII	6045200	0.540017
chrIII	6073900	0.535177
chrIII	6136100	0.625387
chrIII	6157300	0.59902
chrIII	6206100	0.519435
chrIII	6250500	0.692244
chrIII	6280600	0.846089
chrIII	6337400	0.772199
chrIII	6373100	0.633406
chrIII	6421900	0.814445
chrIII	6453200	0.680885
chrIII	6479500	0.503664
chrIII	6558900	0.681501
chrIII	6606100	0.845458
chrIII	6631300	0.43259
chrIII	6711400	0.817712
chrIII	6829000	0.903771
chrIII	6871200	0.61213
chrIII	6928800	0.714028
chrIII	6977100	0.732792
chrIII	7031600	0.526837
chrIII	7070700	0.779061
chrIII	7119100	0.785372
chrIII	7160400	0.754767
chrIII	7179900	0.694539
chrIII	7208200	0.404393
chrIII	7236600	0.321171
chrIII	7276000	0.638959
chrIII	7318800	0.642983
chrIII	7339100	0.635773
chrIII	7377100	0.469189
chrIII	7404700	0.251056
chrIII	7495400	0.877709
chrIII	7570300	0.723421
chrIII	7620900	0.780037
chrIII	7659400	0.911432
chrIII	7715400	0.866638
chrIII	7730100	0.864901
chrIII	7774200	0.493634
chrIII	7826800	0.629338
chrIII	7860500	0.624196
chrIII	7911800	0.653519
chrIII	7962400	0.580882
chrIII	8023300	0.678129
chrIII	8081700	0.715966
chrIII	8100300	0.731298
chrIII	8128000	0.781135
chrIII	8157800	0.548059
chrIII	8242300	0.730189
chrIII	8300600	0.780322
chrIII	8370200	0.964727
chrIII	8423300	0.79299
chrIII	8449600	0.420791
chrIII	8489900	0.780944
chrIII	8504900	0.780944
chrIII	8528800	0.501636
chrIII	8601600	0.795478
chrIII	8624200	0.756939
chrIII	8688600	0.68496
chrIII	8737100	0.658916
chrIII	8797800	0.799524
chrIII	8852000	0.525421
chrIII	8874100	0.707851
chrIII	8902200	0.552074
chrIII	8957800	0.733785
chrIII	8983200	0.557182
chrIII	9008700	0.477741
chrIII	9050200	0.801359
chrIII	9069000	0.801359
chrIII	9115400	0.79462
chrIII	9181300	0.777636
chrIII	9229400	0.752676
chrIII	9247300	0.752676
chrIII	9328200	0.63856
chrIII	9343900	0.63856
chrIII	9386700	0.771737
chrIII	9409100	0.773166
chrIII	9447400	0.869905
chrIII	9515700	0.532411
chrIII	9546400	0.529256
chrIII	9620900	0.746306
chrIII	9665000	0.743307
chrIII	9699600	0.813947
chrIII	9746800	0.772921
chrIII	9767900	0.72511
chrIII	9820900	0.602723
chrIII	9861200	0.433476
chrIII	9967000	0.882453
chrIII	9993300	0.583204
chrIII	10059500	0.728737
chrIII	10096400	0.656233
chrIII	10119500	0.556124
chrIII	10162200	0.575702
chrIII	10197900	0.790534
chrIII	10249900	0.798347
chrIII	10264000	0.798347
chrIII	10320000	0.834639
chrIII	10407300	0.700193
chrIII	10438800	0.740265
chrIII	10475300	0.553336
chrIII	10505600	0.427649
chrIII	10567000	0.773544
chrIII	10625200	0.735629
chrIII	10668500	0.703953
chrIII	10718700	0.768928
chrIII	10757300	0.564423
chrIII	10818600	0.790882
chrIII	10877800	0.521843
chrIII	10910600	0.547369
chrIII	10931500	0.507509
chrIII	11033600	0.681487
chrIII	11062600	0.725787
chrIII	11141700	0.605732
chrIII	11245900	0.684089
chrIII	11288200	0.642762
chrIII	11355700	0.693242
chrIII	11380800	0.559956
chrIII	11455500	0.887918
chrIII	11481500	0.769158
chrIII	11560200	0.831941
chrIII	11624400	0.44539
chrIII	11649400	0.593026
chrIII	11723200	0.644209
chrIII	11746300	0.570296
chrIII	11826200	0.795351
chrIII	11849900	0.682504
chrIII	11864300	0.508858
chrIII	11909100	0.868851
chrIII	11969700	0.616273
chrIII	12001500	0.337403
chrIII	12031200	0.563252
chrIII	12061900	0.656901
chrIII	12141900	0.79876
chrIII	12221700	0.79799
chrIII	12250900	0.540123
chrIII	12336300	0.764044
chrIII	12366400	0.804567
chrIII	12425000	0.820656
chrIII	12454400	0.71787
chrIII	12497300	0.507634
chrIII	12527800	0.685871
chrIII	12576900	0.829541
chrIII	12614500	0.755319
chrIII	12688200	0.638694
chrIII	12711500	0.537572
chrIII	12746200	0.268321
chrIII	12815700	0.702055
chrIII	12876300	0.873884
chrIII	12895200	0.84846
chrIII	12927500	0.345553
chrIII	12975900	0.758618
chrIII	13065200	0.94375
chrIII	13106000	0.471353
chrIII	13155600	0.537902
chrIII	13180800	0.558961
chrIII	13227500	0.705496
chrIII	13258100	0.873646
chrIII	13296500	0.661418
chrIII	13314300	0.661163
chrIII	13340800	0.371047
chrIII	13393300	0.59188
chrIII	13421000	0.644109
chrIII	13463500	0.771589
chrIII	13533800	0.743715
chrIII	13562900	0.539305
chrIII	13637400	0.913308
chrIII	13662400	0.703577
chrIII	13716400	0.789699
chrIII	13764300	0.649859
chrIV	10900	1
chrIV	46200	1
chrIV	127200	0.888807
chrIV	150000	0.797946
chrIV	180900	0.723598
chrIV	256000	0.609917
chrIV	313000	0.630117
chrIV	341900	0.729538
chrIV	384000	0.849209
chrIV	424100	0.416283
chrIV	447100	0.358471
chrIV	521800	0.86252
chrIV	559500	0.896639
chrIV	658600	0.782097
chrIV	677800	0.728471
chrIV	712000	0.609551
chrIV	735000	0.660611
chrIV	769700	0.651862
chrIV	829000	0.675884
chrIV	903500	1
chrIV	957000	0.787138
chrIV	990900	0.690445
chrIV	1013100	0.651165
chrIV	1054400	0.475811
chrIV	1103800	0.588391
chrIV	1175400	0.656876
chrIV	1204600	0.659986
chrIV	1277500	0.806901
chrIV	1305200	0.636898
chrIV	1346700	0.672858
chrIV	1360700	0.672858
chrIV	1390500	0.691622
chrIV	1418900	0.615827
chrIV	1446700	0.496118
chrIV	1497000	0.616235
chrIV	1601900	0.817154
chrIV	1652300	0.657694
chrIV	1707700	0.678988
chrIV	1752000	0.680814
chrIV	1806800	0.603287
chrIV	1845400	0.755175
chrIV	1898100	0.882926
chrIV	1973400	0.570446
chrIV	1999400	0.451412
chrIV	2034800	0.643719
chrIV	2061400	0.486363
chrIV	2083700	0.537478
chrIV	2135100	0.757486
chrIV	2177700	0.790114
chrIV	2219000	0.890197
chrIV	2296800	0.638776
chrIV	2322100	0.520025
chrIV	2387700	0.806826
chrIV	2419300	0.538287
chrIV	2491500	0.669144
chrIV	2611000	0.902191
chrIV	2639500	0.590971
chrIV	2675600	0.477374
chrIV	2709800	0.622903
chrIV	2778000	0.672389
chrIV	2801300	0.447881
chrIV	2899300	0.84492
chrIV	2996000	0.903858
chrIV	3054600	0.704545
chrIV	3094700	0.533598
chrIV	3161200	0.776879
chrIV	3233100	0.909399
chrIV	3275000	0.675617
chrIV	3333900	0.729889
chrIV	3374800	0.570921
chrIV	3390400	0.570921
chrIV	3516400	0.883506
chrIV	3580400	0.606365
chrIV	3601500	0.558638
chrIV	3651300	0.69294
chrIV	3726000	0.760016
chrIV	3744900	0.758154
chrIV	3766200	0.696742
chrIV	3826200	0.747676
chrIV	3987600	0.815174
chrIV	4019500	0.819624
chrIV	4050300	0.587752
chrIV	4078400	0.442065
chrIV	4160700	0.86915
chrIV	4187000	0.793428
chrIV	4243300	0.615855
chrIV	4315900	0.729421
chrIV	4357000	0.88107
chrIV	4405800	0.906408
chrIV	4446400	0.924111
chrIV	4475600	0.35926
chrIV	4511700	0.434196
chrIV	4590900	0.666732
chrIV	4653900	0.90575
chrIV	4755600	0.638234
chrIV	4780800	0.395523
chrIV	4808800	0.262157
chrIV	4886100	0.418918
chrIV	4934700	0.57441
chrIV	4961000	0.661315
chrIV	5076900	0.952579
chrIV	5169100	0.717982
chrIV	5247100	0.905983
chrIV	5354000	0.865142
chrIV	5370300	0.858116
chrIV	5393300	0.541829
chrIV	5483300	0.929521
chrIV	5505600	0.928624
chrIV	5550800	0.390142
chrIV	5599100	0.69593
chrIV	5656400	0.642815
chrIV	5753500	0.808769
chrIV	5817100	0.760075
chrIV	5854700	0.748831
chrIV	5934100	0.923529
chrIV	5969000	0.724631
chrIV	6097900	0.860112
chrIV	6208200	0.478904
chrIV	6290300	0.845178
chrIV	6326700	0.64192
chrIV	6377200	0.502281
chrIV	6409100	0.500139
chrIV	6472700	0.740921
chrIV	6523900	0.666778
chrIV	6555700	0.706036
chrIV	6576900	0.76248
chrIV	6603700	0.556726
chrIV	6647200	0.511867
chrIV	6753000	0.817115
chrIV	6790700	0.678284
chrIV	6845900	0.569662
chrIV	6912700	0.773547
chrIV	6988700	0.891656
chrIV	7019700	0.589408
chrIV	7047800	0.517726
chrIV	7064300	0.517726
chrIV	7087200	0.4482
chrIV	7147500	0.737954
chrIV	7166500	0.728309
chrIV	7235900	0.748952
chrIV	7313300	0.661674
chrIV	7335500	0.594171
chrIV	7387900	0.922786
chrIV	7486100	0.854887
chrIV	7520000	0.349943
chrIV	7556400	0.736656
chrIV	7580300	0.584274
chrIV	7632600	0.73224
chrIV	7657200	0.580627
chrIV	7722400	0.670793
chrIV	7791900	0.845217
chrIV	7842100	0.639204
chrIV	7906800	0.845312
chrIV	7924600	0.797067
chrIV	7948100	0.506466
chrIV	8008900	0.874548
chrIV	8059700	0.717979
chrIV	8092100	0.703333
chrIV	8122300	0.528974
chrIV	8142600	0.512824
chrIV	8182200	0.638739
chrIV	8228900	0.544711
chrIV	8294200	0.772093
chrIV	8333000	0.913198
chrIV	8404600	0.665215
chrIV	8429100	0.635363
chrIV	8507600	0.725144
chrIV	8538600	0.306612
chrIV	8612700	0.877778
chrIV	8629500	0.822747
chrIV	8697000	0.661968
chrIV	8726100	0.820766
chrIV	8784700	0.909118
chrIV	8820000	0.60653
chrIV	8891400	0.606878
chrIV	8919200	0.481064
chrIV	8965900	0.570416
chrIV	9012500	0.515694
chrIV	9037400	0.402055
chrIV	9064700	0.803858
chrIV	9105100	0.800045
chrIV	9123800	0.757532
chrIV	9193400	0.884128
chrIV	9218300	0.761452
chrIV	9266000	0.90758
chrIV	9324700	0.515834
chrIV	9343700	0.510484
chrIV	9374800	0.365491
chrIV	9400200	0.429111
chrIV	9444500	0.848183
chrIV	9514700	0.70315
chrIV	9533200	0.672776
chrIV	9608800	0.866077
chrIV	9641700	0.639477
chrIV	9667600	0.657098
chrIV	9773400	0.936394
chrIV	9803600	0.206581
chrIV	9855600	0.684816
chrIV	9874000	0.684816
chrIV	9899200	0.503939
chrIV	9926900	0.502798
chrIV	9947200	0.503086
chrIV	9983600	0.687805
chrIV	10003600	0.681636
chrIV	10062400	0.793806
chrIV	10087200	0.728426
chrIV	10130500	0.781674
chrIV	10188000	0.709083
chrIV	10252100	0.701038
chrIV	10284800	0.519088
chrIV	10368100	0.731203
chrIV	10421100	0.639351
chrIV	10479400	0.530418
chrIV	10500600	0.506597
chrIV	10552800	0.813909
chrIV	10574400	0.754616
chrIV	10615800	0.520868
chrIV	10663200	0.789176
chrIV	10699200	0.697729
chrIV	10715800	0.700091
chrIV	10768000	0.559149
chrIV	10820900	0.928862
chrIV	10869800	0.475752
chrIV	10935800	0.790455
chrIV	10971500	0.534666
chrIV	11028100	0.925458
chrIV	11083700	0.909507
chrIV	11115500	0.919319
chrIV	11150200	0.548813
chrIV	11166100	0.548813
chrIV	11209300	0.350471
chrIV	11320700	0.898256
chrIV	11341100	0.825894
chrIV	11405100	0.824118
chrIV	11487700	0.751975
chrIV	11524300	0.656683
chrIV	11564600	0.806032
chrIV	11593900	0.591717
chrIV	11645700	0.611654
chrIV	11691900	0.849386
chrIV	11717300	0.609449
chrIV	11743600	0.604944
chrIV	11828300	0.865674
chrIV	11865800	0.525395
chrIV	11923400	0.539791
chrIV	11966900	0.673557
chrIV	12044200	0.875485
chrIV	12079300	0.534385
chrIV	12129700	0.695764
chrIV	12157500	0.663194
chrIV	12178400	0.793472
chrIV	12208400	0.506521
chrIV	12274700	0.718093
chrIV	12331100	0.917876
chrIV	12373700	0.802965
chrIV	12398600	0.586578
chrIV	12471900	0.683224
chrIV	12545600	0.929352
chrIV	12617100	0.800522
chrIV	12651200	0.616188
chrIV	12686600	0.635851
chrIV	12813700	0.845099
chrIV	12831700	0.819851
chrIV	12852400	0.490312
chrIV	12927800	0.543065
chrIV	12999900	0.934578
chrIV	13030100	0.883562
chrIV	13093900	0.676208
chrIV	13120800	0.494762
chrIV	13154700	0.697872
chrIV	13183200	0.784835
chrIV	13240200	0.668275
chrIV	13297600	0.58176
chrIV	13349200	0.396642
chrIV	13375100	0.888242
chrIV	13392800	0.8839
chrIV	13414700	0.571893
chrIV	13454600	0.563649
chrIV	13503200	0.779121
chrIV	13536600	0.443358
chrIV	13587300	0.457938
chrIV	13656400	0.722918
chrIV	13699000	0.840509
chrIV	13717600	0.802238
chrIV	13779300	0.823831
chrIV	13888200	0.912264
chrIV	13945300	0.688507
chrIV	14033300	0.95265
chrIV	14071600	0.443819
chrIV	14107300	0.294187
chrIV	14192100	0.606382
chrIV	14220600	0.651541
chrIV	14297500	0.848423
chrIV	14325700	0.42835
chrIV	14454400	0.708096
chrIV	14497100	0.601145
chrIV	14560800	0.615927
chrIV	14594000	0.677326
chrIV	14624200	0.724538
chrIV	14661600	0.673529
chrIV	14763400	0.908082
chrIV	14792900	0.808527
chrIV	14826900	0.588305
chrIV	14871300	0.522394
chrIV	14905800	0.363907
chrIV	14956500	0.724548
chrIV	15035800	0.874524
chrIV	15109200	0.441038
chrIV	15138400	0.576068
chrIV	15197800	0.54851
chrIV	15259000	0.568634
chrIV	15309700	0.605823
chrIV	15354900	0.60657
chrIV	15389400	0.622052
chrIV	15412900	0.598304
chrIV	15448600	0.801207
chrIV	15472400	0.797867
chrIV	15531100	0.761285
chrIV	15568800	0.625694
chrIV	15646900	0.843122
chrIV	15695500	0.451701
chrIV	15746500	0.566739
chrIV	15789300	0.645753
chrIV	15853400	0.723726
chrIV	15895700	0.724852
chrIV	15947800	0.594776
chrIV	16024500	0.870582
chrIV	16129000	0.561445
chrIV	16170500	0.672661
chrIV	16257100	0.568137
chrIV	16283700	0.599054
chrIV	16399200	0.937117
chrIV	16494400	0.870235
chrIV	16770900	0.730641
chrIV	16863200	0.791874
chrIV	16953300	0.63881
chrIV	16992000	0.463876
chrIV	17011200	0.524635
chrIV	17089100	0.852969
chrIV	17120600	0.439775
chrIV	17165900	0.590244
chrIV	17214700	0.744357
chrIV	17277400	0.845799
chrIV	17333200	0.577741
chrIV	17376000	0.485647
chrIV	17464100	0.817518
chrV	9300	0.828458
chrV	102700	0.826404
chrV	127200	0.66554
chrV	154400	0.791584
chrV	240000	0.557243
chrV	299100	0.64889
chrV	356100	0.730575
chrV	459200	0.706394
chrV	532800	0.56669
chrV	563700	0.49482
chrV	624500	0.606133
chrV	646900	0.54116
chrV	699100	0.736755
chrV	724100	0.706151
chrV	767400	0.571677
chrV	784100	0.571677
chrV	855400	0.690756
chrV	912800	0.796408
chrV	975500	0.891368
chrV	1059600	0.625021
chrV	1152100	0.865771
chrV	1198000	0.768563
chrV	1242800	0.83074
chrV	1368300	0.718796
chrV	1390000	0.675174
chrV	1474700	0.905854
chrV	1573900	0.941218
chrV	1699400	0.656751
chrV	1740500	0.680802
chrV	1775500	0.609961
chrV	1828800	0.640723
chrV	1872200	0.815454
chrV	1971900	0.547941
chrV	2006000	0.658554
chrV	2069700	0.680447
chrV	2123800	0.722053
chrV	2183900	0.494555
chrV	2215900	0.554363
chrV	2251900	0.623433
chrV	2280300	0.561219
chrV	2300800	0.482934
chrV	2346700	0.554567
chrV	2614800	0.812587
chrV	2654100	0.638456
chrV	2693700	0.585216
chrV	2774600	0.573764
chrV	2812900	0.643675
chrV	2830500	0.643675
chrV	2878200	0.603059
chrV	2915700	0.489828
chrV	2933700	0.495004
chrV	2957200	0.55937
chrV	3041300	0.717535
chrV	3085100	0.524398
chrV	3200400	0.914247
chrV	3256400	0.558126
chrV	3305200	0.387242
chrV	3341500	0.560557
chrV	3448600	0.897281
chrV	3507700	0.424737
chrV	3552400	0.603156
chrV	3586300	0.699976
chrV	3646500	0.786913
chrV	3704900	0.844914
chrV	3759500	0.530766
chrV	3820700	0.489788
chrV	3862900	0.578399
chrV	3891800	0.478417
chrV	3934100	0.570265
chrV	3974500	0.717415
chrV	4026600	0.776976
chrV	4068700	0.626265
chrV	4171700	0.867084
chrV	4195400	0.491337
chrV	4308700	0.830884
chrV	4349400	0.836746
chrV	4486800	0.912659
chrV	4529300	0.53122
chrV	4555500	0.338148
chrV	4620400	0.614512
chrV	4690600	0.767584
chrV	4737500	0.657957
chrV	4820500	0.784041
chrV	4839200	0.681617
chrV	4862400	0.537714
chrV	4893500	0.638835
chrV	4963700	0.914841
chrV	5027300	0.659745
chrV	5047800	0.629291
chrV	5085900	0.524988
chrV	5131100	0.514451
chrV	5199800	0.779845
chrV	5219200	0.746402
chrV	5238600	0.652499
chrV	5273100	0.702257
chrV	5321500	0.779755
chrV	5389000	0.588424
chrV	5433000	0.679801
chrV	5475300	0.688285
chrV	5505300	0.737715
chrV	5524400	0.736111
chrV	5561000	0.84206
chrV	5582600	0.841192
chrV	5660900	0.839052
chrV	5707500	0.54114
chrV	5779100	0.777968
chrV	5827200	0.768917
chrV	5848700	0.711382
chrV	6021200	0.880969
chrV	6100800	1
chrV	6228900	0.952341
chrV	6271000	0.378114
chrV	6327600	0.390534
chrV	6373500	0.737811
chrV	6427100	0.935685
chrV	6470500	0.794787
chrV	6513200	0.473847
chrV	6537400	0.342889
chrV	6587800	0.680879
chrV	6655100	0.715164
chrV	6679500	0.667169
chrV	6712800	0.519506
chrV	6796800	0.733863
chrV	6879400	0.914673
chrV	6929800	0.256609
chrV	6955200	0.496347
chrV	6999000	0.591067
chrV	7059100	0.760478
chrV	7112100	0.602548
chrV	7195400	0.868386
chrV	7236400	0.455845
chrV	7327900	0.593364
chrV	7383400	0.547026
chrV	7437600	0.691861
chrV	7462400	0.669713
chrV	7575900	0.765179
chrV	7595800	0.679322
chrV	7686800	0.827163
chrV	7742500	0.950743
chrV	7771300	0.540225
chrV	7804300	0.545265
chrV	7853200	0.580984
chrV	7979300	0.901184
chrV	8016900	0.608676
chrV	8039500	0.541832
chrV	8129700	0.681163
chrV	8206500	0.69214
chrV	8221300	0.691811
chrV	8303000	0.617443
chrV	8354500	0.732884
chrV	8406100	0.777157
chrV	8455900	0.542108
chrV	8532900	0.896477
chrV	8604200	0.716123
chrV	8666800	0.436482
chrV	8787600	0.957554
chrV	8942600	0.438276
chrV	8966500	0.40513
chrV	9092900	0.888474
chrV	9175800	0.776369
chrV	9213700	0.823328
chrV	9243300	0.664398
chrV	9275100	0.518639
chrV	9342400	0.814264
chrV	9386100	0.733488
chrV	9422700	0.479371
chrV	9441600	0.631356
chrV	9547400	0.856168
chrV	9646200	0.70531
chrV	9697900	0.767406
chrV	9731300	0.591714
chrV	9786400	0.442097
chrV	9857400	0.751405
chrV	9923600	0.713147
chrV	9981100	0.867644
chrV	10038400	0.860267
chrV	10125200	0.612569
chrV	10177900	0.567381
chrV	10240200	0.679926
chrV	10326800	0.91692
chrV	10357700	0.715981
chrV	10463800	0.795624
chrV	10535400	0.655833
chrV	10583000	0.672335
chrV	10656700	0.867919
chrV	10717400	0.898233
chrV	10740100	0.723946
chrV	10809500	0.637164
chrV	10855100	0.662779
chrV	10899100	0.861419
chrV	10942600	0.924486
chrV	10967500	0.645255
chrV	11035200	0.690324
chrV	11077100	0.785453
chrV	11118900	0.403596
chrV	11209600	0.856803
chrV	11231500	0.739845
chrV	11282900	0.690792
chrV	11338500	0.773414
chrV	11410300	0.361233
chrV	11438700	0.583034
chrV	11490800	0.828419
chrV	11513900	0.709744
chrV	11548900	0.612475
chrV	11571000	0.550625
chrV	11614100	0.679074
chrV	11639900	0.854285
chrV	11674100	0.79056
chrV	11773600	0.628847
chrV	11845200	0.755974
chrV	11896400	0.792839
chrV	11954500	0.861254
chrV	11985100	0.455838
chrV	12000300	0.455838
chrV	12041000	0.704945
chrV	12068400	0.485614
chrV	12111900	0.560318
chrV	12192600	0.85442
chrV	12215100	0.775745
chrV	12279100	0.690782
chrV	12301400	0.640931
chrV	12405000	0.653339
chrV	12447200	0.838073
chrV	12469500	0.836169
chrV	12497600	0.566861
chrV	12527200	0.461297
chrV	12550300	0.504453
chrV	12640100	0.772471
chrV	12695800	0.505639
chrV	12743900	0.60281
chrV	12765400	0.546477
chrV	12816600	0.602014
chrV	12861300	0.727401
chrV	12901200	0.681156
chrV	12951100	0.854778
chrV	12968800	0.824178
chrV	13022300	0.664828
chrV	13048600	0.337451
chrV	13158200	0.78552
chrV	13288900	0.735601
chrV	13333500	0.66604
chrV	13396400	0.809009
chrV	13463200	0.494122
chrV	13500100	0.443311
chrV	13564000	0.706687
chrV	13657500	0.868911
chrV	13683600	0.508658
chrV	13710100	0.434094
chrV	13787700	0.897566
chrV	13813800	0.722492
chrV	13890400	0.44487
chrV	13961300	0.731984
chrV	14011300	0.868685
chrV	14049500	0.518255
chrV	14092900	0.733477
chrV	14136200	0.814763
chrV	14183000	0.660594
chrV	14202800	0.634262
chrV	14276400	0.654791
chrV	14298500	0.587532
chrV	14358500	0.863412
chrV	14426000	0.910182
chrV	14503000	0.914627
chrV	14600600	0.65703
chrV	14645000	0.764679
chrV	14696500	0.860095
chrV	14732400	0.3814
chrV	14791700	0.940389
chrV	14828800	0.690679
chrV	14850000	0.690679
chrV	14897400	0.525028
chrV	15002300	0.863813
chrV	15064700	0.906568
chrV	15143400	0.684405
chrV	15188800	0.701727
chrV	15212300	0.643776
chrV	15236500	0.401338
chrV	15260200	0.510552
chrV	15305700	0.601423
chrV	15393700	0.807522
chrV	15497700	0.865617
chrV	15516500	0.827307
chrV	15578800	0.696538
chrV	15604700	0.538616
chrV	15659300	0.538241
chrV	15700400	0.436913
chrV	15768500	0.754443
chrV	15799400	0.458361
chrV	15821400	0.498571
chrV	15878800	0.675034
chrV	15912800	0.560992
chrV	15957000	0.706935
chrV	16039800	0.932012
chrV	16095400	0.314705
chrV	16161600	0.554
chrV	16194200	0.533322
chrV	16222000	0.57853
chrV	16262300	0.666698
chrV	16358100	0.837879
chrV	16401100	0.643414
chrV	16420500	0.631
chrV	16498000	0.697512
chrV	16554100	0.635145
chrV	16597800	0.545455
chrV	16620500	0.45616
chrV	16665800	0.705542
chrV	16693900	0.580082
chrV	16742400	0.870412
chrV	16793400	0.630822
chrV	16820300	0.307941
chrV	16874600	0.581163
chrV	16912500	0.660745
chrV	16966200	0.678234
chrV	17038500	0.580597
chrV	17125100	0.976682
chrV	17221000	0.550001
chrV	17263800	0.600211
chrV	17298400	0.618768
chrV	17317200	0.608188
chrV	17382000	0.645689
chrV	17457500	0.613777
chrV	17512200	0.618472
chrV	17539100	0.609035
chrV	17580600	0.651002
chrV	17657300	0.648752
chrV	17684800	0.514406
chrV	17723000	0.662098
chrV	17748000	0.586677
chrV	17778700	0.596189
chrV	17857600	0.814254
chrV	17928400	0.83597
chrV	17951900	0.833117
chrV	17990000	0.45529
chrV	18020400	0.639979
chrV	18051400	0.514151
chrV	18080000	0.942849
chrV	18109500	0.27073
chrV	18180600	0.560673
chrV	18220200	0.557322
chrV	18255300	0.530568
chrV	18290300	0.653557
chrV	18315700	0.568872
chrV	18366600	0.615712
chrV	18394400	0.535956
chrV	18416200	0.615005
chrV	18461400	0.74358
chrV	18489400	0.758311
chrV	18591200	0.911309
chrV	18682400	0.816579
chrV	18703800	0.707683
chrV	18725400	0.487172
chrV	18808100	0.687819
chrV	18839200	0.61309
chrV	18867400	0.599968
chrV	18903000	0.72403
chrV	18973100	0.78091
chrV	19006600	0.41965
chrV	19082500	0.798973
chrV	19126500	0.820135
chrV	19190300	0.757977
chrV	19243200	0.843458
chrV	19303600	0.801176
chrV	19328700	0.517561
chrV	19352100	0.361959
chrV	19376900	0.403828
chrV	19527900	0.884706
chrV	19623400	0.709153
chrV	19648100	0.576916
chrV	19673700	0.455645
chrV	19729000	0.562784
chrV	19779700	0.563629
chrV	19801800	0.552685
chrV	19819400	0.558379
chrV	19875400	0.752932
chrV	19898500	0.696595
chrV	19955200	0.746938
chrV	20007000	0.755268
chrV	20072400	0.821778
chrV	20181700	0.780292
chrV	20198100	0.780292
chrV	20250200	0.720185
chrV	20271600	0.711992
chrV	20341300	0.86446
chrV	20381000	0.776697
chrV	20412800	0.824288
chrV	20475400	0.701587
chrV	20532100	0.515936
chrV	20573200	0.636171
chrV	20651800	0.87627
chrV	20712000	0.789847
chrV	20746000	0.490097
chrV	20775900	0.502416
chrV	20830400	0.826531
chrV	20922000	0.401211
chrX	42600	0.592896
chrX	71700	0.607229
chrX	103800	0.44484
chrX	139700	0.74283
chrX	171400	0.777527
chrX	206900	0.587823
chrX	253800	1
chrX	297500	0.837631
chrX	319100	0.864479
chrX	353000	0.826305
chrX	390400	0.765018
chrX	432700	0.345462
chrX	473600	0.54621
chrX	501100	0.555755
chrX	536000	0.700495
chrX	594400	0.905826
chrX	693400	0.843423
chrX	728000	0.484892
chrX	764200	0.652414
chrX	828200	0.840969
chrX	853400	0.651388
chrX	871500	0.623087
chrX	915800	0.534396
chrX	954500	0.645703
chrX	988000	0.660848
chrX	1009900	0.536394
chrX	1093700	0.786905
chrX	1122500	0.691854
chrX	1191100	0.814967
chrX	1223100	0.827158
chrX	1252700	0.307215
chrX	1302200	0.604016
chrX	1342500	0.397464
chrX	1398500	0.646501
chrX	1450600	0.861397
chrX	1494100	0.514303
chrX	1531600	0.486382
chrX	1557900	0.70254
chrX	1581100	0.755892
chrX	1601300	0.737618
chrX	1623500	0.647469
chrX	1657500	0.429098
chrX	1688400	0.621221
chrX	1714700	0.622043
chrX	1746000	0.535827
chrX	1800600	0.829529
chrX	1856400	0.798106
chrX	1911100	0.60505
chrX	1957000	0.939234
chrX	1997100	0.628726
chrX	2045500	0.954545
chrX	2089100	0.508023
chrX	2108600	0.433852
chrX	2135000	0.384089
chrX	2238200	0.876933
chrX	2287600	0.621647
chrX	2329100	0.632467
chrX	2370900	0.893733
chrX	2432100	0.899402
chrX	2454300	0.824333
chrX	2496500	0.623904
chrX	2552300	0.649013
chrX	2583600	0.428305
chrX	2703700	0.916633
chrX	2732900	0.270748
chrX	2793700	0.805312
chrX	2854300	0.856218
chrX	2880600	0.803314
chrX	2902000	0.746547
chrX	2929700	0.446582
chrX	2993900	0.500533
chrX	3065100	0.923167
chrX	3102200	0.823516
chrX	3130400	0.642877
chrX	3224800	0.661152
chrX	3259600	0.686858
chrX	3315500	0.788262
chrX	3347900	0.351556
chrX	3408500	0.671094
chrX	3470000	0.843938
chrX	3541000	0.83246
chrX	3606200	0.597565
chrX	3653200	0.853445
chrX	3678600	0.768393
chrX	3737000	0.619144
chrX	3789000	0.599246
chrX	3815400	0.481942
chrX	3830700	0.481942
chrX	3872500	0.644165
chrX	3898100	0.589362
chrX	3973700	0.864424
chrX	4010200	0.339951
chrX	4063600	0.709433
chrX	4127600	0.924118
chrX	4153000	0.868785
chrX	4221000	0.825611
chrX	4258100	0.432478
chrX	4295100	0.659311
chrX	4383800	0.382948
chrX	4469600	0.80087
chrX	4523100	0.875531
chrX	4555900	0.456663
chrX	4613900	0.793808
chrX	4653000	0.32232
chrX	4702200	0.811885
chrX	4751500	0.768142
chrX	4802800	0.853795
chrX	4881100	0.639054
chrX	4898800	0.572183
chrX	4966100	0.934506
chrX	4999800	0.286437
chrX	5022900	0.288638
chrX	5086100	0.870697
chrX	5122600	0.670122
chrX	5210200	0.804687
chrX	5281400	0.530562
chrX	5301100	0.486665
chrX	5337500	0.71812
chrX	5360000	0.676775
chrX	5475700	0.904459
chrX	5516600	0.443513
chrX	5591600	0.823211
chrX	5641600	0.750351
chrX	5695600	0.792113
chrX	5774900	0.750131
chrX	5811500	0.73061
chrX	5841400	0.577627
chrX	5995300	0.896482
chrX	6048300	0.547033
chrX	6092100	0.76424
chrX	6151300	0.600024
chrX	6208100	0.777085
chrX	6223000	0.777085
chrX	6256400	0.898241
chrX	6293000	0.210967
chrX	6341500	0.613129
chrX	6374700	0.755366
chrX	6448500	0.645655
chrX	6505700	0.625186
chrX	6551800	0.683234
chrX	6625100	0.869152
chrX	6690500	0.560023
chrX	6743800	0.854905
chrX	6804700	0.850361
chrX	6848500	0.445707
chrX	6894700	0.661298
chrX	6928600	0.544451
chrX	6996400	0.5238
chrX	7068400	0.711457
chrX	7100000	0.871839
chrX	7151900	0.880481
chrX	7230800	0.759198
chrX	7263600	0.692017
chrX	7312700	0.716533
chrX	7334600	0.591994
chrX	7364400	0.655438
chrX	7458200	0.784363
chrX	7478300	0.735271
chrX	7504300	0.655207
chrX	7523000	0.655207
chrX	7565000	0.803447
chrX	7664300	0.673824
chrX	7719400	0.719922
chrX	7746700	0.61806
chrX	7786100	0.784514
chrX	7825300	0.689859
chrX	7916500	0.829025
chrX	7963800	0.863159
chrX	7997100	0.396907
chrX	8036700	0.560982
chrX	8106400	0.675926
chrX	8159000	0.802247
chrX	8201500	0.581861
chrX	8271200	0.754635
chrX	8299200	0.460513
chrX	8371300	0.818508
chrX	8392500	0.804659
chrX	8419300	0.637201
chrX	8450100	0.249563
chrX	8552300	0.93117
chrX	8600800	0.400795
chrX	8660000	0.865518
chrX	8737600	0.759334
chrX	8789300	0.744269
chrX	8811900	0.714757
chrX	8859700	0.706537
chrX	8911700	0.499417
chrX	8997200	0.588999
chrX	9067900	0.892495
chrX	9089000	0.849345
chrX	9119300	0.347653
chrX	9146100	0.41677
chrX	9227200	0.961296
chrX	9271900	0.415095
chrX	9342500	0.662803
chrX	9402800	0.763196
chrX	9427900	0.657333
chrX	9449700	0.657333
chrX	9504900	0.789598
chrX	9544100	0.335769
chrX	9603500	0.706502
chrX	9637200	0.804568
chrX	9702700	0.59694
chrX	9757400	0.746941
chrX	9775600	0.746941
chrX	9826200	0.780832
chrX	9847900	0.716785
chrX	9932900	0.875559
chrX	9956200	0.670389
chrX	9998800	0.644743
chrX	10052800	0.568408
chrX	10076300	0.670432
chrX	10148900	0.898274
chrX	10208100	0.857601
chrX	10250400	0.288475
chrX	10332200	0.767955
chrX	10395500	0.861389
chrX	10435600	0.49207
chrX	10518100	0.857627
chrX	10566700	0.914474
chrX	10598200	0.707062
chrX	10627500	0.429299
chrX	10678000	0.706078
chrX	10766700	0.900891
chrX	10845900	0.828855
chrX	10901500	0.867062
chrX	10926500	0.777055
chrX	10992000	0.799517
chrX	11033200	0.799517
chrX	11129000	0.625968
chrX	11191900	0.817767
chrX	11209800	0.817767
chrX	11298900	0.866079
chrX	11346800	0.573622
chrX	11368800	0.512826
chrX	11417700	0.505504
chrX	11442500	0.405211
chrX	11521400	0.843041
chrX	11556100	0.553412
chrX	11603600	0.814444
chrX	11667000	0.735069
chrX	11759800	0.420894
chrX	11798300	0.772887
chrX	11842700	0.496098
chrX	11899100	0.784437
chrX	11938700	0.840124
chrX	11981000	0.563328
chrX	12057400	0.776159
chrX	12088400	0.692389
chrX	12174700	0.943067
chrX	12199400	0.650014
chrX	12232300	0.373095
chrX	12294800	0.649149
chrX	12320300	0.716124
chrX	12393700	0.617132
chrX	12410100	0.617132
chrX	12452500	0.835045
chrX	12506800	0.764833
chrX	12602200	0.644763
chrX	12638000	0.784156
chrX	12682400	0.825324
chrX	12728700	0.227624
chrX	12763500	0.527488
chrX	12856500	0.860531
chrX	12931600	0.688023
chrX	12989400	0.855681
chrX	13014000	0.672756
chrX	13052100	0.456735
chrX	13120800	0.908383
chrX	13146000	0.848183
chrX	13170000	0.67994
chrX	13226200	0.895411
chrX	13252200	0.472954
chrX	13328900	0.581513
chrX	13360300	0.586196
chrX	13419400	0.638648
chrX	13440200	0.57952
chrX	13525000	0.867937
chrX	13582900	0.876616
chrX	13744800	0.589099
chrX	13812900	0.720477
chrX	13857900	0.845902
chrX	13888100	0.780828
chrX	13945900	0.82196
chrX	13971800	0.635297
chrX	14002400	0.57127
chrX	14027300	0.615866
chrX	14101500	0.735559
chrX	14177200	0.647431
chrX	14191900	0.647431
chrX	14242800	0.596391
chrX	14297800	0.800676
chrX	14337900	0.58789
chrX	14446000	0.86709
chrX	14485800	0.944885
chrX	14506500	0.91485
chrX	14603000	0.708008
chrX	14636100	0.557265
chrX	14654800	0.557265
chrX	14703400	0.649765
chrX	14757700	0.718378
chrX	14816700	0.753615
chrX	14842200	0.57761
chrX	14877700	0.244544
chrX	14949500	0.927015
chrX	14979700	0.509322
chrX	15042100	0.687835
chrX	15182200	0.68525
chrX	15248500	0.888898
chrX	15280800	0.699954
chrX	15346000	0.906161
chrX	15436600	0.56169
chrX	15508700	0.831313
chrX	15548800	0.64478
chrX	15603800	0.837811
chrX	15683000	0.729362
chrX	15705600	0.689448
chrX	15725700	0.672443
chrX	15799200	0.541745
chrX	15841800	0.763979
chrX	15867500	0.509479
chrX	15919600	0.578838
chrX	15945500	0.577678
chrX	15986200	0.704131
chrX	16041800	0.74042
chrX	16150500	0.921893
chrX	16187400	0.361872
chrX	16244400	0.614762
[truncated: 31 more rows]
